# Supplementary material for: Occasional and persistent frequent attenders and sickness absences in occupational health primary care: a longitudinal study in Finland
Source: PubMed Central journal article supplement — BMJ Open. 2019 Feb 8;9(2):e024980. doi: 10.1136/bmjopen-2018-024980 (PMC6411255; doi:10.1136/bmjopen-2018-024980), 2019-02-08
Supplement: bmjopen-2018-024980.draft_revisions.pdf [file bmjopen-2018-024980.draft_revisions.pdf]

# BMJ Open

BMJ Open is committed to open peer review. As part of this commitment we make the peer review history of every article we publish publicly available.

When an article is published we post the peer reviewers' comments and the authors' responses online. We also post the versions of the paper that were used during peer review. These are the versions that the peer review comments apply to.

The versions of the paper that follow are the versions that were submitted during the peer review process. They are not the versions of record or the final published versions. They should not be cited or distributed as the published version of this manuscript.

BMJ Open is an open access journal and the full, final, typeset and author-corrected version of record of the manuscript is available on our site with no access controls, subscription charges or pay-per-view fees (<http://bmjopen.bmj.com>).

If you have any questions on BMJ Open's open peer review process please email [editorial.bmjopen@bmj.com](mailto:editorial.bmjopen@bmj.com)

# BMJ Open

## Occasional and persistent frequent attenders and sickness absences – a longitudinal study

|                               |                                                                                                                                                                                                                                                                                                                                                                                                                                                                                                                                                                                                                                                                                                 |
|-------------------------------|-------------------------------------------------------------------------------------------------------------------------------------------------------------------------------------------------------------------------------------------------------------------------------------------------------------------------------------------------------------------------------------------------------------------------------------------------------------------------------------------------------------------------------------------------------------------------------------------------------------------------------------------------------------------------------------------------|
| Journal:                      | <i>BMJ Open</i>                                                                                                                                                                                                                                                                                                                                                                                                                                                                                                                                                                                                                                                                                 |
| Manuscript ID                 | bmjopen-2018-024980                                                                                                                                                                                                                                                                                                                                                                                                                                                                                                                                                                                                                                                                             |
| Article Type:                 | Research                                                                                                                                                                                                                                                                                                                                                                                                                                                                                                                                                                                                                                                                                        |
| Date Submitted by the Author: | 25-Jun-2018                                                                                                                                                                                                                                                                                                                                                                                                                                                                                                                                                                                                                                                                                     |
| Complete List of Authors:     | Reho, Tiia; Tampereen yliopisto Laaketieteen yksikko, Faculty of Medicine and Life Sciences; Pihlajalinna, Työterveys<br>Atkins, Salla; Tampereen yliopisto Laaketieteen yksikko, New Social Research and Faculty of Social Sciences; Karolinska Institutet, Department of Public Health Sciences<br>Talola, Nina; Tampereen yliopisto Laaketieteen yksikko, Faculty of Medicine and Life Sciences<br>Sumanen, Markku; Tampereen yliopisto Laaketieteen yksikko, Faculty of Medicine and Life Sciences<br>Viljamaa, Mervi; Pihlajalinna, Työterveys<br>Uitti, Jukka; Tampereen yliopisto Laaketieteen yksikko, Faculty of Medicine and Life Sciences; Työterveyslaitos Tampereen aluetoimipiste |
| Keywords:                     | sickness absence, occupational health, PRIMARY CARE, longitudinal studies, PUBLIC HEALTH, health care utilisation                                                                                                                                                                                                                                                                                                                                                                                                                                                                                                                                                                               |
|                               |                                                                                                                                                                                                                                                                                                                                                                                                                                                                                                                                                                                                                                                                                                 |

SCHOLARONE™  
Manuscripts

1  
2  
3 Research article

4 Corresponding author

5 Tiia TM Reho

6 University of Tampere

7 Faculty of Medicine and Life Sciences

8 PB 100

9 FI-33014 UNIVERSITY OF TAMPERE

10 FINLAND

11 Email: [tiia.reho@gmail.com](mailto:tiia.reho@gmail.com)

12 +358504512123

13  
14  
15 Occasional and persistent frequent attenders and sickness absences – a longitudinal study

16  
17  
18 Tiia TM Reho <sup>1,2</sup> MD

19 Salla A Atkins <sup>3,4</sup> PhD

20  
21 Nina Talola <sup>1</sup> Msc

22 Markku PT Sumanen<sup>1</sup> MD, PhD

23  
24 Mervi Viljamaa <sup>2</sup> MD, PhD

25  
26 Jukka Uitti <sup>1,5,6</sup> MD, PhD

27  
28  
29 1 University of Tampere, Faculty of Medicine and Life Sciences, Tampere, Finland

30 2 Pihlajalinna Työterveys, Tampere, Finland

31 3 University of Tampere, New Social Research and Faculty of Social Sciences, Tampere, Finland

32 4 Karolinska Institutet, Department of Public Health Sciences, Stockholm, Sweden

33 5 Finnish Institute of Occupational Health, Tampere, Finland

34 6 Clinic of Occupational Medicine, Tampere University Hospital, Tampere, Finland

35  
36  
37  
38  
39  
40 Word count: 2975

41  
42  
43 *Key words:* sickness absence; occupational health; primary health care; longitudinal studies; public health; access to  
44  
45 health care

## ABSTRACT

*Objectives* Frequent attenders create a substantial portion of primary care workload but little is known about frequent attenders' sickness absences. The aim of the study is to investigate how occasional and persistent frequent attendance is associated with sickness absences among the working population.

*Setting and participants* This is a longitudinal study using medical record data (2014–2016) from an occupational health care provider in Finland. In total, 59 676 patients were included and categorized into occasional and persistent frequent attenders (FA) or non-frequent attenders (non-FA). Sick-leave episodes and their lengths were collected along with associated diagnostic codes. Logistic regression was used to analyze associations between FA status and sick-leaves of different lengths (1-3, 4-14 and 15 or more days).

*Results* Both occasional and persistent FA had more and longer duration of sick-leave than non-FA through the study years. Persistent frequent attenders had consistently high absence rates. Occasional FA had elevated absence rates even two years after their frequent attendance period. Persistent FAs (OR=11 in 2016) and occasional-FAs (OR=2.95 in 2016) were associated with long (15 or more days) sickness absence when compared with non-FA. Both groups of FA's had an increased risk of long term sick-leave indicating a risk of disability pension.

*Conclusion* Both occasional and persistent frequent attenders should be identified in primary care units caring for working age patients. As frequent attendance is associated with long sickness absences and possibly disability pensions, rehabilitation should be directed at this group to prevent work disability.

## STRENGTHS AND LIMITATIONS OF THIS STUDY

- This is the first study to examine sickness absence differences between occasional and persistent frequent attenders
- The study relies on large nationwide data including employees from rural and urban areas and public and private employers
- The longitudinal study design allows for examining sickness absences also after consultation rates reduce
- The study lacks information on occupational status, education and use of other service providers as these are not available from occupational health medical records

## INTRODUCTION

Frequent attendance is a costly and burdensome phenomenon for healthcare providers, society and patients.

Patients, often referred to as frequent attenders (FA), visit healthcare units repeatedly and constitute a substantial portion of both physician's time and healthcare costs.[1,2] On the other hand, FAs appear to be a vulnerable group of patients that suffer from multimorbidity, medically unexplained symptoms and low quality of life.[3–5] For most patients frequent attendance is transient while a group of persistent FAs continue recurrent visits for extended periods of time.[2,6] Research indicates that persistent FAs often suffer from some combination of somatic, psychological and social problems and are prone to anxiety and worry more than transient FAs are.[3,6,7]

Frequent attenders in general practice (GP) are often unemployed or (disability)pensioners but to date there is little known about the relationship between frequent attendance and sickness absences among the working population. [8–11] The available research indicates that chronic disease and negative life events are predictive of long term sickness absence among one year FAs.[12] A Swedish study in GP setting showed that 19% of FA's versus 6% of non-FA's received a long term sickness absence or disability pension over 5 years' follow-up.[12] Also being on sick-leave or on disability pension increased the mean number of visits in GP setting and was associated with being a frequent attender.[10,13,14] However, there are no data available on how occasional and persistent FAs differ in terms of sick-leave and if frequent attendance is predictive of future sickness absences. Little is also known about the diagnostic groups associated with FAs' sickness absences and whether these patterns are similar for occasional and persistent frequent attenders.

In Finland the proportion of time spent on disability pension is increasingly due to mental disorders, in particular depression.[15] In turn, musculoskeletal and mental disorders are the most common causes for long term sickness absences.[16,17] Both diagnostic groups are also associated with frequent attendance in the Nordic countries in a GP setting and in occupational health (OH) primary care. [18–20] Research shows that chronic illnesses that diminish work ability and symptoms related to work are associated with visiting OH primary care.[21] In the same setting, in almost half of the visits caused by mental reasons and in one third of visits due to musculoskeletal reasons, a sickness absence certificate was given.[22] These associations suggest that FAs could be a potential risk group for sickness absences and work disability. To grasp the full picture of frequent attendance and the impact on society and individuals we need to know if and how sickness absenteeism is associated with high use of services.

1  
2  
3 Understanding the association of frequent attendance with sickness absenteeism is vital to enable healthcare  
4 providers to use frequent attendance as an early marker for necessary rehabilitation. It has been shown that short  
5 term sick-leaves are associated with long sickness absences and long sick-leaves in turn predict disability.[23–25] If  
6 frequent attendance is predictive of future absences this could be used to trigger early supportive measures possibly  
7 even before the next occurrence of sickness absence. We need to define whether both occasional and persistent FAs  
8 are at equal risk of sickness absences to define appropriate groups for OH interventions where the aim is to prevent  
9 sickness absences and disability. Workplace interventions and OH intervention programs on individuals at risk of  
10 sickness absences indicate both cost effectiveness and reduction in sickness absence days.[26–28] However, current  
11 interventions are often designed around sickness absences and do not take into account patterns of frequent use.  
12 Interventions should be aimed at the group of FAs who are also at risk of long term sickness absences to ensure both  
13 resource management and disability prevention.

14  
15  
16 We aim to determine how sickness absences of different lengths are associated with occasional and persistent  
17 frequent attendance.  
18  
19  
20  
21  
22  
23  
24  
25  
26  
27  
28  
29  
30  
31  
32  
33  
34  
35  
36  
37  
38  
39  
40  
41  
42  
43  
44  
45  
46  
47  
48  
49  
50  
51  
52  
53  
54  
55  
56  
57  
58  
59  
60

## MATERIAL AND METHODS

### Study setting and design

Finnish primary health care is organized into three service sectors that function side by side. Municipal, private and occupational health all provide primary care services. Occupational health services (OHS) are divided into obligatory preventive services and voluntary primary care services which is, however, well in use covering up to 90% of employees [29]. Most professionals in OHS are specialized in occupational health. Physiotherapists and psychologists can be consulted after a referral from a nurse or a physician.

This study is conducted using data from Pihlajalinna Työterveys – a large nationwide private OHS provider. The clientele of Pihlajalinna includes employees from both municipal and private employers, with representation from different company sizes and industries. The study is a longitudinal register study using electronic medical record data of Pihlajalinna covering years 2014–2016.

### Data collection

Data used for the study included all visits to healthcare professionals and diagnostic codes (International Classification of Diseases, 10<sup>th</sup> edition, ICD-10) registered for the visit through the study years 2014–2016. The data also included employee sex and age and employers' industry and size. Pihlajalinna collected the data and the data was sent in pseudonymized format to the University of Tampere for analysis. There were no missing data.

The data initially comprised 78 507 patients. No sampling was done during collection of data. The study population was limited to employees who had visited the OH unit during the study years and were aged 18–68 years. Only face-to-face contacts were included and occupational safety check-ups were excluded. After these exclusions the study population comprised 59 676 patients. Diagnostic codes, using ICD-10, are mandatory for visits to a physician. We used the first (i.e. the main) ICD-10 diagnosis registered for each visit in this study.

### Statistical analysis

We defined FA as the top decile of attenders.[2,14] We used visits to physicians, nurses, physiotherapists and psychologists to define frequent attenders and with our definition FA visited OH units 8 or more times yearly.[20] Previously, we made a secondary analysis of frequent attenders using only visits to the physician, which did not alter the results.[20] Patients being in the top decile in 2014 but not in any other study year were categorized as 1-year-FA (1yFA) representing occasional FA. Patients who were in the top decile during all three study years (2014–2016) were

1  
2  
3 categorized as persistent-FA (pFA). Patients who were not in the top decile in any of the study years (non-frequent  
4  
5 attenders, non-FA) were used as a reference group. Patients who were FA in 2015 or 2016 but not during all three  
6  
7 study years were excluded as they were neither occasional nor persistent frequent attenders, and they could not be  
8  
9 considered non-FA.

10  
11 We divided the study population by sex and into four age categories (18–34, 35–44, 45–54, 55–68) for  
12  
13 characterization. Employer industries were categorized according to Statistics Finland /Statistical Classification of  
14  
15 economic activities in the European Community (TOL2008/Nace Rev.2). We analyzed sickness absences with different  
16  
17 categorizations. First we divided sickness absence episodes into groups according to the length: no absence, short  
18  
19 (1–3 d), intermediate (4–14 d) and long (15 d or more) absence.[30] In addition, we looked at the total number of  
20  
21 sickness absence days per year with two different categorizations (0, 1–15 or more than 15 days per year and short  
22  
23 (1–3 d) intermediate (4–14 d) and long (15 d or more)). [31] When examining sickness absences yearly we included  
24  
25 self-certified and nurse-certified sick-leaves. In the analysis of diagnostic codes associated with sickness absenteeism,  
26  
27 only physician certified sick-leaves were used.

28  
29 Chi square and Kruskal-Wallis –tests were used to test for significant differences between groups. Multinomial logistic  
30  
31 regression was used to analyze associations of the dependent variable FA-status (1yFA, pFA and non-FA) with the  
32  
33 independent variable (occurrence of a sick-leave episode and number of sickness absence days yearly). The results  
34  
35 were adjusted for sex, age, industry, number of ICD-10 diagnoses and existence of cancer diagnosis (C00-C97). Odds  
36  
37 ratios (OR) with 95% confidence intervals (CI) were determined. Statistical analyses were conducted in University of  
38  
39 Tampere using IBM SPSS Statistics version 23. In all analyses P values less than 0.05 were considered statistically  
40  
41 significant.

#### 42 43 **Ethical considerations**

44  
45 The National Institute of Health and Welfare (THL/556/5.05.OO/2016) and the ethics committee of Pirkanmaa  
46  
47 Hospital District (ETL R16041) approved the study. According to Finnish legislation individual consent was not needed  
48  
49 due to the size of the study population.  
50



## RESULTS

Our study population constituted 59 676 individuals during the study years (2014–2016). The population included 592 pFA and 2468 1yFA in 2014. The latter group diminished due to loss for follow-up as time went on so that in 2015 there were 1986 individuals and in 2016 1391 individuals in 1yFA group. Figure 1 shows the flow of the study population. Table 1 below shows descriptive statistics of 1yFA, pFA and non-FA during the study years. There were more women than men in both 1yFA and pFA throughout the study years. Over 90% of the pFA group received a sick-leave certificate from a physician every year and 90% of the 1yFA group received one in the first year. Thereafter of the 1yFA group, 70% or more received a sick-leave certificate from a physician during the study. In 2016 almost 70% of pFA and 30% of 1yFA had a sick-leave longer than 15 days while only 9% of non-FA had such a long absence.

*[Insert Figure 1. Flow of the study population]*

Table 1. Characteristics of by status (1yFA, pFA and non-FA) yearly (2014–2016), n = 59 676

|                                         | 2014, n = 24772  |      |                |      |                     |      | 2015, n = 27116  |      |                |      |                     |      | 2016, n = 41241  |      |                |      |                     |      |
|-----------------------------------------|------------------|------|----------------|------|---------------------|------|------------------|------|----------------|------|---------------------|------|------------------|------|----------------|------|---------------------|------|
|                                         | 1yFA<br>n = 2468 |      | pFA<br>n = 592 |      | non-FA<br>n = 21712 |      | 1yFA<br>n = 1986 |      | pFA<br>n = 592 |      | non-FA<br>n = 24538 |      | 1yFA<br>n = 1391 |      | pFA<br>n = 592 |      | non-FA<br>n = 39258 |      |
|                                         | n                | (%)  | n              | (%)  | n                   | (%)  | n                | (%)  | n              | (%)  | n                   | (%)  | n                | (%)  | n              | (%)  | n                   | (%)  |
| <b>Sex</b>                              |                  |      |                |      |                     |      |                  |      |                |      |                     |      |                  |      |                |      |                     |      |
| Male                                    | 1 134            | (46) | 262            | (44) | 12 783              | (59) | 924              | (46) | 262            | (44) | 14 628              | (60) | 679              | (49) | 262            | (44) | 22 277              | (57) |
| Female                                  | 1 334            | (54) | 330            | (56) | 8 929               | (41) | 1 062            | (54) | 330            | (56) | 9 910               | (40) | 712              | (51) | 330            | (56) | 16 981              | (43) |
| <b>Age</b>                              |                  |      |                |      |                     |      |                  |      |                |      |                     |      |                  |      |                |      |                     |      |
| 18–34                                   | 704              | (29) | 130            | (22) | 6 751               | (31) | 501              | (25) | 121            | (20) | 7 434               | (30) | 264              | (19) | 108            | (18) | 12 106              | (31) |
| 35–44                                   | 552              | (22) | 145            | (25) | 5 135               | (24) | 465              | (24) | 137            | (23) | 5 841               | (24) | 319              | (23) | 132            | (22) | 9 467               | (24) |
| 45–54                                   | 638              | (26) | 186            | (31) | 5 673               | (26) | 521              | (26) | 190            | (32) | 6 532               | (27) | 413              | (30) | 188            | (32) | 10 139              | (26) |
| 55–68                                   | 574              | (23) | 131            | (22) | 4 153               | (19) | 499              | (25) | 144            | (25) | 4 731               | (19) | 395              | (28) | 164            | (28) | 7 546               | (19) |
| <b>Absences</b>                         |                  |      |                |      |                     |      |                  |      |                |      |                     |      |                  |      |                |      |                     |      |
| Sickness absence certified by physician | 2 219            | (90) | 551            | (93) | 10 309              | (47) | 1 511            | (76) | 556            | (94) | 11 642              | (47) | 978              | (70) | 547            | (92) | 18 350              | (47) |
| 0 days /year                            | 207              | (8)  | 33             | (6)  | 9 554               | (44) | 377              | (19) | 26             | (4)  | 10 374              | (42) | 315              | (23) | 34             | (6)  | 16 873              | (43) |
| 1–15 days /year                         | 768              | (31) | 147            | (25) | 10 026              | (46) | 873              | (44) | 127            | (22) | 11 722              | (48) | 653              | (47) | 150            | (25) | 18 906              | (48) |
| >15 days /year                          | 1493             | (61) | 412            | (69) | 2 132               | (10) | 739              | (37) | 439            | (74) | 2 442               | (10) | 423              | (30) | 408            | (69) | 3 479               | (9)  |

Statistically significant results with Chi square -tests,  $p < 0.001$

FA status was defined as the top decile of attenders (frequent attender 10%, FA10)

1yFA = Patients that were in the top decile of attenders in 2014

pFA = Patients that were in the top decile in all three study years (2014, 2015 and 2016)

non-FA = Patients that were never in the top decile were considered as a reference group, non-frequent attenders

1  
2  
3 As a whole the pFA group had a median of 16 absence episodes during the three study years, the 1yFA group had 7  
4 episodes and the non-FA group had a median of 2 episodes, all certified by a physician (table 2). The pFA group had a  
5 constant median 5 to 6 sickness absence episodes yearly whereas the 1yFA group had a median of 4 sickness absence  
6 episodes in 2014, after which the frequency of episodes diminished. However, the frequency of sickness episodes  
7 remained higher among the 1yFA group than in the non-FA group two years after the 1yFA group's frequent  
8 attendance ended.  
9  
10  
11  
12  
13  
14

15 The lengths of sickness absence episodes are shown in table 2. The average length of a sickness absence episode is  
16 consistently high for the pFA group. It is equally high for 1yFA in the first study year, their year of frequent attendance,  
17 but the mean and median length of sickness absence reduces slowly, while remaining higher through the study years  
18 compared with the non-FA group. The median lengths of single absence episodes are equal between the groups. The  
19 median length of single sickness absence episode due to mental and behavioural disorders (F00–F99) was 9, 7 and 7  
20 days for 1yFA, pFA and non-FA respectively. The median lengths for musculoskeletal disorders (M00–M99) among  
21 1yFA, pFA and non-FA were 7, 5 and 5 days respectively (data not shown).  
22  
23  
24  
25  
26  
27  
28  
29  
30  
31  
32  
33  
34  
35  
36  
37  
38  
39  
40  
41  
42  
43  
44  
45  
46  
47  
48  
49  
50  
51  
52  
53  
54  
55  
56  
57  
58  
59  
60

Table 2. Median and average lengths of sickness absence episodes, median and average number of absence days yearly and median and average number of written sickness absence certificates yearly (2014–2016) by frequent attender status, n = 33 592 (patients with a sickness absence certified by a physician)

|                                    | Total length of sickness absences per year |    | Average length of a single sickness absence episode |    | Number of written sickness absence certificates |    |
|------------------------------------|--------------------------------------------|----|-----------------------------------------------------|----|-------------------------------------------------|----|
|                                    | av.                                        | md | av.                                                 | md | av.                                             | md |
| <b>2014</b><br>(n = 23 232)        | ***                                        |    | ***                                                 |    | ***                                             |    |
| 1yFA                               | 46.1                                       | 23 | 9.2                                                 | 4  | 5.0                                             | 4  |
| pFA                                | 42.6                                       | 25 | 7.1                                                 | 4  | 6.0                                             | 5  |
| non-FA                             | 14.4                                       | 6  | 7.7                                                 | 3  | 1.9                                             | 1  |
| <b>2015</b><br>(n = 25 151)        | ***                                        |    | ***                                                 |    | ***                                             |    |
| 1yFA                               | 41.2                                       | 14 | 11.7                                                | 4  | 3.5                                             | 3  |
| pFA                                | 51.4                                       | 29 | 8.0                                                 | 4  | 6.4                                             | 6  |
| non-FA                             | 14.0                                       | 5  | 7.5                                                 | 3  | 1.9                                             | 1  |
| <b>2016</b><br>(n = 38 054)        | ***                                        |    | ***                                                 |    | ***                                             |    |
| 1yFA                               | 28.0                                       | 10 | 9.1                                                 | 4  | 3.1                                             | 2  |
| pFA                                | 51.6                                       | 24 | 8.8                                                 | 4  | 5.9                                             | 5  |
| non-FA                             | 12.5                                       | 5  | 6.9                                                 | 3  | 1.8                                             | 1  |
| <b>2014 – 2016</b><br>(n = 56 042) | ***                                        |    | ***                                                 |    | ***                                             |    |
| 1yFA                               | 82.5                                       | 41 | 9.8                                                 | 4  | 8.4                                             | 7  |
| pFA                                | 138.4                                      | 96 | 7.9                                                 | 4  | 17.4                                            | 16 |
| non-FA                             | 17.7                                       | 7  | 7.3                                                 | 3  | 2.4                                             | 2  |

Kruskal-Wallis Test, \*\*\* =  $p < 0.001$ , av. = average, md = median

FA status was defined as the top decile of attenders (frequent attender 10%, FA10)

1yFA = Patients that were in the top decile of attenders in 2014

pFA = Patients that were in the top decile in all three study years (2014, 2015 and 2016)

non-FA = Patients that were never in the top decile were considered as a reference group, non-frequent attenders.

1  
2  
3 Throughout the study years long sickness absences (15 or more days yearly) were mostly due to musculoskeletal  
4 disorders (table 3). Injuries were the second largest diagnostic group for non-FA causing long absences while for 1yFA  
5 and pFA long absences were caused by mental and behavioural disorders. Musculoskeletal and mental disorders  
6 caused 64% of long sick-leave episodes for 1yFA and 63% for pFA, while for the non-FA group the proportion was 46%.  
7  
8  
9  
10  
11  
12  
13  
14  
15  
16  
17  
18  
19  
20  
21  
22  
23  
24  
25  
26  
27  
28  
29  
30  
31  
32  
33  
34  
35  
36  
37  
38  
39  
40  
41  
42  
43  
44  
45  
46  
47  
48  
49  
50  
51  
52  
53  
54  
55  
56  
57  
58  
59  
60

For peer review only

Table 3. Diagnostic codes associated with sickness absences of different lengths (for sickness absence certificates given by a physician), 2014 – 2016, n = number of sickness absence certificates

| ICD-10                                                                      | 1yFA, n = 19 506   |      |                     |      |                           |      | pFA, n = 10 117    |      |                     |      |                           |      | non-FA, n = 74 176   |      |                       |      |                           |      | FA status was defined as the top decile of attenders (frequent) |
|-----------------------------------------------------------------------------|--------------------|------|---------------------|------|---------------------------|------|--------------------|------|---------------------|------|---------------------------|------|----------------------|------|-----------------------|------|---------------------------|------|-----------------------------------------------------------------|
|                                                                             | 1-3 days, n = 8597 |      | 4-14 days, n = 8261 |      | 15 or more days, n = 2648 |      | 1-3 days, n = 4732 |      | 4-14 days, n = 4357 |      | 15 or more days, n = 1028 |      | 1-3 days, n = 39 566 |      | 4-14 days, n = 28 243 |      | 15 or more days, n = 6367 |      |                                                                 |
|                                                                             | n                  | (%)  | n                   | (%)  | n                         | (%)  | n                  | (%)  | n                   | (%)  | n                         | (%)  | n                    | (%)  | n                     | (%)  | n                         | (%)  |                                                                 |
| J00-J99 Diseases of the respiratory system                                  | 4020               | (47) | 1367                | (17) | 48                        | (2)  | 2150               | (45) | 810                 | (17) | 19                        | (2)  | 20 856               | (53) | 6570                  | (23) | 118                       | (2)  |                                                                 |
| M00-M99 Diseases of the musculoskeletal system and connective               | 1545               | (18) | 3678                | (45) | 1248                      | (47) | 1028               | (22) | 2042                | (47) | 483                       | (47) | 5585                 | (14) | 9820                  | (35) | 1982                      | (31) |                                                                 |
| S00-T98 Injury, poisoning and certain other consequences of external causes | 463                | (5)  | 1045                | (13) | 366                       | (14) | 221                | (5)  | 461                 | (11) | 136                       | (13) | 2100                 | (5)  | 4640                  | (16) | 1471                      | (23) |                                                                 |
| F00-F99 Mental and behavioural disorders                                    | 281                | (3)  | 809                 | (10) | 439                       | (17) | 165                | (4)  | 353                 | (8)  | 164                       | (16) | 829                  | (2)  | 2171                  | (8)  | 948                       | (15) |                                                                 |
| A00-B99 Certain infectious and parasitic diseases                           | 603                | (7)  | 145                 | (2)  | 4                         | (0)  | 255                | (5)  | 52                  | (1)  | 4                         | (0)  | 2749                 | (7)  | 792                   | (3)  | 35                        | (1)  |                                                                 |
| Others                                                                      | 1685               | (20) | 1217                | (15) | 543                       | (21) | 913                | (19) | 639                 | (15) | 222                       | (22) | 7447                 | (19) | 42 500                | (15) | 1813                      | (28) |                                                                 |

attender 10%, FA10)

1yFA = Patients that were in the top decile of attenders in 2014

pFA = Patients that were in the top decile in all three study years (2014, 2015 and 2016)

non-FA = Patients that were never in the top decile were considered as a reference group, non-frequent attenders

In the table are presented the five largest diagnostic groups that had the most sickness absence certificates written through the study years, arranged according to the number of certificates in each category

1  
2  
3 In the fully adjusted multinomial logistic regression model there was no significant difference between short absences  
4 between the groups (table 4). In the first year, pFA and 1yFA did not differ significantly in their risk of any length  
5 sickness absence. However, in the following years pFA had higher odds (OR 3.73, 95% CI 2.49–5.60 in 2016) of a long  
6 sickness absence than 1yFA. These groups did not differ in their risk for intermediate length absences. Throughout the  
7 study years both 1yFA (OR 1.44, 95% CI 1.23–1.69 in 2016) and pFA (OR 2.08, 95% CI 1.39–3.10 in 2016) had higher  
8 risk for intermediate length absences than non-FA. This association was enhanced when studying long absences. In  
9 2016 1yFA had higher odds (OR 2.95, 95% CI 2.50–3.49) for having a 15 or more days' absence than non-FA, as did pFA  
10 (OR 11.0, 95% CI 7.54–16.06).  
11  
12  
13  
14  
15  
16  
17  
18  
19  
20  
21  
22  
23  
24  
25  
26  
27  
28  
29  
30  
31  
32  
33  
34  
35  
36  
37  
38  
39  
40  
41  
42  
43  
44  
45  
46  
47  
48  
49  
50  
51  
52  
53  
54  
55  
56  
57  
58  
59  
60

Table 4. Lengths of sickness absences associated with frequent attender status in multinomial logistic regression (adjusted for sex, age, field of industry, cancer dg (C00-C97) and number of different ICD10-diagnoses given by physicians), n = 24 772 – 41 241

|                                 | 1yFA vs. non-FA |               | pFA vs. non-FA |               | pFA vs. 1yFA |             |
|---------------------------------|-----------------|---------------|----------------|---------------|--------------|-------------|
|                                 | OR              | 95 % CI       | OR             | 95 % CI       | OR           | 95 % CI     |
| <b>Sickness absences (2014)</b> |                 |               |                |               |              |             |
| no sickness absence (0 days)    | 1.0             |               | 1.0            |               | 1.0          |             |
| short (1-3 days)                | 1.15            | 0.91 - 1.45   | 1.06           | 0.61 - 1.85   | 0.93         | 0.52 - 1.67 |
| intermediate length (4-14 days) | 2.34            | 1.96 - 2.80   | 2.33           | 1.55 - 3.51   | 1.00         | 0.65 - 1.53 |
| long (15 or more days)          | 13.10           | 11.07 - 15.50 | 18.27          | 12.54 - 26.60 | 1.39         | 0.94 - 2.07 |
| <b>Sickness absences (2015)</b> |                 |               |                |               |              |             |
| no sickness absence (0 days)    | 1.0             |               | 1.0            |               | 1.0          |             |
| short (1-3 days)                | 1.20            | 1.01 - 1.42   | 1.32           | 0.72 - 2.40   | 1.09         | 0.59 - 2.04 |
| intermediate length (4-14 days) | 1.89            | 1.64 - 2.17   | 2.92           | 1.87 - 4.57   | 1.55         | 0.97 - 2.46 |
| long (15 or more days)          | 4.48            | 3.88 - 5.16   | 17.96          | 11.83 - 27.25 | 4.01         | 2.60 - 6.18 |
| <b>Sickness absences (2016)</b> |                 |               |                |               |              |             |
| no sickness absence (0 days)    | 1.0             |               | 1.0            |               | 1.0          |             |
| short (1-3 days)                | 1.08            | 0.89 - 1.29   | 0.93           | 0.54 - 1.59   | 0.86         | 0.49 - 1.52 |
| intermediate length (4-14 days) | 1.44            | 1.23 - 1.69   | 2.08           | 1.39 - 3.10   | 1.44         | 0.94 - 2.20 |
| long (15 or more days)          | 2.95            | 2.50 - 3.49   | 11.00          | 7.54 - 16.06  | 3.73         | 2.49 - 5.60 |

OR = Odds ratio, CI = Confidence interval, 1.0 = reference group,  $p < 0.001$  in all values

FA status was defined as the top decile of attenders (frequent attender 10%, FA10)

1yFA = Patients that were in the top decile of attenders in 2014

pFA = Patients that were in the top decile in all three study years (2014, 2015 and 2016)

non-FA = Patients that were never in the top decile were considered as a reference group, non-frequent attenders.



## DISCUSSION

Our results indicate that persistent frequent attenders have more and longer sickness absence episodes than other users of OH primary care. However, occasional frequent attenders also have more and longer sickness absences than non-frequent attenders, not only in their year of frequent attendance, but also in the following two years. Both frequent attender groups are also associated with increased risk of long sickness absences. These findings are novel and allow for better understanding of the risk for work disability associated with frequent attendance.

In a Finnish study on municipal employees sickness absence longer than 15 days was highly predictive of future disability pension and a Danish study showed that the longer the absence the higher the risk for disability pension in private sector employees. [25,31] In our study approximately 70% of persistent frequent attenders had a sickness absence >15 days yearly while for non-frequent attenders the proportion was a maximum of 10% through the study years. In 2014 almost two thirds of occasional frequent attenders had >15 days sickness absence and after two years follow up one third of occasional FA had >15 days of absence. Our results indicate that both persistent and occasional FA have more and longer sickness absences than an average user and thus might be at an increased risk of retirement due to disability.

Most long sickness absences were caused by diseases of the musculoskeletal system in all groups, but the proportions were higher for occasional and persistent FA than non-FA. The second largest group causing long absences was mental disorders for both occasional and persistent FA. Previous research indicates that musculoskeletal and mental disorders in particular cause recurrent sickness absences and that consultations for a specific illness tend to predict future consultations for the same illness group. [32,33] Detection of these individuals for follow up and necessary rehabilitative measures is important to maintain work ability. Additionally, in particular sick-leaves based on psychiatric and musculoskeletal reasons show increased risk in future for illness based retirement.[34,35] As our study shows that these diagnostic groups are associated with sickness absences of both occasional and persistent frequent attenders, both groups should be of special interest in OHS and GP setting treating working age patients.

Sickness absences predict future disability and retirement due to ill-health and these individuals should be identified for rehabilitation. This study indicates that both persistent and occasional frequent attenders are at risk of long sickness absences that in turn are associated with risk of disability pension. Vast use of services could be used as an early indicator for interventions to protect work ability. Also, as frequent attendance is mostly a self-limiting-condition

1  
2  
3 it has been argued whether occasional frequent attenders should be a target group for interventions at all.[36]  
4  
5 However, our results indicate that occasional frequent attenders' sickness absences are higher than average users'  
6  
7 even after the consultation rates have reduced indicating that they are also in need of rehabilitative evaluation  
8  
9 bearing in mind work ability. In addition to occasional frequent attenders' risk of future absences, also persistent  
10  
11 frequent attenders need attention. Persistent frequent attenders appear to be a group of patients whose needs have  
12  
13 not been met. Both these patient groups should be identified and careful diagnostic evaluation should be conducted  
14  
15 to enable meeting their needs and reducing absences.

16  
17 So far effective interventions on frequent attenders have been those based on in depth analysis of patient's reasons  
18  
19 for attendance and accordingly selected actions.[37] The measured outcomes have been mostly consultation  
20  
21 frequency or morbidity, but in the future, sickness absences and change in their frequency or length could be  
22  
23 measured as well. Early detection of individuals at risk of work disability based on readily available markers is crucial  
24  
25 for the implementation of timely interventions and rehabilitative measures to sustain patient's work ability.[35] Work  
26  
27 ability/disability and work relatedness could be also worth considering when discussing frequent attenders.  
28  
29 Determining how sickness absences are associated with frequent attendance is important due to the cost of  
30  
31 absenteeism on employers and society but also because of the effects on the individual – medically certified sickness  
32  
33 absences are also associated with mortality.[38,39]

34  
35 The strengths of this study are the large study population from an OHS provider including wide range of industries and  
36  
37 company sizes from both rural and urban areas. The employees are representative of the working population in  
38  
39 Finland including all ages, employment lengths and status, which allows generalization outside this particular service  
40  
41 provider. As no sampling was done, there should not be selection bias in the frequent attender groups. Also, the use  
42  
43 of medical records to define frequency of visits removes inaccuracy related to self-reported utilization.[40] The novel  
44  
45 longitudinal study design employed in this study allows for examining sickness absences also after frequent  
46  
47 attendance, which gives unique information on risks associated with frequent attendance.

48  
49 However, this study is limited by lack of information on occupational status and education since they are not available  
50  
51 from medical records. In addition, loss to follow up in OHS may be larger than in the GP setting since patients can be  
52  
53 lost due to an employment relationship that ends. We have conducted confirmatory analyses to ensure that we have  
54  
55 sufficient data also on 1–3 days' length sick-leaves. All sick-leave certificates of one of the largest employers on the  
56  
57

1  
2  
3 Pihlajalinn client lists are entered onto the Pihlajalinn sick-leave register. When comparing the proportions of  
4 different length absence episodes between this employer and all the data the results did not differ to a great degree.  
5  
6  
7  
8

## 9 10 **CONCLUSIONS**

11 Both occasional and persistent frequent attenders have higher odds for long and intermediate length absences, which  
12 suggests an elevated risk of future retirement due to disability. Frequent attenders should be identified in the working  
13 age population and sickness absences should be taken into account when planning frequent attender rehabilitation  
14 and interventions.  
15  
16  
17  
18

19 In future, a longer follow-up of sickness absences would be useful to see whether sickness absence rate eventually  
20 equalizes with the non-FA group. More understanding is needed of how frequent attendance is associated with  
21 disability and retirement due to ill-health.  
22  
23  
24  
25  
26  
27  
28  
29  
30

## 31 **FUNDING**

32 This study is part of the “Effectiveness and Indicators of Occupational Health Services” supported by the European  
33 Social Fund [reference number S20659].  
34  
35  
36  
37  
38  
39

## 40 **COMPETING INTERESTS**

41 The Authors declare that there is no conflict of interest.  
42  
43  
44  
45  
46

## 47 **ACKNOWLEDGEMENTS**

48 The authors acknowledge the participation of the occupational health staff in the study and all the individual clients  
49 who are part of this study.  
50  
51  
52  
53  
54  
55  
56  
57  
58  
59  
60

### **AUTHOR'S CONTRIBUTIONS**

JU conceptualized the study. TR, SA, NT, MS, MV and JU planned the analysis and NT analyzed the data. TR wrote the first draft, all authors commented on the draft and approved the final version.

### **AVAILABILITY OF DATA AND MATERIAL**

The data that support the findings of this study are available from Pihlajalinna Työterveys but restrictions apply to the availability of these data, which were used under license for the current study, and so are not publicly available. Data are however available from the authors upon reasonable request and with permission of Pihlajalinna Työterveys.

### **PATIENT AND PUBLIC INVOLVEMENT**

As it is a study of medical records, patients were not involved.

## REFERENCES

- 1 Gill D, Dawes M, Sharpe M, *et al.* GP frequent consulters: Their prevalence, natural history, and contribution to rising workload. *Br J Gen Pract* 1998;48:1856–7.
- 2 Smits FT, Brouwer HJ, ter Riet G, *et al.* Epidemiology of frequent attenders: a 3-year historic cohort study comparing attendance, morbidity and prescriptions of one-year and persistent frequent attenders. *BMC Public Health* 2009;9.
- 3 Patel S, Kai J, Atha C, *et al.* Clinical characteristics of persistent frequent attenders in primary care: Case-control study. *Fam Pract* 2015;32:624–30.
- 4 Droomers M, Westert GP. Do lower socioeconomic groups use more health services, because they suffer from more illnesses? *Eur J Public Health* 2004;14:311–3.
- 5 Bergh H, Baigi A, Marklund B. Consultations for injuries by frequent attenders are found to be medically appropriate from general practitioners' perspective. *Scand J Public Health* 2005;33:228–32.
- 6 Pymont C, Butterworth P. Longitudinal cohort study describing persistent frequent attenders in Australian primary healthcare. *BMJ Open* 2015;5:e008975.
- 7 Smits FT, Brouwer HJ, Zwinderman AH, *et al.* Why do they keep coming back? Psychosocial etiology of persistence of frequent attendance in primary care: A prospective cohort study. *J Psychosom Res* 2014;77:492–503.
- 8 Vedsted P, Christensen MB. Frequent attenders in general practice care: A literature review with special reference to methodological considerations. *Public Health* 2005;119:118–37.
- 9 Scaife B, Gill P, Heywood P, *et al.* Socio-economic characteristics of adult frequent attenders in general practice: secondary analysis of data. *Fam Pract* 2000;17:298–304.
- 10 Al-Windi A, Elmfeldt D, Svärdsudd K. The influence of sociodemographic characteristics on health care utilisation in a Swedish municipality. *Ups J Med Sci* 2004;109:33–42.
- 11 Karlsson H, Lehtinen V, Joukamaa M. Frequent Attenders of Finnish Public Primary Health-Care - Sociodemographic Characteristics and Physical Morbidity. *Fam Pract* 1994;11:424–30.

- 1  
2  
3 12 Bergh H, Baigi A, Månsson J, *et al.* Predictive factors for long-term sick leave and disability pension among  
4 frequent and normal attenders in primary health care over 5 years. *Public Health* 2007;121:25–33.  
5  
6  
7 13 Jyväsjärvi S, Keinänen-Kiukaanniemi S, Väisänen E, *et al.* Frequent attenders in a Finnish health centre:  
8 morbidity and reasons for encounter. *Scand J Prim Health Care* 1998;16:141–8.  
9  
10  
11 14 Luciano J V, Fernández A, Pinto-Meza A, *et al.* Frequent attendance in primary care: comparison and  
12 implications of different definitions. *Br J Gen Pract* 2010;60:e49-55.  
13  
14  
15 15 Laaksonen M, Rantala J, Järnefelt N, *et al.* Työkyvyttömyyden vuoksi menetetty työura. [*Loss of working career*  
16 *due to illness based retirement*] (In Finnish with english summary). Eläketurvakeskus 2016.  
17  
18  
19 16 Henderson M, Glozier N, Elliot KH. Editorials: Long term sickness absence. *BMJ Br Med J* 2005;330:802–3.  
20  
21  
22 17 Pekkala J, Blomgren J, Pietiläinen O, *et al.* Occupational class differences in diagnostic-specific sickness  
23 absence: a register-based study in the Finnish population. *BMC Public Health* 2017;17.doi: 10.1186/s12889-  
24 017-4674-0  
25  
26  
27  
28 18 Bergh H, Marklund B. Characteristics of frequent attenders in different age and sex groups in primary health  
29 care. *Scand J Prim Health Care* 2003;21:171–7.  
30  
31  
32 19 Karlsson H, Lehtinen V, Joukamaa M. Psychiatric morbidity among frequent attender patients in primary care.  
33 *Gen Hosp Psychiatry* 1995;17:19–25.  
34  
35  
36 20 Reho T, Atkins S, Talola N, *et al.* Frequent attenders in occupational health primary care – a cross-sectional  
37 study. *Scand J Public Health* Published Online First 27 May 2018.  
38  
39  
40  
41  
42  
43  
44  
45 21 Kimanen A, Rautio M, Manninen P, *et al.* Primary care visits to occupational health physicians and nurses in  
46 Finland. *Scand J Public Health* 2011;39:525–32.  
47  
48  
49 22 Ikonen A, Räsänen K, Manninen P, *et al.* Work-Related Primary Care in Occupational Health Physician's  
50 Practice. *J Occup Rehabil* 2012;22:88–96.  
51  
52  
53 23 Hultin H, Lindholm C, Möller J, *et al.* Is There an Association between Long-Term Sick Leave and Disability  
54 Pension and Unemployment beyond the Effect of Health Status? – A Cohort Study. *PLoS One* 2012;7:e35614.  
55  
56  
57  
58  
59  
60

- 1  
2  
3 24 Hultin H, Lindholm C, Malfert M, *et al.* Short-term sick leave and future risk of sickness absence and  
4 unemployment - the impact of health status. *BMC Public Health* 2012;12:861.  
5  
6  
7 25 Lund T, Kivimäki M, Labriola M, *et al.* Using administrative sickness absence data as a marker of future  
8 disability pension: The prospective DREAM study of Danish private sector employees. *Occup Environ Med*  
9 2008;65:28–31.  
10  
11  
12  
13 26 Van Oostrom S, Driessen M, de Vet H, *et al.* Workplace interventions for preventing work disability (Review).  
14 *Cochrane Database of Systematic Reviews* 2009. doi: DOI: 10.1002/14651858.CD006955.pub2  
15  
16  
17  
18 27 Taimela S, Justen S, Aronen P, *et al.* An occupational health intervention programme for workers at high risk  
19 for sickness absence. Cost effectiveness analysis based on a randomised controlled trial. *Occup Env Med*  
20 2008;65:242–8.  
21  
22  
23  
24 28 Kant I, Jansen NWH, van Amelsvoort LGPM, *et al.* Structured early consultation with the occupational  
25 physician reduces sickness absence among office workers at high risk for long-term sickness absence: A  
26 randomized controlled trial. *J Occup Rehabil* 2008;18:79–86.  
27  
28  
29  
30 29 Lappalainen K, Aminoff M, Hakulinen H, *et al.* *Työterveyshuolto Suomessa vuonna 2015 [Occupational*  
31 *healthcare in Finland 2015 Report] (In Finnish with english summary)*. Työterveyslaitos 2016.  
32  
33  
34  
35 30 Laaksonen M, He L, Pitkäniemi J. The durations of past sickness absences predict future absence episodes. *J*  
36 *Occup Environ Med* 2013;55:87–92.  
37  
38  
39  
40 31 Kivimäki M, Forma P, Wikström J, *et al.* Sickness absence as a risk marker of future disability pension: the 10-  
41 town study. *J Epidemiol Community Heal* 2004;58:710–1.  
42  
43  
44 32 Roelen C, Koopmans P, Anema J, *et al.* Recurrence of Medically Certified Sickness Absence According to  
45 Diagnosis: A Sickness Absence Register Study. *J occupational Rehabil* 2010;20:113–21.  
46  
47  
48 33 Jordan K, Ong BN, Croft P. Previous consultation and self reported health status as predictors of future  
49 demand for primary care. *J Epidemiol Community Heal* 2003;57:109–13.  
50  
51  
52  
53 34 Kivimäki M, Ferrie JE, Hagberg J, *et al.* Diagnosis-specific sick leave as a risk marker for disability pension in a  
54 Swedish population. *J Epidemiol Community Heal* 2007;61:915–20.  
55  
56  
57  
58  
59  
60

- 1  
2  
3 35 Alexanderson K, Kivimäki M, Ferrie JE, *et al.* Diagnosis-specific sick leave as a long-term predictor of disability  
4 pension: A 13-year follow-up of the GAZEL cohort study. *J Epidemiol Community Heal* 2012;66:155–9.  
5  
6  
7 36 Smits FTM, Brouwer HJ, van Weert HCP, *et al.* Predictability of persistent frequent attendance: A historic 3-  
8 year cohort study. *Br J Gen Pract* 2009;59:114–9.  
9  
10  
11 37 Haroun D, Smits F, van Etten-Jamaludin F, *et al.* The effects of interventions on quality of life, morbidity and  
12 consultation frequency in frequent attenders in primary care: A systematic review. *Eur J Gen Pract*  
13 2016;22:71–82.  
14  
15  
16  
17 38 Kivimäki M, Head J, Ferrie JE, *et al.* Sickness absence as a global measure of health: evidence from mortality in  
18 the Whitehall II prospective cohort study. *BMJ* 2003;327.  
19  
20  
21  
22 39 Anema JR, van der Beek AJ. Medically certified sickness absence. *BMJ* 2008;337:a1174.  
23  
24  
25 40 Bellón JÁ, Lardelli P, De J, *et al.* Validity of self reported utilisation of primary health care services in an urban  
26 population in Spain. *J Epidemiol Community Heal* 2000;54:544–51.  
27  
28  
29  
30  
31

## 32 FIGURES

33  
34 Figure 1. Flow of the study population  
35  
36  
37  
38  
39  
40  
41  
42  
43  
44  
45  
46  
47  
48  
49  
50  
51  
52  
53  
54  
55  
56  
57  
58  
59  
60



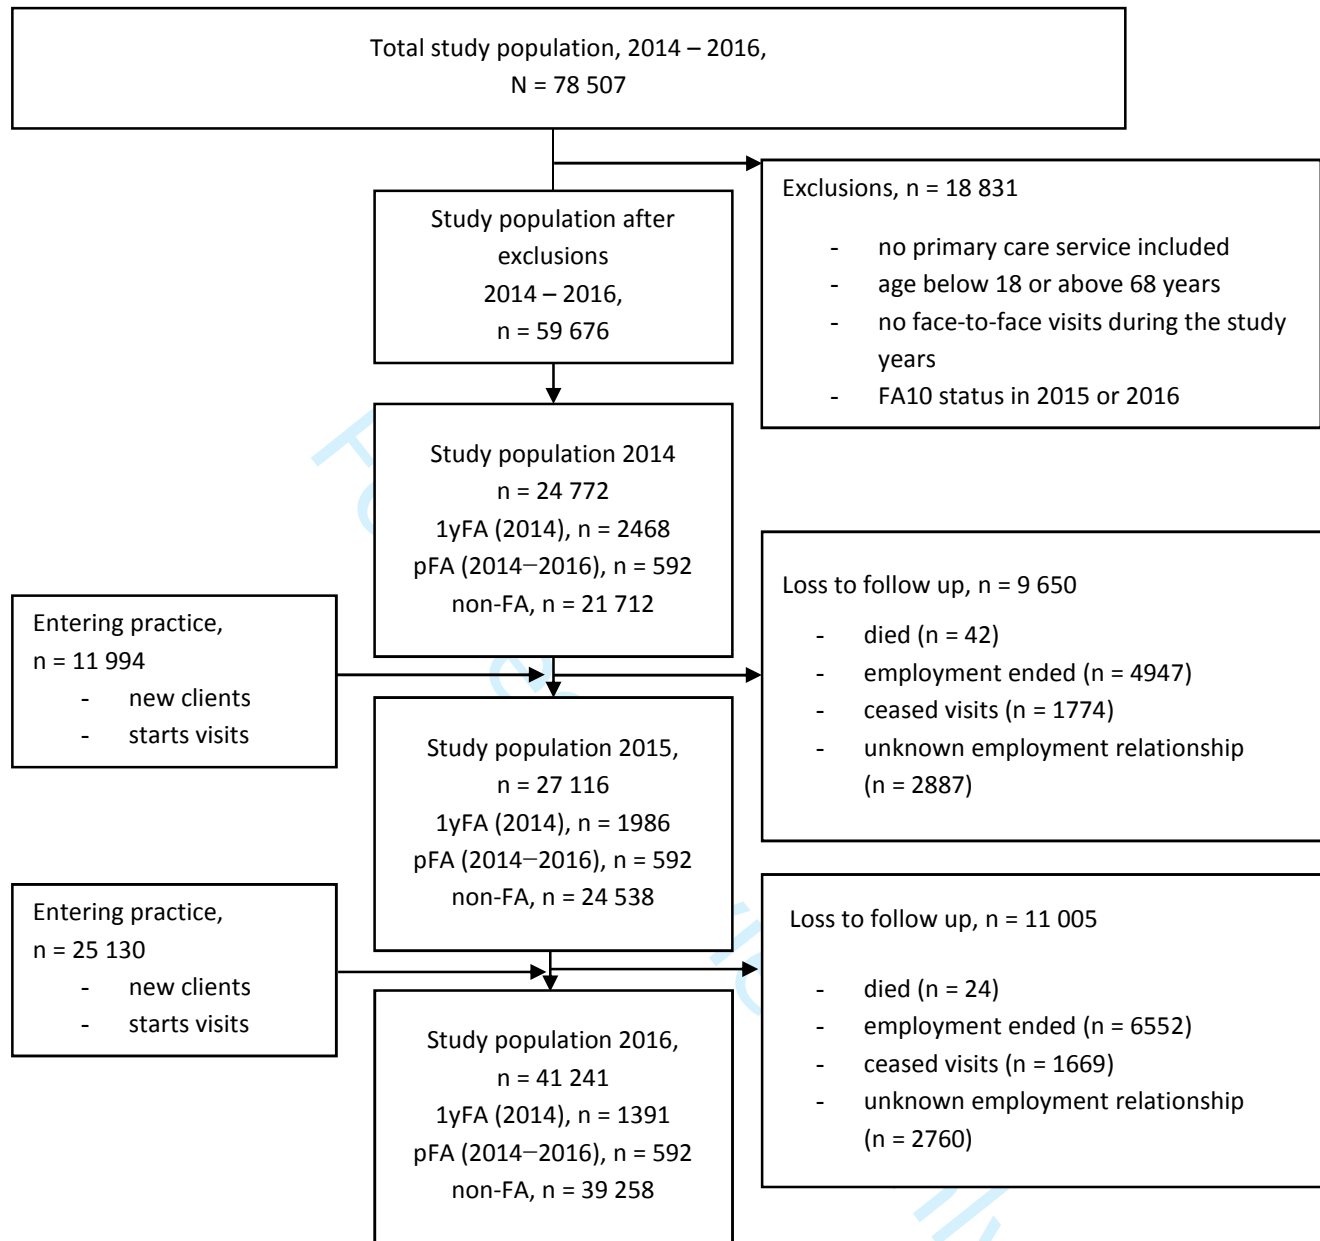

Figure 1. Flow of the study population

1yFA = Patients that were in the top decile of attenders in 2014

pFA = Patients that were in the top decile in all three study years (2014, 2015 and 2016)

non-FA = Patients that were never in the top decile were considered as a reference group, non-frequent attenders

## STROBE Statement—checklist of items that should be included in reports of observational studies

|                              | Item No. | Recommendation                                                                                                                                                                                                                                                                                                                                                                                                                                                         | Page No. |
|------------------------------|----------|------------------------------------------------------------------------------------------------------------------------------------------------------------------------------------------------------------------------------------------------------------------------------------------------------------------------------------------------------------------------------------------------------------------------------------------------------------------------|----------|
| <b>Title and abstract</b>    | 1        | (a) Indicate the study's design with a commonly used term in the title or the abstract                                                                                                                                                                                                                                                                                                                                                                                 | 2        |
|                              |          | (b) Provide in the abstract an informative and balanced summary of what was done and what was found                                                                                                                                                                                                                                                                                                                                                                    | 2        |
| <b>Introduction</b>          |          |                                                                                                                                                                                                                                                                                                                                                                                                                                                                        |          |
| Background/rationale         | 2        | Explain the scientific background and rationale for the investigation being reported                                                                                                                                                                                                                                                                                                                                                                                   | 3-4      |
| Objectives                   | 3        | State specific objectives, including any prespecified hypotheses                                                                                                                                                                                                                                                                                                                                                                                                       | 4        |
| <b>Methods</b>               |          |                                                                                                                                                                                                                                                                                                                                                                                                                                                                        |          |
| Study design                 | 4        | Present key elements of study design early in the paper                                                                                                                                                                                                                                                                                                                                                                                                                | 5        |
| Setting                      | 5        | Describe the setting, locations, and relevant dates, including periods of recruitment, exposure, follow-up, and data collection                                                                                                                                                                                                                                                                                                                                        | 5-6      |
| Participants                 | 6        | (a) <i>Cohort study</i> —Give the eligibility criteria, and the sources and methods of selection of participants. Describe methods of follow-up<br><i>Case-control study</i> —Give the eligibility criteria, and the sources and methods of case ascertainment and control selection. Give the rationale for the choice of cases and controls<br><i>Cross-sectional study</i> —Give the eligibility criteria, and the sources and methods of selection of participants | 5-6      |
|                              |          | (b) <i>Cohort study</i> —For matched studies, give matching criteria and number of exposed and unexposed<br><i>Case-control study</i> —For matched studies, give matching criteria and the number of controls per case                                                                                                                                                                                                                                                 |          |
| Variables                    | 7        | Clearly define all outcomes, exposures, predictors, potential confounders, and effect modifiers. Give diagnostic criteria, if applicable                                                                                                                                                                                                                                                                                                                               | 6        |
| Data sources/<br>measurement | 8*       | For each variable of interest, give sources of data and details of methods of assessment (measurement). Describe comparability of assessment methods if there is more than one group                                                                                                                                                                                                                                                                                   | 5-6      |
| Bias                         | 9        | Describe any efforts to address potential sources of bias                                                                                                                                                                                                                                                                                                                                                                                                              | 5-6, 16  |
| Study size                   | 10       | Explain how the study size was arrived at                                                                                                                                                                                                                                                                                                                                                                                                                              | 5        |

Continued on next page

|                        |     |                                                                                                                                                                                                                        |                |
|------------------------|-----|------------------------------------------------------------------------------------------------------------------------------------------------------------------------------------------------------------------------|----------------|
| Quantitative variables | 11  | Explain how quantitative variables were handled in the analyses. If applicable, describe which groupings were chosen and why                                                                                           | 5-6            |
| Statistical methods    | 12  | (a) Describe all statistical methods, including those used to control for confounding                                                                                                                                  | 6              |
|                        |     | (b) Describe any methods used to examine subgroups and interactions                                                                                                                                                    | 6              |
|                        |     | (c) Explain how missing data were addressed                                                                                                                                                                            | 16-17          |
|                        |     | (d) <i>Cohort study</i> —If applicable, explain how loss to follow-up was addressed                                                                                                                                    | 16-17          |
|                        |     | (e) <i>Case-control study</i> —If applicable, explain how matching of cases and controls was addressed<br><i>Cross-sectional study</i> —If applicable, describe analytical methods taking account of sampling strategy | 5, 16-17       |
| <b>Results</b>         |     |                                                                                                                                                                                                                        |                |
| Participants           | 13* | (a) Report numbers of individuals at each stage of study—eg numbers potentially eligible, examined for eligibility, confirmed eligible, included in the study, completing follow-up, and analysed                      | 5, 7, figure 1 |
|                        |     | (b) Give reasons for non-participation at each stage                                                                                                                                                                   | 5, 7, figure 1 |
|                        |     | (c) Consider use of a flow diagram                                                                                                                                                                                     | 7, figure 1    |
| Descriptive data       | 14* | (a) Give characteristics of study participants (eg demographic, clinical, social) and information on exposures and potential confounders                                                                               | 7-8, 12        |
|                        |     | (b) Indicate number of participants with missing data for each variable of interest                                                                                                                                    | 5              |
|                        |     | (c) <i>Cohort study</i> —Summarise follow-up time (eg, average and total amount)                                                                                                                                       | 7              |
| Outcome data           | 15* | <i>Cohort study</i> —Report numbers of outcome events or summary measures over time                                                                                                                                    | 7-9            |
|                        |     | <i>Case-control study</i> —Report numbers in each exposure category, or summary measures of exposure                                                                                                                   |                |
|                        |     | <i>Cross-sectional study</i> —Report numbers of outcome events or summary measures                                                                                                                                     |                |
| Main results           | 16  | (a) Give unadjusted estimates and, if applicable, confounder-adjusted estimates and their precision (eg, 95% confidence interval). Make clear which confounders were adjusted for and why they were included           | 13-14          |
|                        |     | (b) Report category boundaries when continuous variables were categorized                                                                                                                                              | 6              |
|                        |     | (c) If relevant, consider translating estimates of relative risk into absolute risk for a meaningful time period                                                                                                       | N/A            |

Continued on next page

|                          |    |                                                                                                                                                                            |       |
|--------------------------|----|----------------------------------------------------------------------------------------------------------------------------------------------------------------------------|-------|
| Other analyses           | 17 | Report other analyses done—eg analyses of subgroups and interactions, and sensitivity analyses                                                                             | 9-10  |
| <b>Discussion</b>        |    |                                                                                                                                                                            |       |
| Key results              | 18 | Summarise key results with reference to study objectives                                                                                                                   | 15    |
| Limitations              | 19 | Discuss limitations of the study, taking into account sources of potential bias or imprecision. Discuss both direction and magnitude of any potential bias                 | 16-17 |
| Interpretation           | 20 | Give a cautious overall interpretation of results considering objectives, limitations, multiplicity of analyses, results from similar studies, and other relevant evidence | 16-17 |
| Generalisability         | 21 | Discuss the generalisability (external validity) of the study results                                                                                                      | 17    |
| <b>Other information</b> |    |                                                                                                                                                                            |       |
| Funding                  | 22 | Give the source of funding and the role of the funders for the present study and, if applicable, for the original study on which the present article is based              | 17    |

\*Give information separately for cases and controls in case-control studies and, if applicable, for exposed and unexposed groups in cohort and cross-sectional studies.

**Note:** An Explanation and Elaboration article discusses each checklist item and gives methodological background and published examples of transparent reporting. The STROBE checklist is best used in conjunction with this article (freely available on the Web sites of PLoS Medicine at <http://www.plosmedicine.org/>, Annals of Internal Medicine at <http://www.annals.org/>, and Epidemiology at <http://www.epidem.com/>). Information on the STROBE Initiative is available at [www.strobe-statement.org](http://www.strobe-statement.org).

# BMJ Open

## Occasional and persistent frequent attenders and sickness absences in occupational health primary care – a longitudinal study in Finland

|                                 |                                                                                                                                                                                                                                                                                                                                                                                                                                                                                                                                                                                                                                                                                                 |
|---------------------------------|-------------------------------------------------------------------------------------------------------------------------------------------------------------------------------------------------------------------------------------------------------------------------------------------------------------------------------------------------------------------------------------------------------------------------------------------------------------------------------------------------------------------------------------------------------------------------------------------------------------------------------------------------------------------------------------------------|
| Journal:                        | <i>BMJ Open</i>                                                                                                                                                                                                                                                                                                                                                                                                                                                                                                                                                                                                                                                                                 |
| Manuscript ID                   | bmjopen-2018-024980.R1                                                                                                                                                                                                                                                                                                                                                                                                                                                                                                                                                                                                                                                                          |
| Article Type:                   | Research                                                                                                                                                                                                                                                                                                                                                                                                                                                                                                                                                                                                                                                                                        |
| Date Submitted by the Author:   | 23-Oct-2018                                                                                                                                                                                                                                                                                                                                                                                                                                                                                                                                                                                                                                                                                     |
| Complete List of Authors:       | Reho, Tiia; Tampereen yliopisto Laaketieteen yksikko, Faculty of Medicine and Life Sciences; Pihlajalinna, Työterveys<br>Atkins, Salla; Tampereen yliopisto Laaketieteen yksikko, New Social Research and Faculty of Social Sciences; Karolinska Institutet, Department of Public Health Sciences<br>Talola, Nina; Tampereen yliopisto Laaketieteen yksikko, Faculty of Medicine and Life Sciences<br>Sumanen, Markku; Tampereen yliopisto Laaketieteen yksikko, Faculty of Medicine and Life Sciences<br>Viljamaa, Mervi; Pihlajalinna, Työterveys<br>Uitti, Jukka; Tampereen yliopisto Laaketieteen yksikko, Faculty of Medicine and Life Sciences; Työterveyslaitos Tampereen aluetoimipiste |
| <b>Primary Subject Heading</b>: | Public health                                                                                                                                                                                                                                                                                                                                                                                                                                                                                                                                                                                                                                                                                   |
| Secondary Subject Heading:      | Occupational and environmental medicine                                                                                                                                                                                                                                                                                                                                                                                                                                                                                                                                                                                                                                                         |
| Keywords:                       | sickness absence, occupational health, PRIMARY CARE, longitudinal studies, PUBLIC HEALTH, health care utilisation                                                                                                                                                                                                                                                                                                                                                                                                                                                                                                                                                                               |
|                                 |                                                                                                                                                                                                                                                                                                                                                                                                                                                                                                                                                                                                                                                                                                 |

SCHOLARONE™  
Manuscripts

1  
2  
3 Research article

4  
5 Corresponding author

6 Tiia TM Reho

7 University of Tampere, Faculty of Medicine and Life Sciences

8 PB 100

9 FI-33014 UNIVERSITY OF TAMPERE

10 FINLAND

11 Email: [tiia.reho@gmail.com](mailto:tiia.reho@gmail.com)

12 +358504512123  
13  
14

15 Occasional and persistent frequent attenders and sickness absences in occupational health primary  
16 care – a longitudinal study in Finland  
17  
18

19 Tiia TM Reho <sup>1,2</sup> MD

20 Salla A Atkins <sup>3,4</sup> PhD

21 Nina Talola <sup>1</sup> Msc

22 Markku PT Sumanen<sup>1</sup> MD, PhD

23 Mervi Viljamaa <sup>2</sup> MD, PhD

24 Jukka Uitti <sup>1,5,6</sup> MD, PhD  
25  
26  
27  
28  
29  
30

31 1 University of Tampere, Faculty of Medicine and Life Sciences, Tampere, Finland

32 2 Pihlajalinna Työterveys, Tampere, Finland

33 3 University of Tampere, New Social Research and Faculty of Social Sciences, Tampere, Finland

34 4 Karolinska Institutet, Department of Public Health Sciences, Stockholm, Sweden

35 5 Finnish Institute of Occupational Health, Tampere, Finland

36 6 Clinic of Occupational Medicine, Tampere University Hospital, Tampere, Finland  
37  
38  
39  
40  
41  
42  
43  
44

45 *Key words:* sickness absence; occupational health; primary health care; longitudinal studies; public health; access to health

46 care  
47  
48  
49  
50  
51  
52  
53  
54  
55  
56  
57  
58  
59  
60

## ABSTRACT

*Objectives* Frequent attenders create a substantial portion of primary care workload but little is known about frequent attenders' sickness absences. The aim of the study is to investigate how occasional and persistent frequent attendance is associated with sickness absences among the working population in occupational health (OH) primary care.

*Setting and participants* This is a longitudinal study using medical record data (2014–2016) from an OH care provider in Finland. In total, 59 676 patients were included and categorized into occasional and persistent frequent attenders (FA) or non-frequent attenders (non-FA). Sick-leave episodes and their lengths were collected along with associated diagnostic codes. Logistic regression was used to analyze associations between FA status and sick-leaves of different lengths (1-3, 4-14 and 15 or more days).

*Results* Both occasional and persistent FA had more and longer duration of sick-leave than non-FA through the study years. Persistent frequent attenders had consistently high absence rates. Occasional FA had elevated absence rates even two years after their frequent attendance period. Persistent FAs (OR=11 95% CI 7.54-16.06 in 2016) and occasional-FAs (OR=2.95 95% CI 2.50-3.49 in 2016) were associated with long (15 or more days) sickness absence when compared with non-FA. Both groups of FA's had an increased risk of long term sick-leave indicating a risk of disability pension.

*Conclusion* Both occasional and persistent frequent attenders should be identified in primary care units caring for working age patients. As frequent attendance is associated with long sickness absences and possibly disability pensions, rehabilitation should be directed at this group to prevent work disability.

## STRENGTHS AND LIMITATIONS OF THIS STUDY

- The study relies on large nationwide data including employees from rural and urban areas and public and private employers
- The longitudinal study design allows for examining sickness absences also after consultation rates reduce
- The use of medical records to define frequency of visits and sickness absences removes inaccuracy related to self-reporting

1  
2  
3  
4  
5  
6  
7  
8  
9  
10  
11  
12  
13  
14  
15  
16  
17  
18  
19  
20  
21  
22  
23  
24  
25  
26  
27  
28  
29  
30  
31  
32  
33  
34  
35  
36  
37  
38  
39  
40  
41  
42  
43  
44  
45  
46  
47  
48  
49  
50  
51  
52  
53  
54  
55  
56  
57  
58  
59  
60

- The study lacks information on occupational status, education and use of other service providers as these are not available from occupational health medical records
- Loss to follow up in OHS is larger than in the GP setting since patients can be lost due to an employment relationship that ends

For peer review only



## INTRODUCTION

Frequent attendance is a costly and burdensome phenomenon for healthcare providers, society and patients. Patients, often referred to as frequent attenders (FA), visit healthcare units repeatedly and constitute a substantial portion of both physician's time and healthcare costs.[1,2] On the other hand, FAs appear to be a vulnerable group of patients that suffer from multimorbidity, medically unexplained symptoms and low quality of life.[3–5] For most patients frequent attendance is transient while a group of persistent FAs continue recurrent visits for extended periods of time.[2,6] Research indicates that persistent FAs often suffer from some combination of somatic, psychological and social problems and are prone to anxiety and worry more than transient FAs are.[3,6,7]

Frequent attenders in general practice (GP) are often unemployed or (disability)pensioners but to date there is little known about the relationship between frequent attendance and sickness absences among the working population. [8–11] The available research indicates that chronic disease and negative life events are predictive of long term sickness absence among one year FAs.[12] A Swedish study in GP setting showed that 19% of FA's versus 6% of non-FA's received a long term sickness absence or disability pension over 5 years' follow-up.[12] Also being on sick-leave or on disability pension increased the mean number of visits in GP setting and was associated with being a frequent attender.[10,13,14] However, there are no data available on how occasional and persistent FAs differ in terms of sick-leave and if frequent attendance is predictive of future sickness absences. Little is also known about the diagnostic groups associated with FAs' sickness absences and whether these patterns are similar for occasional and persistent frequent attenders. There is little research on working age patients alone, and most research concerning working age patients is conducted in GP setting. OH primary care in Finland is an ideal place to study working age patients solely as OHs primary care is available to 90% of the working population and often used as the sole primary care provider. [15,16]

In Finland the proportion of time spent on disability pension is increasingly due to mental disorders, in particular depression.[17] In turn, musculoskeletal and mental disorders are the most common causes for long term sickness absences.[18,19] Both diagnostic groups are also associated with frequent attendance in the Nordic countries in a GP setting and in occupational health (OH) primary care. [20–22] Research shows that chronic illnesses that diminish work ability and symptoms related to work are associated with visiting OH primary care.[23] In the same setting, in almost half of the visits caused by mental reasons and in one third of visits due to musculoskeletal reasons, a sickness absence

1  
2  
3 certificate was given.[24] These associations suggest that FAs could be a potential risk group for sickness absences and  
4  
5 work disability. To grasp the full picture of frequent attendance and the impact on society and individuals we need to  
6  
7 know if and how sickness absenteeism is associated with high use of services.  
8  
9

10 Understanding the association of frequent attendance with sickness absenteeism is vital to enable healthcare providers to  
11  
12 use frequent attendance as an early marker for necessary rehabilitation. It has been shown that short term sick-leaves are  
13  
14 associated with long sickness absences and long sick-leaves in turn predict disability.[25–27] If frequent attendance is  
15  
16 predictive of future absences this could be used to trigger early supportive measures possibly even before the next  
17  
18 occurrence of sickness absence. We need to define whether both occasional and persistent FAs are at equal risk of  
19  
20 sickness absences to define appropriate groups for OH interventions where the aim is to prevent sickness absences and  
21  
22 disability. Workplace interventions and OH intervention programs on individuals at risk of sickness absences indicate both  
23  
24 cost effectiveness and reduction in sickness absence days.[28–30] However, current interventions are often designed  
25  
26 around sickness absences and do not take into account patterns of frequent use. Interventions should be aimed at the  
27  
28 group of FAs who are also at risk of long term sickness absences to ensure both resource management and disability  
29  
30 prevention.  
31  
32

33 We aim to determine how sickness absences of different lengths are associated with occasional and persistent frequent  
34  
35 attendance.  
36  
37  
38  
39  
40  
41  
42  
43  
44  
45  
46  
47  
48  
49  
50  
51  
52  
53  
54  
55  
56  
57  
58  
59  
60

## MATERIAL AND METHODS

### Study setting and design

In Finland, OH is an important primary care provider for the working population that functions in parallel with municipal and private primary care services. Occupational health services (OHS) are divided into obligatory preventive services and voluntary primary care services of which the latter is, however, well used and covers up to 90% of employees [16]. In the Finnish OH primary care, in addition to work-related issues and issues related to work ability, acute and chronic illnesses and typical primary care issues are treated. OHS primary care is often used as the sole primary care provider for the working population.[15] Most professionals in OHS are specialized in occupational health. Physiotherapists and psychologists can be consulted after a referral from a nurse or a physician.

This study is conducted using data from Pihlajalinna Työterveys – a large nationwide private OHS provider. The clientele of Pihlajalinna includes employees from both municipal and private employers, with representation from different company sizes and industries. The study is a longitudinal register study using electronic medical record data of Pihlajalinna covering years 2014–2016.

### Data collection

Data used for the study included all visits to healthcare professionals and diagnostic codes (International Classification of Diseases, 10<sup>th</sup> edition, ICD-10) registered for the visit through the study years 2014–2016. The data also included sickness absences, employee sex and age and employers' industry and size. Pihlajalinna collected the data and the data was sent in pseudonymized format to the University of Tampere for analysis. There were no missing data.

The data initially comprised 78 507 patients. No sampling was done during data collection. The study population was limited to employees who had visited the OH unit during the study years and were aged 18–68 years. Only face-to-face contacts were included and occupational safety check-ups and other mandatory check-ups not initiated by the patient were excluded based on invoice codes. Patients who had no employer provided primary care service plan were also excluded from the study. After these exclusions the study population comprised 59 676 patients. Diagnostic codes, using ICD-10, are mandatory for visits to a physician. We used the first (i.e. the main) ICD-10 diagnosis registered for each visit in

1  
2  
3 this study. Most employers had all employees' sickness absence certificates are entered into the medical records through  
4 a portal, even though they were certified outside the OHS.  
5  
6  
7

## 8 **Statistical analysis**

9  
10 We defined FA as the top decile of attenders.[2,14] We used visits to physicians, nurses, physiotherapists and  
11 psychologists to define frequent attenders and with our definition FA visited OH units 8 or more times yearly.[22] The  
12 general characteristics of FAs in OHS is described previously and we also made a secondary analysis of frequent attenders  
13 using only visits to the physician, which did not alter the results.[22] Patients being in the top decile in 2014 but not in any  
14 other study year were categorized as 1-year-FA (1yFA) representing occasional FA. Patients who were in the top decile  
15 during all three study years (2014–2016) were categorized as persistent-FA (pFA). Patients who were not in the top decile  
16 in any of the study years but who had at least once contact with the OHS during the study years were used as a reference  
17 group (non-frequent attenders, non-FA). To avoid confounding, patients who were FA in 2015 or 2016 but not during all  
18 three study years were excluded as they might have entered the practice during the study period, and without knowledge  
19 of their previous service use, they might have been wrongly categorized.  
20  
21  
22  
23  
24  
25  
26  
27  
28  
29  
30

31 We divided the study population by sex and into four age categories (18–34, 35–44, 45–54, 55–68) for characterization.  
32 Employer industries were categorized according to Statistics Finland /Statistical Classification of economic activities in the  
33 European Community (TOL2008/Nace Rev.2). We analyzed sickness absences with different categorizations. First we  
34 divided sickness absence episodes into groups according to the length: no absence, short (1–3 d), intermediate (4–14 d)  
35 and long (15 d or more) absence.[31] In addition, we looked at the total number of sickness absence days per year with  
36 two different categorizations (0, 1–15 or more than 15 days per year and short (1–3 d) intermediate (4–14 d) and long (15  
37 d or more)). [32] When examining sickness absences yearly we included self-certified and nurse-certified sick-leaves. In the  
38 analysis of diagnostic codes associated with sickness absenteeism, only physician certified sick-leaves were used.  
39  
40  
41  
42  
43  
44  
45  
46  
47

48 Chi square and Kruskal-Wallis –tests were used to test for significant differences between groups. Multinomial logistic  
49 regression was used to analyze associations of the dependent variable FA-status (1yFA, pFA and non-FA) with the  
50 independent variable (occurrence of a sick-leave episode and number of sickness absence days yearly). The results were  
51 adjusted for sex, age, industry, number of ICD-10 diagnoses and existence of cancer diagnosis (C00-C97). Odds ratios (OR)  
52  
53  
54  
55  
56  
57  
58  
59  
60

1  
2  
3 with 95% confidence intervals (CI) were determined. Statistical analyses were conducted in University of Tampere using  
4  
5 IBM SPSS Statistics version 23. In all analyses P values less than 0.05 were considered statistically significant.  
6  
7

### 8 **Ethical considerations**

9  
10 The National Institute of Health and Welfare (THL/556/5.05.OO/2016) and the ethics committee of Pirkanmaa Hospital  
11  
12 District (ETL R16041) approved the study. According to Finnish legislation individual consent was not needed as this is a  
13  
14 large-scale register-based study where no single participant can be recognized.  
15

### 16 **Patient and public involvement**

17  
18  
19 As it is a study of medical records, patients were not involved.  
20  
21  
22  
23  
24  
25  
26  
27  
28  
29  
30  
31  
32  
33  
34  
35  
36  
37  
38  
39  
40  
41  
42  
43  
44  
45  
46  
47  
48  
49  
50  
51  
52  
53  
54  
55  
56  
57  
58  
59  
60

## RESULTS

Our study population constituted 59 676 individuals during the study years (2014–2016). The population included 592 pFA and 2468 1yFA in 2014. The latter group diminished due to loss for follow-up as time went on so that in 2015 there were 1986 individuals and in 2016 1391 individuals in 1yFA group. Figure 1 shows the flow of the study population. Table 1 below shows descriptive statistics of 1yFA, pFA and non-FA during the study years. There were more women than men in both 1yFA and pFA throughout the study years. Over 90% of the pFA group received a sick-leave certificate from a physician every year and 90% of the 1yFA group received one in the first year. Thereafter of the 1yFA group, 70% or more received a sick-leave certificate from a physician during the study. In 2016 almost 70% of pFA and 30% of 1yFA had a sick-leave longer than 15 days while only 9% of non-FA had such a long absence.

*[Insert Figure 1. Flow of the study population]*

Table 1. Characteristics of by status (1yFA, pFA and non-FA) yearly (2014–2016), n = 59 676

|                                         | 2014, n = 24772  |      |                |      |                     |      | 2015, n = 27116  |      |                |      |                     |      | 2016, n = 41241  |      |                |      |                     |      |
|-----------------------------------------|------------------|------|----------------|------|---------------------|------|------------------|------|----------------|------|---------------------|------|------------------|------|----------------|------|---------------------|------|
|                                         | 1yFA<br>n = 2468 |      | pFA<br>n = 592 |      | non-FA<br>n = 21712 |      | 1yFA<br>n = 1986 |      | pFA<br>n = 592 |      | non-FA<br>n = 24538 |      | 1yFA<br>n = 1391 |      | pFA<br>n = 592 |      | non-FA<br>n = 39258 |      |
|                                         | n                | (%)  | n              | (%)  | n                   | (%)  | n                | (%)  | n              | (%)  | n                   | (%)  | n                | (%)  | n              | (%)  | n                   | (%)  |
| <b>Sex</b>                              |                  |      |                |      |                     |      |                  |      |                |      |                     |      |                  |      |                |      |                     |      |
| Male                                    | 1 134            | (46) | 262            | (44) | 12 783              | (59) | 924              | (46) | 262            | (44) | 14 628              | (60) | 679              | (49) | 262            | (44) | 22 277              | (57) |
| Female                                  | 1 334            | (54) | 330            | (56) | 8 929               | (41) | 1 062            | (54) | 330            | (56) | 9 910               | (40) | 712              | (51) | 330            | (56) | 16 981              | (43) |
| <b>Age</b>                              |                  |      |                |      |                     |      |                  |      |                |      |                     |      |                  |      |                |      |                     |      |
| 18–34                                   | 704              | (29) | 130            | (22) | 6 751               | (31) | 501              | (25) | 121            | (20) | 7 434               | (30) | 264              | (19) | 108            | (18) | 12 106              | (31) |
| 35–44                                   | 552              | (22) | 145            | (25) | 5 135               | (24) | 465              | (24) | 137            | (23) | 5 841               | (24) | 319              | (23) | 132            | (22) | 9 467               | (24) |
| 45–54                                   | 638              | (26) | 186            | (31) | 5 673               | (26) | 521              | (26) | 190            | (32) | 6 532               | (27) | 413              | (30) | 188            | (32) | 10 139              | (26) |
| 55–68                                   | 574              | (23) | 131            | (22) | 4 153               | (19) | 499              | (25) | 144            | (25) | 4 731               | (19) | 395              | (28) | 164            | (28) | 7 546               | (19) |
| <b>Absences</b>                         |                  |      |                |      |                     |      |                  |      |                |      |                     |      |                  |      |                |      |                     |      |
| Sickness absence certified by physician | 2 219            | (90) | 551            | (93) | 10 309              | (47) | 1 511            | (76) | 556            | (94) | 11 642              | (47) | 978              | (70) | 547            | (92) | 18 350              | (47) |
| 0 days /year                            | 207              | (8)  | 33             | (6)  | 9 554               | (44) | 377              | (19) | 26             | (4)  | 10 374              | (42) | 315              | (23) | 34             | (6)  | 16 873              | (43) |
| 1–15 days /year                         | 768              | (31) | 147            | (25) | 10 026              | (46) | 873              | (44) | 127            | (22) | 11 722              | (48) | 653              | (47) | 150            | (25) | 18 906              | (48) |
| >15 days /year                          | 1493             | (61) | 412            | (69) | 2 132               | (10) | 739              | (37) | 439            | (74) | 2 442               | (10) | 423              | (30) | 408            | (69) | 3 479               | (9)  |

Statistically significant results with Chi square -tests,  $p < 0.001$

FA status was defined as the top decile of attenders (frequent attender 10%, FA10)

1yFA = Patients that were in the top decile of attenders in 2014

pFA = Patients that were in the top decile in all three study years (2014, 2015 and 2016)

non-FA = Patients that were never in the top decile were considered as a reference group, non-frequent attenders

1  
2  
3 As a whole the pFA group had a median of 16 absence episodes during the three study years, the 1yFA group had 7  
4 episodes and the non-FA group had a median of 2 episodes, all certified by a physician (table 2). The pFA group had a  
5 constant median 5 to 6 sickness absence episodes yearly whereas the 1yFA group had a median of 4 sickness absence  
6 episodes in 2014, after which the frequency of episodes diminished. However, the frequency of sickness episodes  
7 remained higher among the 1yFA group than in the non-FA group two years after the 1yFA group's frequent attendance  
8 ended.  
9  
10  
11  
12  
13  
14  
15

16 The lengths of sickness absence episodes are shown in table 2. The average length of a sickness absence episode is  
17 consistently high for the pFA group. It is equally high for 1yFA in the first study year, their year of frequent attendance, but  
18 the mean and median length of sickness absence reduces slowly, while remaining higher through the study years  
19 compared with the non-FA group. The median lengths of single absence episodes are equal between the groups. The  
20 median length of single sickness absence episode due to mental and behavioural disorders (F00–F99) was 9, 7 and 7 days  
21 for 1yFA, pFA and non-FA respectively. The median lengths for musculoskeletal disorders (M00–M99) among 1yFA, pFA  
22 and non-FA were 7, 5 and 5 days respectively (data not shown).  
23  
24  
25  
26  
27  
28  
29  
30  
31  
32  
33  
34  
35  
36  
37  
38  
39  
40  
41  
42  
43  
44  
45  
46  
47  
48  
49  
50  
51  
52  
53  
54  
55  
56  
57  
58  
59  
60



Table 2. Median and average lengths of sickness absence episodes, median and average number of absence days yearly and median and average number of written sickness absence certificates yearly (2014–2016) by frequent attender status, n = 33 592 (patients with a sickness absence certified by a physician)

|                                    | Total length of sickness absences per year |    | Average length of a single sickness absence episode |    | Number of written sickness absence certificates |    |
|------------------------------------|--------------------------------------------|----|-----------------------------------------------------|----|-------------------------------------------------|----|
|                                    | av.                                        | md | av.                                                 | md | av.                                             | md |
| <b>2014</b><br>(n = 23 232)        | ***                                        |    | ***                                                 |    | ***                                             |    |
| 1yFA                               | 46.1                                       | 23 | 9.2                                                 | 4  | 5.0                                             | 4  |
| pFA                                | 42.6                                       | 25 | 7.1                                                 | 4  | 6.0                                             | 5  |
| non-FA                             | 14.4                                       | 6  | 7.7                                                 | 3  | 1.9                                             | 1  |
| <b>2015</b><br>(n = 25 151)        | ***                                        |    | ***                                                 |    | ***                                             |    |
| 1yFA                               | 41.2                                       | 14 | 11.7                                                | 4  | 3.5                                             | 3  |
| pFA                                | 51.4                                       | 29 | 8.0                                                 | 4  | 6.4                                             | 6  |
| non-FA                             | 14.0                                       | 5  | 7.5                                                 | 3  | 1.9                                             | 1  |
| <b>2016</b><br>(n = 38 054)        | ***                                        |    | ***                                                 |    | ***                                             |    |
| 1yFA                               | 28.0                                       | 10 | 9.1                                                 | 4  | 3.1                                             | 2  |
| pFA                                | 51.6                                       | 24 | 8.8                                                 | 4  | 5.9                                             | 5  |
| non-FA                             | 12.5                                       | 5  | 6.9                                                 | 3  | 1.8                                             | 1  |
| <b>2014 – 2016</b><br>(n = 56 042) | ***                                        |    | ***                                                 |    | ***                                             |    |
| 1yFA                               | 82.5                                       | 41 | 9.8                                                 | 4  | 8.4                                             | 7  |
| pFA                                | 138.4                                      | 96 | 7.9                                                 | 4  | 17.4                                            | 16 |
| non-FA                             | 17.7                                       | 7  | 7.3                                                 | 3  | 2.4                                             | 2  |

Kruskal-Wallis Test, \*\*\* =  $p < 0.001$ , av. = average, md = median

FA status was defined as the top decile of attenders (frequent attender 10%, FA10)

1yFA = Patients that were in the top decile of attenders in 2014

pFA = Patients that were in the top decile in all three study years (2014, 2015 and 2016)

non-FA = Patients that were never in the top decile were considered as a reference group, non-frequent attenders

1  
2  
3 Throughout the study years long sickness absences (15 or more days yearly) were mostly due to musculoskeletal disorders  
4 (table 3). Injuries were the second largest diagnostic group for non-FA causing long absences while for 1yFA and pFA long  
5 absences were caused by mental and behavioural disorders. Musculoskeletal and mental disorders caused 64% of long  
6 sick-leave episodes for 1yFA and 63% for pFA, while for the non-FA group the proportion was 46%.  
7  
8  
9  
10  
11  
12  
13  
14  
15  
16  
17  
18  
19  
20  
21  
22  
23  
24  
25  
26  
27  
28  
29  
30  
31  
32  
33  
34  
35  
36  
37  
38  
39  
40  
41  
42  
43  
44  
45  
46  
47  
48  
49  
50  
51  
52  
53  
54  
55  
56  
57  
58  
59  
60

For peer review only

Table 3. Diagnostic codes associated with sickness absences of different lengths (for sickness absence certificates given by a physician), 2014 – 2016, n = number of sickness absence certificates

| ICD-10                                                                      | 1yFA, n = 19 506      |      |                        |      |                                 |      | pFA, n = 10 117       |      |                        |      |                                 |      | non-FA, n = 74 176      |      |                          |      |                                 |      |
|-----------------------------------------------------------------------------|-----------------------|------|------------------------|------|---------------------------------|------|-----------------------|------|------------------------|------|---------------------------------|------|-------------------------|------|--------------------------|------|---------------------------------|------|
|                                                                             | 1-3 days,<br>n = 8597 |      | 4-14 days,<br>n = 8261 |      | 15 or more<br>days,<br>n = 2648 |      | 1-3 days,<br>n = 4732 |      | 4-14 days,<br>n = 4357 |      | 15 or more<br>days,<br>n = 1028 |      | 1-3 days,<br>n = 39 566 |      | 4-14 days,<br>n = 28 243 |      | 15 or more<br>days,<br>n = 6367 |      |
|                                                                             | n                     | (%)  | n                      | (%)  | n                               | (%)  | n                     | (%)  | n                      | (%)  | n                               | (%)  | n                       | (%)  | n                        | (%)  | n                               | (%)  |
| J00-J99 Diseases of the respiratory system                                  | 4020                  | (47) | 1367                   | (17) | 48                              | (2)  | 2150                  | (45) | 810                    | (17) | 19                              | (2)  | 20 856                  | (53) | 6570                     | (23) | 118                             | (2)  |
| M00-M99 Diseases of the musculoskeletal system and connective               | 1545                  | (18) | 3678                   | (45) | 1248                            | (47) | 1028                  | (22) | 2042                   | (47) | 483                             | (47) | 5585                    | (14) | 9820                     | (35) | 1982                            | (31) |
| S00-T98 Injury, poisoning and certain other consequences of external causes | 463                   | (5)  | 1045                   | (13) | 366                             | (14) | 221                   | (5)  | 461                    | (11) | 136                             | (13) | 2100                    | (5)  | 4640                     | (16) | 1471                            | (23) |
| F00-F99 Mental and behavioural disorders                                    | 281                   | (3)  | 809                    | (10) | 439                             | (17) | 165                   | (4)  | 353                    | (8)  | 164                             | (16) | 829                     | (2)  | 2171                     | (8)  | 948                             | (15) |
| A00-B99 Certain infectious and parasitic diseases                           | 603                   | (7)  | 145                    | (2)  | 4                               | (0)  | 255                   | (5)  | 52                     | (1)  | 4                               | (0)  | 2749                    | (7)  | 792                      | (3)  | 35                              | (1)  |
| Others                                                                      | 1685                  | (20) | 1217                   | (15) | 543                             | (21) | 913                   | (19) | 639                    | (15) | 222                             | (22) | 7447                    | (19) | 42 500                   | (15) | 1813                            | (28) |

FA status was defined as the top decile of attenders (frequent attender 10%, FA10)

1yFA = Patients that were in the top decile of attenders in 2014

pFA = Patients that were in the top decile in all three study years (2014, 2015 and 2016)

non-FA = Patients that were never in the top decile were considered as a reference group, non-frequent attenders

In the table are presented the five largest diagnostic groups that had the most sickness absence certificates written through the study years, arranged according to the number of certificates in each category

1  
2  
3 In the fully adjusted multinomial logistic regression model there was no significant difference between short absences  
4 between the groups (table 4). In the first year, pFA and 1yFA did not differ significantly in their risk of any length sickness  
5 absence. However, in the following years pFA had higher odds (OR 3.73, 95% CI 2.49–5.60 in 2016) of a long sickness  
6 absence than 1yFA. These groups did not differ in their risk for intermediate length absences. Throughout the study years  
7 both 1yFA (OR 1.44, 95% CI 1.23–1.69 in 2016) and pFA (OR 2.08, 95% CI 1.39–3.10 in 2016) had higher risk for  
8 intermediate length absences than non-FA. This association was enhanced when studying long absences. In 2016 1yFA had  
9 higher odds (OR 2.95, 95% CI 2.50–3.49) for having a 15 or more days' absence than non-FA, as did pFA (OR 11.0, 95% CI  
10 7.54–16.06).  
11  
12  
13  
14  
15  
16  
17  
18  
19  
20  
21  
22  
23  
24  
25  
26  
27  
28  
29  
30  
31  
32  
33  
34  
35  
36  
37  
38  
39  
40  
41  
42  
43  
44  
45  
46  
47  
48  
49  
50  
51  
52  
53  
54  
55  
56  
57  
58  
59  
60

Table 4. Lengths of sickness absences associated with frequent attender status in multinomial logistic regression (adjusted for sex, age, field of industry, cancer dg (C00-C97) and number of different ICD10-diagnoses given by physicians), n = 24 772 – 41 241

|                                 | 1yFA vs. non-FA |               | pFA vs. non-FA |               | pFA vs. 1yFA |             |
|---------------------------------|-----------------|---------------|----------------|---------------|--------------|-------------|
|                                 | OR              | 95 % CI       | OR             | 95 % CI       | OR           | 95 % CI     |
| <b>Sickness absences (2014)</b> |                 |               |                |               |              |             |
| no sickness absence (0 days)    | 1.0             |               | 1.0            |               | 1.0          |             |
| short (1-3 days)                | 1.15            | 0.91 - 1.45   | 1.06           | 0.61 - 1.85   | 0.93         | 0.52 - 1.67 |
| intermediate length (4-14 days) | 2.34            | 1.96 - 2.80   | 2.33           | 1.55 - 3.51   | 1.00         | 0.65 - 1.53 |
| long (15 or more days)          | 13.10           | 11.07 - 15.50 | 18.27          | 12.54 - 26.60 | 1.39         | 0.94 - 2.07 |
| <b>Sickness absences (2015)</b> |                 |               |                |               |              |             |
| no sickness absence (0 days)    | 1.0             |               | 1.0            |               | 1.0          |             |
| short (1-3 days)                | 1.20            | 1.01 - 1.42   | 1.32           | 0.72 - 2.40   | 1.09         | 0.59 - 2.04 |
| intermediate length (4-14 days) | 1.89            | 1.64 - 2.17   | 2.92           | 1.87 - 4.57   | 1.55         | 0.97 - 2.46 |
| long (15 or more days)          | 4.48            | 3.88 - 5.16   | 17.96          | 11.83 - 27.25 | 4.01         | 2.60 - 6.18 |
| <b>Sickness absences (2016)</b> |                 |               |                |               |              |             |
| no sickness absence (0 days)    | 1.0             |               | 1.0            |               | 1.0          |             |
| short (1-3 days)                | 1.08            | 0.89 - 1.29   | 0.93           | 0.54 - 1.59   | 0.86         | 0.49 - 1.52 |
| intermediate length (4-14 days) | 1.44            | 1.23 - 1.69   | 2.08           | 1.39 - 3.10   | 1.44         | 0.94 - 2.20 |
| long (15 or more days)          | 2.95            | 2.50 - 3.49   | 11.00          | 7.54 - 16.06  | 3.73         | 2.49 - 5.60 |

OR = Odds ratio, CI = Confidence interval, 1.0 = reference group, p < 0.001 in all values

FA status was defined as the top decile of attenders (frequent attender 10%, FA10)

1yFA = Patients that were in the top decile of attenders in 2014

pFA = Patients that were in the top decile in all three study years (2014, 2015 and 2016)

non-FA = Patients that were never in the top decile were considered as a reference group, non-frequent attenders

## DISCUSSION

Our results indicate that persistent frequent attenders have more and longer sickness absence episodes than other users of OH primary care. However, occasional frequent attenders also have more and longer sickness absences than non-frequent attenders, not only in their year of frequent attendance, but also in the following two years. Both frequent attender groups are also associated with increased risk of long sickness absences. These findings are novel and allow for better understanding of the risk for work disability associated with frequent attendance.

In a Finnish study on municipal employees sickness absence longer than 15 days was highly predictive of future disability pension and a Danish study showed that the longer the absence the higher the risk for disability pension in private sector employees. [27,32] In our study approximately 70% of persistent frequent attenders had a sickness absence >15 days yearly while for non-frequent attenders the proportion was a maximum of 10% through the study years. In 2014 almost two thirds of occasional frequent attenders had >15 days sickness absence and after two years follow up one third of occasional FA had >15 days of absence. Our results indicate that both persistent and occasional FA have more and longer sickness absences than an average user and thus might be at an increased risk of retirement due to disability.

Most long sickness absences were caused by diseases of the musculoskeletal system in all groups, but the proportions were higher for occasional and persistent FA than non-FA. The second largest group causing long absences was mental disorders for both occasional and persistent FA. Previous research indicates that musculoskeletal and mental disorders in particular cause recurrent sickness absences and that consultations for a specific illness tend to predict future consultations for the same illness group. [33,34] Detection of these individuals for follow up and necessary rehabilitative measures is important to maintain work ability. Additionally, in particular sick-leaves based on psychiatric and musculoskeletal reasons show increased risk in future for illness based retirement.[35,36] As our study shows that these diagnostic groups are associated with sickness absences of both occasional and persistent frequent attenders, both groups should be of special interest in OHS and GP setting treating working age patients.

Sickness absences predict future disability and retirement due to ill-health and these individuals should be identified for rehabilitation. This study indicates that both persistent and occasional frequent attenders are at risk of long sickness absences that in turn are associated with risk of disability pension. Vast use of services could be used as an early indicator

1  
2  
3 for interventions to protect work ability. Also, as frequent attendance is mostly a self-limiting-condition it has been argued  
4 whether occasional frequent attenders should be a target group for interventions at all.[37] However, our results indicate  
5 that occasional frequent attenders' sickness absences are higher than average users' even after the consultation rates  
6 have reduced indicating that they are also in need of rehabilitative evaluation bearing in mind work ability. In addition to  
7 occasional frequent attenders' risk of future absences, also persistent frequent attenders need attention. Persistent  
8 frequent attenders appear to be a group of patients whose needs have not been met. Both these patient groups should be  
9 identified and careful diagnostic evaluation should be conducted to enable meeting their needs and reducing absences.  
10  
11 So far effective interventions on frequent attenders have been those based on in depth analysis of patient's reasons for  
12 attendance and accordingly selected actions.[38] The measured outcomes have been mostly consultation frequency or  
13 morbidity, but in the future, sickness absences and change in their frequency or length could be measured as well. Early  
14 detection of individuals at risk of work disability based on readily available markers is crucial for the implementation of  
15 timely interventions and rehabilitative measures to sustain patient's work ability.[36] Work ability/disability and work  
16 relatedness could be also worth considering when discussing frequent attenders. Determining how sickness absences are  
17 associated with frequent attendance is important due to the cost of absenteeism on employers and society but also  
18 because of the effects on the individual – medically certified sickness absences are also associated with mortality.[39,40]  
19  
20  
21  
22  
23  
24  
25  
26  
27  
28  
29  
30  
31  
32  
33  
34

### 35 **Strengths and limitations**

36  
37  
38 The strengths of this study are the large study population from an OHS provider including wide range of industries and  
39 company sizes from both rural and urban areas. The employees are representative of the working population in Finland  
40 including all ages, employment lengths and status, which allows generalization outside this particular service provider. The  
41 results can be generalized to OHS sector in Finland where variety of industries are present, and cautious interpretations  
42 can be made concerning the working population in general. As no sampling was done, there should not be selection bias in  
43 the frequent attender groups. Also, the use of medical records to define frequency of visits removes inaccuracy related to  
44 self-reported utilization.[41] The novel longitudinal study design employed in this study allows for examining sickness  
45 absences also after frequent attendance, which gives unique information on risks associated with frequent attendance.  
46  
47 Although there might be limitations to primary care services in OH, visits to nurses and physicians are not restricted.  
48  
49  
50  
51  
52  
53  
54  
55  
56  
57  
58  
59  
60

1  
2  
3 However, this study is limited by lack of information on occupational status and education since they are not available  
4 from medical records. In addition, loss to follow up in OHS may be larger than in the GP setting since patients can be lost  
5 due to an employment relationship that ends. We did not have access to medical record data of other service providers,  
6 thus the sample might include individuals that use other service sectors widely and this could not be accounted for.  
7  
8 However, there is evidence that when OH primary care is available, it is often used as the sole primary care provider.[15]  
9  
10 Also, we cannot track the service use of the patients lost for follow-up. This might add inaccuracy to categorization of  
11 different frequent attender groups. However, we conducted confirmatory analyses on the subgroup of 1391 occasional  
12 FAs whose service use was known for the entire study time, and the results did not differ substantially. We have  
13 conducted also confirmatory analyses to ensure that we have sufficient data also on 1–3 days' length sick-leaves. All sick-  
14 leave certificates of one of the largest employers on the Pihlajalinn client lists are entered onto the Pihlajalinn sick-leave  
15 register. When comparing the proportions of different length absence episodes between this employer and all the data  
16 the results did not differ to a great degree. We defined frequent attenders according to attendance rates across the study  
17 population since we wanted to study the working population as a whole. Our study population includes only the working,  
18 which narrows the differences between different age groups.  
19  
20  
21  
22  
23  
24  
25  
26  
27  
28  
29  
30

## 31 32 **CONCLUSIONS**

33 Both occasional and persistent frequent attenders have higher odds for long and intermediate length absences, which  
34 suggests an elevated risk of future retirement due to disability. Frequent attenders should be identified in the working age  
35 population and sickness absences should be taken into account when planning frequent attender rehabilitation and  
36 interventions.  
37  
38  
39  
40  
41  
42

43 In future, a longer follow-up of sickness absences would be useful to see whether sickness absence rate eventually  
44 equalizes with the non-FA group. More understanding is needed of how frequent attendance is associated with disability  
45 and retirement due to ill-health.  
46  
47  
48  
49  
50  
51  
52  
53  
54  
55  
56  
57  
58  
59  
60



## FUNDING

This study is part of the “Effectiveness and Indicators of Occupational Health Services” supported by the European Social Fund [reference number S20659].

## COMPETING INTERESTS

The Authors declare that there is no conflict of interest.

## ACKNOWLEDGEMENTS

The authors acknowledge the participation of the occupational health staff in the study and all the individual clients who are part of this study.

## AUTHOR’S CONTRIBUTIONS

JU conceptualized the study. TR, SA, NT, MS, MV and JU planned the analysis and NT analyzed the data. TR wrote the first draft, all authors commented on the draft and approved the final version.

## AVAILABILITY OF DATA AND MATERIAL

The data that support the findings of this study are available from Pihlajalinna Työterveys but restrictions apply to the availability of these data, which were used under license for the current study, and so are not publicly available. Data are however available from the authors upon reasonable request and with permission of Pihlajalinna Työterveys.

## REFERENCES

- 1 Gill D, Dawes M, Sharpe M, *et al.* GP frequent consulters: Their prevalence, natural history, and contribution to rising workload. *Br J Gen Pract* 1998;**48**:1856–7.
- 2 Smits FT, Brouwer HJ, ter Riet G, *et al.* Epidemiology of frequent attenders: a 3-year historic cohort study comparing attendance, morbidity and prescriptions of one-year and persistent frequent attenders. *BMC Public Health* 2009;**9**. doi:10.1186/1471-2458-9-36
- 3 Patel S, Kai J, Atha C, *et al.* Clinical characteristics of persistent frequent attenders in primary care: Case-control study. *Fam Pract* 2015;**32**:624–30. doi:10.1093/fampra/cmz076
- 4 Droomers M, Westert GP. Do lower socioeconomic groups use more health services, because they suffer from more illnesses? *Eur J Public Health* 2004;**14**:311–3.
- 5 Bergh H, Baigi A, Marklund B. Consultations for injuries by frequent attenders are found to be medically appropriate from general practitioners' perspective. *Scand J Public Health* 2005;**33**:228–32. doi:10.1080/14034940510005761
- 6 Pymont C, Butterworth P. Longitudinal cohort study describing persistent frequent attenders in Australian primary healthcare. *BMJ Open* 2015;**5**:e008975. doi:10.1136/bmjopen-2015-008975
- 7 Smits FT, Brouwer HJ, Zwinderman AH, *et al.* Why do they keep coming back? Psychosocial etiology of persistence of frequent attendance in primary care: A prospective cohort study. *J Psychosom Res* 2014;**77**:492–503. doi:10.1016/j.jpsychores.2014.08.003
- 8 Vedsted P, Christensen MB. Frequent attenders in general practice care: A literature review with special reference to methodological considerations. *Public Health* 2005;**119**:118–37. doi:10.1016/j.puhe.2004.03.007
- 9 Scaife B, Gill P, Heywood P, *et al.* Socio-economic characteristics of adult frequent attenders in general practice: secondary analysis of data. *Fam Pract* 2000;**17**:298–304. doi:10.1093/fampra/17.4.298
- 10 Al-Windi A, Elmfeldt D, Svärdsudd K. The influence of sociodemographic characteristics on health care utilisation in a Swedish municipality. *Ups J Med Sci* 2004;**109**:33–42. doi:10.3109/2000-1967-108

- 1  
2  
3 11 Karlsson H, Lehtinen V, Joukamaa M. Frequent Attenders of Finnish Public Primary Health-Care -  
4 Sociodemographic Characteristics and Physical Morbidity. *Fam Pract* 1994;**11**:424–30.  
5  
6 doi:10.1093/fampra/11.4.424  
7  
8  
9  
10 12 Bergh H, Baigi A, Månsson J, *et al.* Predictive factors for long-term sick leave and disability pension among frequent  
11 and normal attenders in primary health care over 5 years. *Public Health* 2007;**121**:25–33.  
12  
13 doi:10.1016/j.puhe.2006.08.018  
14  
15  
16 13 Jyväsjärvi S, Keinänen-Kiukaanniemi S, Väisänen E, *et al.* Frequent attenders in a Finnish health centre: morbidity  
17 and reasons for encounter. *Scand J Prim Health Care* 1998;**16**:141–8. doi:10.1080/028134398750003089  
18  
19  
20  
21 14 Luciano J V, Fernández A, Pinto-Meza A, *et al.* Frequent attendance in primary care: comparison and implications  
22 of different definitions. *Br J Gen Pract* 2010;**60**:e49-55. doi:10.3399/bjgp10X483139  
23  
24  
25  
26 15 Ikonen A, Räsänen K, Manninen P, *et al.* Use of health services by Finnish employees in regard to health-related  
27 factors: The population-based Health 2000 study. *Int Arch Occup Environ Health* 2013;**86**:451–62.  
28  
29  
30  
31 doi:10.1007/s00420-012-0778-0  
32  
33 16 Lappalainen K, Aminoff M, Hakulinen H, *et al.* *Työterveyshuolto Suomessa vuonna 2015 [Occupational healthcare*  
34 *in Finland 2015 Report] (In Finnish with english summary).* Työterveyslaitos 2016.  
35  
36  
37 17 Laaksonen M, Rantala J, Järnefelt N, *et al.* Työkyvyttömyyden vuoksi menetetty työura. [*Loss of working career due*  
38 *to illness based retirement] (In Finnish with english summary).* Eläketurvakeskus 2016.  
39  
40  
41  
42 18 Henderson M, Glozier N, Elliot KH. Editorials: Long term sickness absence. *BMJ Br Med J* 2005;**330**:802–3.  
43  
44  
45  
46 doi:10.1136/bmj.330.7499.1087-a  
47  
48  
49 19 Pekkala J, Blomgren J, Pietiläinen O, *et al.* Occupational class differences in diagnostic-specific sickness absence: a  
50 register-based study in the Finnish population. *BMC Public Health* 2017;**17**. doi:10.1186/s12889-017-4674-0  
51  
52 20 Bergh H, Marklund B. Characteristics of frequent attenders in different age and sex groups in primary health care.  
53  
54  
55  
56  
57  
58  
59  
60

- 1  
2  
3 21 Karlsson H, Lehtinen V, Joukamaa M. Psychiatric morbidity among frequent attender patients in primary care. *Gen*  
4  
5 *Hosp Psychiatry* 1995;**17**:19–25. doi:10.1016/0163-8343(94)00059-M  
6  
7  
8 22 Reho T, Atkins S, Talola N, *et al.* Frequent attenders in occupational health primary care – a cross-sectional study.  
9  
10 *Scand J Public Health* Published Online First 27 May 2018. doi:10.1177/1403494818777436  
11  
12 23 Kimanen A, Rautio M, Manninen P, *et al.* Primary care visits to occupational health physicians and nurses in  
13  
14 Finland. *Scand J Public Health* 2011;**39**:525–32. doi:10.1177/1403494811399651  
15  
16  
17 24 Ikonen A, Räsänen K, Manninen P, *et al.* Work-Related Primary Care in Occupational Health Physician’s Practice. *J*  
18  
19 *Occup Rehabil* 2012;**22**:88–96. doi:10.1007/s10926-011-9325-1  
20  
21  
22 25 Hultin H, Lindholm C, Möller J, *et al.* Is There an Association between Long-Term Sick Leave and Disability Pension  
23  
24 and Unemployment beyond the Effect of Health Status? – A Cohort Study. *PLoS One* 2012;**7**:e35614.  
25  
26 doi:10.1371/journal.pone.0035614  
27  
28  
29 26 Hultin H, Lindholm C, Malfert M, *et al.* Short-term sick leave and future risk of sickness absence and  
30  
31 unemployment - the impact of health status. *BMC Public Health* 2012;**12**:861. doi:10.1186/1471-2458-12-861  
32  
33  
34 27 Lund T, Kivimäki M, Labriola M, *et al.* Using administrative sickness absence data as a marker of future disability  
35  
36 pension: The prospective DREAM study of Danish private sector employees. *Occup Environ Med* 2008;**65**:28–31.  
37  
38 doi:10.1136/oem.2006.031393  
39  
40  
41 28 Van Oostrom S, Driessen M, de Vet H, *et al.* Workplace interventions for preventing work disability (Review).  
42  
43 *Cochrane Database Syst Rev* 2009;:1–67.  
44  
45  
46 29 Taimela S, Justen S, Aronen P, *et al.* An occupational health intervention programme for workers at high risk for  
47  
48 sickness absence. Cost effectiveness analysis based on a randomised controlled trial. *Occup Env Med* 2008;**65**:242–  
49  
50 8.  
51  
52 30 Kant I, Jansen NWH, van Amelsvoort LGPM, *et al.* Structured early consultation with the occupational physician  
53  
54 reduces sickness absence among office workers at high risk for long-term sickness absence: A randomized  
55  
56 controlled trial. *J Occup Rehabil* 2008;**18**:79–86. doi:10.1007/s10926-007-9114-z  
57  
58  
59  
60

- 1  
2  
3 31 Laaksonen M, He L, Pitkääniemi J. The durations of past sickness absences predict future absence episodes. *J Occup*  
4  
5 *Environ Med* 2013;**55**:87–92. doi:10.1097/JOM.0b013e318270d724  
6  
7  
8 32 Kivimäki M, Forma P, Wikström J, *et al.* Sickness absence as a risk marker of future disability pension: the 10-town  
9  
10 study. *J Epidemiol Community Heal* 2004;**58**:710–1. doi:10.1136/jech.2003.015842  
11  
12  
13 33 Roelen C, Koopmans P, Anema J, *et al.* Recurrence of Medically Certified Sickness Absence According to Diagnosis:  
14  
15 A Sickness Absence Register Study. *J occupational Rehabil* 2010;**20**:113–21. doi:10.1007/s10926-009-9226-8  
16  
17  
18 34 Jordan K, Ong BN, Croft P. Previous consultation and self reported health status as predictors of future demand for  
19  
20 primary care. *J Epidemiol Community Heal* 2003;**57**:109–13.  
21  
22  
23 35 Kivimäki M, Ferrie JE, Hagberg J, *et al.* Diagnosis-specific sick leave as a risk marker for disability pension in a  
24  
25 Swedish population. *J Epidemiol Community Heal* 2007;**61**:915–20. doi:10.1136/jech.2006.055426  
26  
27  
28 36 Alexanderson K, Kivimäki M, Ferrie JE, *et al.* Diagnosis-specific sick leave as a long-term predictor of disability  
29  
30 pension: A 13-year follow-up of the GAZEL cohort study. *J Epidemiol Community Heal* 2012;**66**:155–9.  
31  
32 doi:10.1136/jech.2010.126789  
33  
34  
35 37 Smits FTM, Brouwer HJ, van Weert HCP, *et al.* Predictability of persistent frequent attendance: A historic 3-year  
36  
37 cohort study. *Br J Gen Pract* 2009;**59**:114–9. doi:10.3399/bjgp09X395120  
38  
39  
40 38 Haroun D, Smits F, van Etten-Jamaludin F, *et al.* The effects of interventions on quality of life, morbidity and  
41  
42 consultation frequency in frequent attenders in primary care: A systematic review. *Eur J Gen Pract* 2016;**22**:71–82.  
43  
44 doi:10.3109/13814788.2016.1161751  
45  
46  
47 39 Kivimäki M, Head J, Ferrie JE, *et al.* Sickness absence as a global measure of health: evidence from mortality in the  
48  
49 Whitehall II prospective cohort study. *BMJ* 2003;**327**. doi:10.1136/bmj.327.7411.364  
50  
51  
52 40 Anema JR, van der Beek AJ. Medically certified sickness absence. *BMJ* 2008;**337**:a1174. doi:10.1136/BMJ.A1174  
53  
54  
55 41 Bellón JÁ, Lardelli P, De J, *et al.* Validity of self reported utilisation of primary health care services in an urban  
56  
57 population in Spain. *J Epidemiol Community Heal* 2000;**54**:544–51.  
58  
59  
60

1  
2  
3  
4  
5  
6  
7  
8  
9  
10  
11  
12  
13  
14  
15  
16  
17  
18  
19  
20  
21  
22  
23  
24  
25  
26  
27  
28  
29  
30  
31  
32  
33  
34  
35  
36  
37  
38  
39  
40  
41  
42  
43  
44  
45  
46  
47  
48  
49  
50  
51  
52  
53  
54  
55  
56  
57  
58  
59  
60

**FIGURES**

Figure 1. Flow of the study population

For peer review only

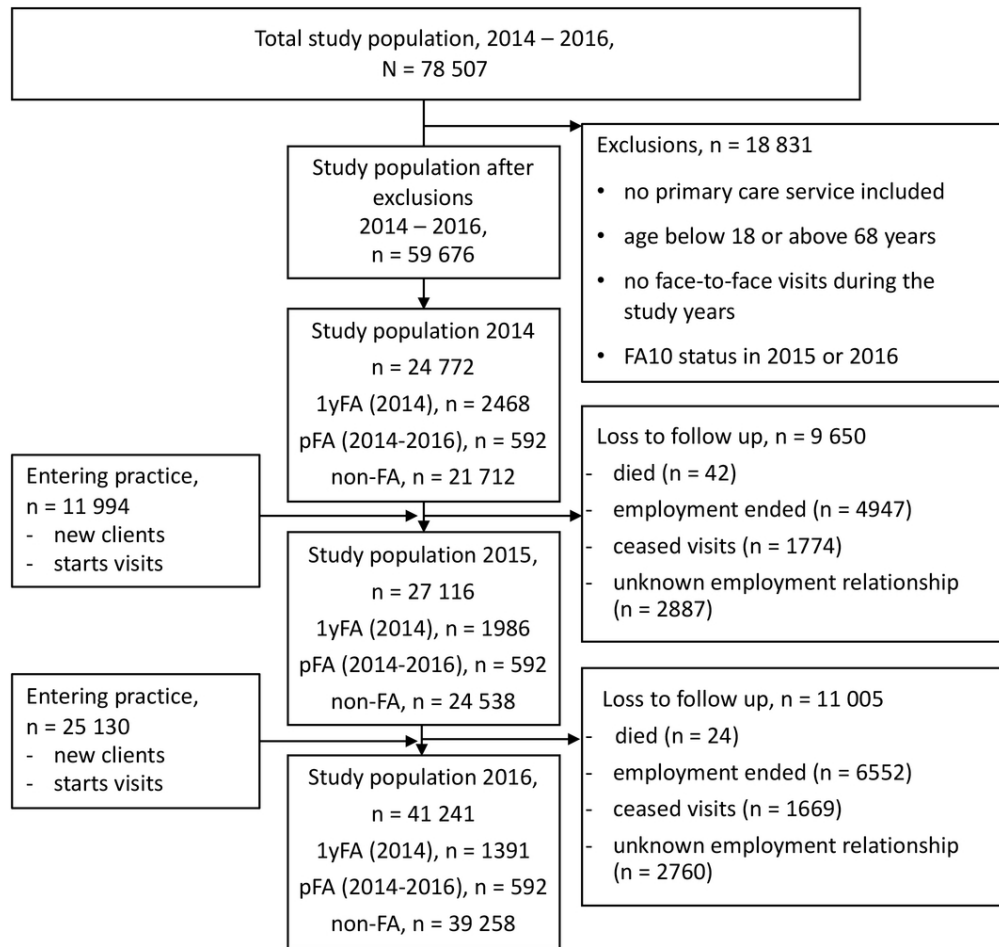

Figure 1. Flow of the study population  
 1yFA = Patients that were in the top decile of attenders in 2014  
 pFA = Patients that were in the top decile in all three study years (2014, 2015 and 2016)  
 non-FA = Patients that were never in the top decile were considered as a reference group, non-frequent attenders

90x90mm (300 x 300 DPI)

STROBE Statement—checklist of items that should be included in reports of observational studies

|                           | Item No. | Recommendation                                                                                                                                                                                                                                                                                                                                                                                                                                                         | Page No. |
|---------------------------|----------|------------------------------------------------------------------------------------------------------------------------------------------------------------------------------------------------------------------------------------------------------------------------------------------------------------------------------------------------------------------------------------------------------------------------------------------------------------------------|----------|
| <b>Title and abstract</b> | 1        | (a) Indicate the study’s design with a commonly used term in the title or the abstract                                                                                                                                                                                                                                                                                                                                                                                 | 2        |
|                           |          | (b) Provide in the abstract an informative and balanced summary of what was done and what was found                                                                                                                                                                                                                                                                                                                                                                    | 2        |
| <b>Introduction</b>       |          |                                                                                                                                                                                                                                                                                                                                                                                                                                                                        |          |
| Background/rationale      | 2        | Explain the scientific background and rationale for the investigation being reported                                                                                                                                                                                                                                                                                                                                                                                   | 3-4      |
| Objectives                | 3        | State specific objectives, including any prespecified hypotheses                                                                                                                                                                                                                                                                                                                                                                                                       | 4        |
| <b>Methods</b>            |          |                                                                                                                                                                                                                                                                                                                                                                                                                                                                        |          |
| Study design              | 4        | Present key elements of study design early in the paper                                                                                                                                                                                                                                                                                                                                                                                                                | 5        |
| Setting                   | 5        | Describe the setting, locations, and relevant dates, including periods of recruitment, exposure, follow-up, and data collection                                                                                                                                                                                                                                                                                                                                        | 5-6      |
| Participants              | 6        | (a) <i>Cohort study</i> —Give the eligibility criteria, and the sources and methods of selection of participants. Describe methods of follow-up<br><i>Case-control study</i> —Give the eligibility criteria, and the sources and methods of case ascertainment and control selection. Give the rationale for the choice of cases and controls<br><i>Cross-sectional study</i> —Give the eligibility criteria, and the sources and methods of selection of participants | 5-6      |
|                           |          | (b) <i>Cohort study</i> —For matched studies, give matching criteria and number of exposed and unexposed<br><i>Case-control study</i> —For matched studies, give matching criteria and the number of controls per case                                                                                                                                                                                                                                                 | 5-6      |
| Variables                 | 7        | Clearly define all outcomes, exposures, predictors, potential confounders, and effect modifiers. Give diagnostic criteria, if applicable                                                                                                                                                                                                                                                                                                                               | 6        |
| Data sources/ measurement | 8*       | For each variable of interest, give sources of data and details of methods of assessment (measurement). Describe comparability of assessment methods if there is more than one group                                                                                                                                                                                                                                                                                   | 5-6      |
| Bias                      | 9        | Describe any efforts to address potential sources of bias                                                                                                                                                                                                                                                                                                                                                                                                              | 5-6, 16  |
| Study size                | 10       | Explain how the study size was arrived at                                                                                                                                                                                                                                                                                                                                                                                                                              | 5        |

Continued on next page



|                        |     |                                                                                                                                                                                                                        |                |
|------------------------|-----|------------------------------------------------------------------------------------------------------------------------------------------------------------------------------------------------------------------------|----------------|
| Quantitative variables | 11  | Explain how quantitative variables were handled in the analyses. If applicable, describe which groupings were chosen and why                                                                                           | 5-6            |
| Statistical methods    | 12  | (a) Describe all statistical methods, including those used to control for confounding                                                                                                                                  | 6              |
|                        |     | (b) Describe any methods used to examine subgroups and interactions                                                                                                                                                    | 6              |
|                        |     | (c) Explain how missing data were addressed                                                                                                                                                                            | 16-17          |
|                        |     | (d) <i>Cohort study</i> —If applicable, explain how loss to follow-up was addressed                                                                                                                                    | 16-17          |
|                        |     | (e) <i>Case-control study</i> —If applicable, explain how matching of cases and controls was addressed<br><i>Cross-sectional study</i> —If applicable, describe analytical methods taking account of sampling strategy | 5, 16-17       |
| <b>Results</b>         |     |                                                                                                                                                                                                                        |                |
| Participants           | 13* | (a) Report numbers of individuals at each stage of study—eg numbers potentially eligible, examined for eligibility, confirmed eligible, included in the study, completing follow-up, and analysed                      | 5, 7, figure 1 |
|                        |     | (b) Give reasons for non-participation at each stage                                                                                                                                                                   | 5, 7, figure 1 |
|                        |     | (c) Consider use of a flow diagram                                                                                                                                                                                     | 7, figure 1    |
| Descriptive data       | 14* | (a) Give characteristics of study participants (eg demographic, clinical, social) and information on exposures and potential confounders                                                                               | 7-8, 12        |
|                        |     | (b) Indicate number of participants with missing data for each variable of interest                                                                                                                                    | 5              |
|                        |     | (c) <i>Cohort study</i> —Summarise follow-up time (eg, average and total amount)                                                                                                                                       | 7              |
| Outcome data           | 15* | <i>Cohort study</i> —Report numbers of outcome events or summary measures over time                                                                                                                                    | 7-9            |
|                        |     | <i>Case-control study</i> —Report numbers in each exposure category, or summary measures of exposure                                                                                                                   |                |
|                        |     | <i>Cross-sectional study</i> —Report numbers of outcome events or summary measures                                                                                                                                     |                |
| Main results           | 16  | (a) Give unadjusted estimates and, if applicable, confounder-adjusted estimates and their precision (eg, 95% confidence interval). Make clear which confounders were adjusted for and why they were included           | 13-14          |
|                        |     | (b) Report category boundaries when continuous variables were categorized                                                                                                                                              | 6              |
|                        |     | (c) If relevant, consider translating estimates of relative risk into absolute risk for a meaningful time period                                                                                                       | N/A            |

Continued on next page

|                          |    |                                                                                                                                                                            |       |
|--------------------------|----|----------------------------------------------------------------------------------------------------------------------------------------------------------------------------|-------|
| Other analyses           | 17 | Report other analyses done—eg analyses of subgroups and interactions, and sensitivity analyses                                                                             | 9-10  |
| <b>Discussion</b>        |    |                                                                                                                                                                            |       |
| Key results              | 18 | Summarise key results with reference to study objectives                                                                                                                   | 15    |
| Limitations              | 19 | Discuss limitations of the study, taking into account sources of potential bias or imprecision. Discuss both direction and magnitude of any potential bias                 | 16-17 |
| Interpretation           | 20 | Give a cautious overall interpretation of results considering objectives, limitations, multiplicity of analyses, results from similar studies, and other relevant evidence | 16-17 |
| Generalisability         | 21 | Discuss the generalisability (external validity) of the study results                                                                                                      | 17    |
| <b>Other information</b> |    |                                                                                                                                                                            |       |
| Funding                  | 22 | Give the source of funding and the role of the funders for the present study and, if applicable, for the original study on which the present article is based              | 17    |

\*Give information separately for cases and controls in case-control studies and, if applicable, for exposed and unexposed groups in cohort and cross-sectional studies.

**Note:** An Explanation and Elaboration article discusses each checklist item and gives methodological background and published examples of transparent reporting. The STROBE checklist is best used in conjunction with this article (freely available on the Web sites of PLoS Medicine at <http://www.plosmedicine.org/>, Annals of Internal Medicine at <http://www.annals.org/>, and Epidemiology at <http://www.epidem.com/>). Information on the STROBE Initiative is available at [www.strobe-statement.org](http://www.strobe-statement.org).

# BMJ Open

## Occasional and persistent frequent attenders and sickness absences in occupational health primary care – a longitudinal study in Finland

|                                 |                                                                                                                                                                                                                                                                                                                                                                                                                                                                                                                                                                                                                                                                                                 |
|---------------------------------|-------------------------------------------------------------------------------------------------------------------------------------------------------------------------------------------------------------------------------------------------------------------------------------------------------------------------------------------------------------------------------------------------------------------------------------------------------------------------------------------------------------------------------------------------------------------------------------------------------------------------------------------------------------------------------------------------|
| Journal:                        | <i>BMJ Open</i>                                                                                                                                                                                                                                                                                                                                                                                                                                                                                                                                                                                                                                                                                 |
| Manuscript ID                   | bmjopen-2018-024980.R2                                                                                                                                                                                                                                                                                                                                                                                                                                                                                                                                                                                                                                                                          |
| Article Type:                   | Research                                                                                                                                                                                                                                                                                                                                                                                                                                                                                                                                                                                                                                                                                        |
| Date Submitted by the Author:   | 29-Nov-2018                                                                                                                                                                                                                                                                                                                                                                                                                                                                                                                                                                                                                                                                                     |
| Complete List of Authors:       | Reho, Tiia; Tampereen yliopisto Laaketieteen yksikko, Faculty of Medicine and Life Sciences; Pihlajalinna, Työterveys<br>Atkins, Salla; Tampereen yliopisto Laaketieteen yksikko, New Social Research and Faculty of Social Sciences; Karolinska Institutet, Department of Public Health Sciences<br>Talola, Nina; Tampereen yliopisto Laaketieteen yksikko, Faculty of Medicine and Life Sciences<br>Sumanen, Markku; Tampereen yliopisto Laaketieteen yksikko, Faculty of Medicine and Life Sciences<br>Viljamaa, Mervi; Pihlajalinna, Työterveys<br>Uitti, Jukka; Tampereen yliopisto Laaketieteen yksikko, Faculty of Medicine and Life Sciences; Työterveyslaitos Tampereen aluetoimipiste |
| <b>Primary Subject Heading</b>: | Public health                                                                                                                                                                                                                                                                                                                                                                                                                                                                                                                                                                                                                                                                                   |
| Secondary Subject Heading:      | Occupational and environmental medicine                                                                                                                                                                                                                                                                                                                                                                                                                                                                                                                                                                                                                                                         |
| Keywords:                       | sickness absence, occupational health, PRIMARY CARE, longitudinal studies, PUBLIC HEALTH, health care utilisation                                                                                                                                                                                                                                                                                                                                                                                                                                                                                                                                                                               |
|                                 |                                                                                                                                                                                                                                                                                                                                                                                                                                                                                                                                                                                                                                                                                                 |

SCHOLARONE™  
Manuscripts

1  
2  
3  
4  
5  
6  
7  
8  
9  
10  
11  
12  
13  
14  
15  
16  
17  
18  
19  
20  
21  
22  
23  
24  
25  
26  
27  
28  
29  
30  
31  
32  
33  
34  
35  
36  
37  
38  
39  
40  
41  
42  
43  
44  
45  
46  
47  
48  
49  
50  
51  
52  
53  
54  
55  
56  
57  
58  
59  
60

Research article

Corresponding author

Tiia TM Reho

Tampere University, Faculty of Medicine and Health Technology

PB 100

FI-33014 UNIVERSITY OF TAMPERE

FINLAND

Email: [tiia.reho@gmail.com](mailto:tiia.reho@gmail.com)

+358504512123

## Occasional and persistent frequent attenders and sickness absences in occupational health primary care – a longitudinal study in Finland

Tiia TM Reho <sup>1,2</sup> MD

Salla A Atkins <sup>3,4</sup> PhD

Nina Talola <sup>1</sup> Msc

Markku PT Sumanen<sup>1</sup> MD, PhD

Mervi Viljamaa <sup>2</sup> MD, PhD

Jukka Uitti <sup>1,5,6</sup> MD, PhD

1 Tampere University, Faculty of Medicine and Health Technology, Tampere, Finland

2 Pihlajalinna Työterveys, Tampere, Finland

3 Tampere University, New Social Research and Faculty of Social Sciences, Tampere, Finland

4 Karolinska Institutet, Department of Public Health Sciences, Stockholm, Sweden

5 Finnish Institute of Occupational Health, Tampere, Finland

6 Clinic of Occupational Medicine, Tampere University Hospital, Tampere, Finland

*Key words:* sickness absence; occupational health; primary health care; longitudinal studies; public health; access to health care

## ABSTRACT

*Objectives* Frequent attenders create a substantial portion of primary care workload but little is known about frequent attenders' sickness absences. The aim of the study is to investigate how occasional and persistent frequent attendance is associated with sickness absences among the working population in occupational health (OH) primary care.

*Setting and participants* This is a longitudinal study using medical record data (2014–2016) from an OH care provider in Finland. In total, 59 676 patients were included and categorized into occasional and persistent frequent attenders (FA) or non-frequent attenders (non-FA). Sick-leave episodes and their lengths were collected along with associated diagnostic codes. Logistic regression was used to analyze associations between FA status and sick-leaves of different lengths (1-3, 4-14 and 15 or more days).

*Results* Both occasional and persistent FA had more and longer duration of sick-leave than non-FA through the study years. Persistent frequent attenders had consistently high absence rates. Occasional FA had elevated absence rates even two years after their frequent attendance period. Persistent FAs (OR=11 95% CI 7.54-16.06 in 2016) and occasional-FAs (OR=2.95 95% CI 2.50-3.49 in 2016) were associated with long (15 or more days) sickness absence when compared with non-FA. Both groups of FA's had an increased risk of long term sick-leave indicating a risk of disability pension.

*Conclusion* Both occasional and persistent frequent attenders should be identified in primary care units caring for working age patients. As frequent attendance is associated with long sickness absences and possibly disability pensions, rehabilitation should be directed at this group to prevent work disability.

## STRENGTHS AND LIMITATIONS OF THIS STUDY

- The study relies on large nationwide data including employees from rural and urban areas and public and private employers
- The longitudinal study design allows for examining sickness absences also after consultation rates reduce
- The use of medical records to define frequency of visits and sickness absences removes inaccuracy related to self-reporting

1  
2  
3  
4  
5  
6  
7  
8  
9  
10  
11  
12  
13  
14  
15  
16  
17  
18  
19  
20  
21  
22  
23  
24  
25  
26  
27  
28  
29  
30  
31  
32  
33  
34  
35  
36  
37  
38  
39  
40  
41  
42  
43  
44  
45  
46  
47  
48  
49  
50  
51  
52  
53  
54  
55  
56  
57  
58  
59  
60

- The study lacks information on occupational status, education and use of other service providers as these are not available from occupational health medical records
- Loss to follow up in OHS is larger than in the GP setting since patients can be lost due to an employment relationship that ends

For peer review only

## INTRODUCTION

Frequent attendance is a costly and burdensome phenomenon for healthcare providers, society and patients.

Patients, often referred to as frequent attenders (FA), visit healthcare units repeatedly and constitute a substantial portion of both physician's time and healthcare costs.[1,2] On the other hand, FAs appear to be a vulnerable group of patients that suffer from multimorbidity, medically unexplained symptoms and low quality of life.[3–5] For most patients frequent attendance is transient while a group of persistent FAs continue recurrent visits for extended periods of time.[2,6] Research indicates that persistent FAs often suffer from some combination of somatic, psychological and social problems and are prone to anxiety and worry more than transient FAs are.[3,6,7]

Frequent attenders in general practice (GP) are often unemployed or (disability)pensioners but to date there is little known about the relationship between frequent attendance and sickness absences among the working population. [8–11] The available research indicates that chronic disease and negative life events are predictive of long term sickness absence among one year FAs.[12] A Swedish study in GP setting showed that 19% of FA's versus 6% of non-FA's received a long term sickness absence or disability pension over 5 years' follow-up.[12] Also being on sick-leave or on disability pension increased the mean number of visits in GP setting and was associated with being a frequent attender.[10,13,14] However, there are no data available on how occasional and persistent FAs differ in terms of sick-leave and if frequent attendance is predictive of future sickness absences. Little is also known about the diagnostic groups associated with FAs' sickness absences and whether these patterns are similar for occasional and persistent frequent attenders. There is little research on working age patients alone, and most research concerning working age patients is conducted in GP setting. OH primary care in Finland is an ideal place to study working age patients solely as OHs primary care is available to 90% of the working population and often used as the sole primary care provider. [15,16]

In Finland the proportion of time spent on disability pension is increasingly due to mental disorders, in particular depression.[17] In turn, musculoskeletal and mental disorders are the most common causes for long term sickness absences.[18,19] Both diagnostic groups are also associated with frequent attendance in the Nordic countries in a GP setting and in occupational health (OH) primary care. [20–22] Research shows that chronic illnesses that diminish work ability and symptoms related to work are associated with visiting OH primary care.[23] In the same setting, in almost half of the visits caused by mental reasons and in one third of visits due to musculoskeletal reasons, a sickness absence certificate was given.[24] These associations suggest that FAs could be a potential risk group for sickness

1  
2  
3 absences and work disability. To grasp the full picture of frequent attendance and the impact on society and  
4  
5 individuals we need to know if and how sickness absenteeism is associated with high use of services.  
6  
7

8 Understanding the association of frequent attendance with sickness absenteeism is vital to enable healthcare  
9  
10 providers to use frequent attendance as an early marker for necessary rehabilitation. It has been shown that short  
11  
12 term sick-leaves are associated with long sickness absences and long sick-leaves in turn predict disability.[25–27] If  
13  
14 frequent attendance is predictive of future absences this could be used to trigger early supportive measures possibly  
15  
16 even before the next occurrence of sickness absence. We need to define whether both occasional and persistent FAs  
17  
18 are at equal risk of sickness absences to define appropriate groups for OH interventions where the aim is to prevent  
19  
20 sickness absences and disability. Workplace interventions and OH intervention programs on individuals at risk of  
21  
22 sickness absences indicate both cost effectiveness and reduction in sickness absence days.[28–30] However, current  
23  
24 interventions are often designed around sickness absences and do not take into account patterns of frequent use.  
25  
26 Interventions should be aimed at the group of FAs who are also at risk of long term sickness absences to ensure both  
27  
28 resource management and disability prevention.  
29  
30

31 We aim to determine how sickness absences of different lengths are associated with occasional and persistent  
32  
33 frequent attendance.  
34  
35  
36  
37  
38  
39  
40  
41  
42  
43  
44  
45  
46  
47  
48  
49  
50  
51  
52  
53  
54  
55  
56  
57  
58  
59  
60



## MATERIAL AND METHODS

### Study setting and design

In Finland, OH is an important primary care provider for the working population that functions in parallel with municipal and private primary care services. Occupational health services (OHS) are divided into obligatory preventive services and voluntary primary care services of which the latter is, however, well used and covers up to 90% of employees [16]. OHS primary care is paid by the employers for the most part and is free of charge for the employees. In the Finnish OH primary care, in addition to work-related issues and issues related to work ability, acute and chronic illnesses and typical primary care issues are treated. In primary care issues a patient can choose where to attend but three out four patients having visited OHS named their OHS unit as their main primary care provider [31]. OHS primary care is often used as the sole primary care provider for the working population.[15] The role of the OHS units in primary care has increased in the past years [32] and primary care is used to support the preventive functions of the OHS by identifying individuals at risk of lowered work ability from the primary care appointments. Most professionals in OHS are specialized in occupational health. Physiotherapists and psychologists can be consulted after a referral from a nurse or a physician.

This study is conducted using data from Pihlajalinna Työterveys – a large nationwide private OHS provider. The clientele of Pihlajalinna includes employees from both municipal and private employers, with representation from different company sizes and industries. The study is a longitudinal register study using electronic medical record data of Pihlajalinna covering years 2014–2016.

### Data collection

Data used for the study included all visits to healthcare professionals and diagnostic codes (International Classification of Diseases, 10<sup>th</sup> edition, ICD-10) registered for the visit through the study years 2014–2016. The data also included sickness absences, employee sex and age and employers' industry and size. Pihlajalinna collected the data and the data was sent in pseudonymized format to the University of Tampere for analysis. There were no missing data.

The data initially comprised 78 507 patients. No sampling was done during data collection. The study population was limited to employees who had visited the OH unit during the study years and were aged 18–68 years. Only face-to-face contacts were included and occupational safety check-ups and other mandatory check-ups not initiated by the patient were excluded based on invoice codes. Patients who had no employer provided primary care service plan

1  
2  
3 were also excluded from the study. After these exclusions the study population comprised 59 676 patients. Diagnostic  
4 codes, using ICD-10, are mandatory for visits to a physician. We used the first (i.e. the main) ICD-10 diagnosis  
5 registered for each visit in this study. Most employers had all employees' sickness absence certificates entered  
6 into the medical records through a portal, even though they were certified outside the OHS.  
7  
8  
9

## 10 11 12 **Statistical analysis**

13  
14 We defined FA as the top decile of attenders.[2,14] We used visits to physicians, nurses, physiotherapists and  
15 psychologists to define frequent attenders and with our definition FA visited OH units 8 or more times yearly.[22] The  
16 general characteristics of FAs in OHS is described previously and we also made a secondary analysis of frequent  
17 attenders using only visits to the physician, which did not alter the results.[22] Patients being in the top decile in 2014  
18 but not in any other study year were categorized as 1-year-FA (1yFA) representing occasional FA. Patients who were in  
19 the top decile during all three study years (2014–2016) were categorized as persistent-FA (pFA). Patients who were  
20 not in the top decile in any of the study years but who had at least once contact with the OHS during the study years  
21 were used as a reference group (non-frequent attenders, non-FA). To avoid confounding, patients who were FA in  
22 2015 or 2016 but not during all three study years were excluded as they might have entered the practice during the  
23 study period, and without knowledge of their previous service use, they might have been wrongly categorized.  
24  
25  
26  
27  
28  
29  
30  
31  
32  
33  
34

35 We divided the study population by sex and into four age categories (18–34, 35–44, 45–54, 55–68) for  
36 characterization. Employer industries were categorized according to Statistics Finland /Statistical Classification of  
37 economic activities in the European Community (TOL2008/Nace Rev.2). We analyzed sickness absences with different  
38 categorizations. First we divided sickness absence episodes into groups according to the length: no absence, short  
39 (1–3 d), intermediate (4–14 d) and long (15 d or more) absence.[33] In addition, we looked at the total number of  
40 sickness absence days per year with two different categorizations (0, 1–15 or more than 15 days per year and short  
41 (1–3 d) intermediate (4–14 d) and long (15 d or more)). [34] Additional analysis using sickness absences as a  
42 continuous variable were conducted. When examining sickness absences yearly we included self-certified and nurse-  
43 certified sick-leaves. In the analysis of diagnostic codes associated with sickness absenteeism, only physician certified  
44 sick-leaves were used.  
45  
46  
47  
48  
49  
50  
51  
52  
53  
54

55  
56 Chi square and Kruskal-Wallis –tests were used to test for significant differences between groups. Multinomial logistic  
57 regression was used to analyze associations of the dependent variable FA-status (1yFA, pFA and non-FA) with the  
58  
59  
60

1  
2  
3 independent variable (occurrence of a sick-leave episode and number of sickness absence days yearly). The results  
4  
5 were adjusted for sex, age, industry, number of ICD-10 diagnoses and existence of cancer diagnosis (C00-C97). Odds  
6  
7 ratios (OR) with 95% confidence intervals (CI) were determined. Statistical analyses were conducted in University of  
8  
9 Tampere using IBM SPSS Statistics version 23. In all analyses P values less than 0.05 were considered statistically  
10  
11 significant.  
12

### 13 14 **Ethical considerations**

15  
16 The National Institute of Health and Welfare (THL/556/5.05.OO/2016) and the ethics committee of Pirkanmaa  
17  
18 Hospital District (ETL R16041) approved the study. According to Finnish legislation individual consent was not needed  
19  
20 as this is a large-scale register-based study where no single participant can be recognized.  
21  
22

### 23 24 25 **PATIENT AND PUBLIC INVOLVEMENT**

26  
27 As it is a study of medical records, patients were not involved.  
28  
29  
30  
31  
32  
33  
34  
35  
36  
37  
38  
39  
40  
41  
42  
43  
44  
45  
46  
47  
48  
49  
50  
51  
52  
53  
54  
55  
56  
57  
58  
59  
60

## RESULTS

Our study population constituted 59 676 individuals during the study years (2014–2016). The population included 592 pFA and 2468 1yFA in 2014. The latter group diminished due to loss for follow-up as time went on so that in 2015 there were 1986 individuals and in 2016 1391 individuals in 1yFA group. Figure 1 shows the flow of the study population. Table 1 below shows descriptive statistics of 1yFA, pFA and non-FA during the study years. There were more women than men in both 1yFA and pFA throughout the study years. Over 90% of the pFA group received a sick-leave certificate from a physician every year and 90% of the 1yFA group received one in the first year. Thereafter of the 1yFA group, 70% or more received a sick-leave certificate from a physician during the study. In 2016 almost 70% of pFA and 30% of 1yFA had a sick-leave longer than 15 days while only 9% of non-FA had such a long absence.

*[Insert Figure 1. Flow of the study population]*

Table 1. Characteristics of by status (1yFA, pFA and non-FA) yearly (2014–2016), n = 59 676

|                                         | 2014, n = 24772  |                |                     | 2015, n = 27116  |                |                     | 2016, n = 41241  |                |                     |
|-----------------------------------------|------------------|----------------|---------------------|------------------|----------------|---------------------|------------------|----------------|---------------------|
|                                         | 1yFA<br>n = 2468 | pFA<br>n = 592 | non-FA<br>n = 21712 | 1yFA<br>n = 1986 | pFA<br>n = 592 | non-FA<br>n = 24538 | 1yFA<br>n = 1391 | pFA<br>n = 592 | non-FA<br>n = 39258 |
|                                         | n (%)            | n (%)          | n (%)               | n (%)            | n (%)          | n (%)               | n (%)            | n (%)          | n (%)               |
| <b>Sex</b>                              |                  |                |                     |                  |                |                     |                  |                |                     |
| Male                                    | 1 134 (46)       | 262 (44)       | 12 783 (59)         | 924 (46)         | 262 (44)       | 14 628 (60)         | 679 (49)         | 262 (44)       | 22 277 (57)         |
| Female                                  | 1 334 (54)       | 330 (56)       | 8 929 (41)          | 1 062 (54)       | 330 (56)       | 9 910 (40)          | 712 (51)         | 330 (56)       | 16 981 (43)         |
| <b>Age</b>                              |                  |                |                     |                  |                |                     |                  |                |                     |
| 18–34                                   | 704 (29)         | 130 (22)       | 6 751 (31)          | 501 (25)         | 121 (20)       | 7 434 (30)          | 264 (19)         | 108 (18)       | 12 106 (31)         |
| 35–44                                   | 552 (22)         | 145 (25)       | 5 135 (24)          | 465 (24)         | 137 (23)       | 5 841 (24)          | 319 (23)         | 132 (22)       | 9 467 (24)          |
| 45–54                                   | 638 (26)         | 186 (31)       | 5 673 (26)          | 521 (26)         | 190 (32)       | 6 532 (27)          | 413 (30)         | 188 (32)       | 10 139 (26)         |
| 55–68                                   | 574 (23)         | 131 (22)       | 4 153 (19)          | 499 (25)         | 144 (25)       | 4 731 (19)          | 395 (28)         | 164 (28)       | 7 546 (19)          |
| <b>Absences</b>                         |                  |                |                     |                  |                |                     |                  |                |                     |
| Sickness absence certified by physician | 2 219 (90)       | 551 (93)       | 10 309 (47)         | 1 511 (76)       | 556 (94)       | 11 642 (47)         | 978 (70)         | 547 (92)       | 18 350 (47)         |
| 0 days /year                            | 207 (8)          | 33 (6)         | 9 554 (44)          | 377 (19)         | 26 (4)         | 10 374 (42)         | 315 (23)         | 34 (6)         | 16 873 (43)         |
| 1–15 days /year                         | 768 (31)         | 147 (25)       | 10 026 (46)         | 873 (44)         | 127 (22)       | 11 722 (48)         | 653 (47)         | 150 (25)       | 18 906 (48)         |
| >15 days /year                          | 1493 (61)        | 412 (69)       | 2 132 (10)          | 739 (37)         | 439 (74)       | 2 442 (10)          | 423 (30)         | 408 (69)       | 3 479 (9)           |

Statistically significant results with Chi square -tests, p<0.001

FA status was defined as the top decile of attenders (frequent attender 10%, FA10)

1yFA = Patients that were in the top decile of attenders in 2014

pFA = Patients that were in the top decile in all three study years (2014, 2015 and 2016)

non-FA = Patients that were never in the top decile were considered as a reference group, non-frequent attenders

1  
2  
3 As a whole the pFA group had a median of 16 absence episodes during the three study years, the 1yFA group had 7  
4 episodes and the non-FA group had a median of 2 episodes, all certified by a physician (table 2). The pFA group had a  
5 constant median 5 to 6 sickness absence episodes yearly whereas the 1yFA group had a median of 4 sickness absence  
6 episodes in 2014, after which the frequency of episodes diminished. However, the frequency of sickness episodes  
7 remained higher among the 1yFA group than in the non-FA group two years after the 1yFA group's frequent  
8 attendance ended.  
9  
10  
11  
12  
13  
14  
15

16 The lengths of sickness absence episodes are shown in table 2. The average length of a sickness absence episode is  
17 consistently high for the pFA group. It is equally high for 1yFA in the first study year, their year of frequent attendance,  
18 but the mean and median length of sickness absence reduces slowly, while remaining higher through the study years  
19 compared with the non-FA group. The median lengths of single absence episodes are equal between the groups. The  
20 median length of single sickness absence episode due to mental and behavioural disorders (F00–F99) was 9, 7 and 7  
21 days for 1yFA, pFA and non-FA respectively. The median lengths for musculoskeletal disorders (M00–M99) among  
22 1yFA, pFA and non-FA were 7, 5 and 5 days respectively (data not shown).  
23  
24  
25  
26  
27  
28  
29  
30  
31  
32  
33  
34  
35  
36  
37  
38  
39  
40  
41  
42  
43  
44  
45  
46  
47  
48  
49  
50  
51  
52  
53  
54  
55  
56  
57  
58  
59  
60

Table 2. Median and average lengths of sickness absence episodes, median and average number of absence days yearly and median and average number of written sickness absence certificates yearly (2014–2016) by frequent attender status, n = 33 592 (patients with a sickness absence certified by a physician)

|                                    | Total length of sickness absences per year |    | Average length of a single sickness absence episode |    | Number of written sickness absence certificates |    |
|------------------------------------|--------------------------------------------|----|-----------------------------------------------------|----|-------------------------------------------------|----|
|                                    | av.                                        | md | av.                                                 | md | av.                                             | md |
| <b>2014</b><br>(n = 23 232)        | ***                                        |    | ***                                                 |    | ***                                             |    |
| 1yFA                               | 46.1                                       | 23 | 9.2                                                 | 4  | 5.0                                             | 4  |
| pFA                                | 42.6                                       | 25 | 7.1                                                 | 4  | 6.0                                             | 5  |
| non-FA                             | 14.4                                       | 6  | 7.7                                                 | 3  | 1.9                                             | 1  |
| <b>2015</b><br>(n = 25 151)        | ***                                        |    | ***                                                 |    | ***                                             |    |
| 1yFA                               | 41.2                                       | 14 | 11.7                                                | 4  | 3.5                                             | 3  |
| pFA                                | 51.4                                       | 29 | 8.0                                                 | 4  | 6.4                                             | 6  |
| non-FA                             | 14.0                                       | 5  | 7.5                                                 | 3  | 1.9                                             | 1  |
| <b>2016</b><br>(n = 38 054)        | ***                                        |    | ***                                                 |    | ***                                             |    |
| 1yFA                               | 28.0                                       | 10 | 9.1                                                 | 4  | 3.1                                             | 2  |
| pFA                                | 51.6                                       | 24 | 8.8                                                 | 4  | 5.9                                             | 5  |
| non-FA                             | 12.5                                       | 5  | 6.9                                                 | 3  | 1.8                                             | 1  |
| <b>2014 – 2016</b><br>(n = 56 042) | ***                                        |    | ***                                                 |    | ***                                             |    |
| 1yFA                               | 82.5                                       | 41 | 9.8                                                 | 4  | 8.4                                             | 7  |
| pFA                                | 138.4                                      | 96 | 7.9                                                 | 4  | 17.4                                            | 16 |
| non-FA                             | 17.7                                       | 7  | 7.3                                                 | 3  | 2.4                                             | 2  |

Kruskal-Wallis Test, \*\*\* =  $p < 0.001$ , av. = average, md = median

FA status was defined as the top decile of attenders (frequent attender 10%, FA10)

1yFA = Patients that were in the top decile of attenders in 2014

pFA = Patients that were in the top decile in all three study years (2014, 2015 and 2016)

non-FA = Patients that were never in the top decile were considered as a reference group, non-frequent attenders.

1  
2  
3  
4  
5  
6  
7  
8  
9  
10  
11  
12  
13  
14  
15  
16  
17  
18  
19  
20  
21  
22  
23  
24  
25  
26  
27  
28  
29  
30  
31  
32  
33  
34  
35  
36  
37  
38  
39  
40  
41  
42  
43  
44  
45  
46  
47  
48  
49  
50  
51  
52  
53  
54  
55  
56  
57  
58  
59  
60

Throughout the study years long sickness absences (15 or more days yearly) were mostly due to musculoskeletal disorders (table 3). Injuries were the second largest diagnostic group for non-FA causing long absences while for 1yFA and pFA long absences were caused by mental and behavioural disorders. Musculoskeletal and mental disorders caused 64% of long sick-leave episodes for 1yFA and 63% for pFA, while for the non-FA group the proportion was 46%.

For peer review only



Table 3. Diagnostic codes associated with sickness absences of different lengths (for sickness absence certificates given by a physician), 2014 – 2016, n = number of sickness absence certificates

|                                                                             | 1yFA, n = 19 506   |                     |                           | pFA, n = 10 117    |                     |                           | non-FA, n = 74 176   |                       |                           | FA status was defined as the top decile of attenders (frequent |
|-----------------------------------------------------------------------------|--------------------|---------------------|---------------------------|--------------------|---------------------|---------------------------|----------------------|-----------------------|---------------------------|----------------------------------------------------------------|
|                                                                             | 1-3 days, n = 8597 | 4-14 days, n = 8261 | 15 or more days, n = 2648 | 1-3 days, n = 4732 | 4-14 days, n = 4357 | 15 or more days, n = 1028 | 1-3 days, n = 39 566 | 4-14 days, n = 28 243 | 15 or more days, n = 6367 |                                                                |
| <b>ICD-10</b>                                                               | n (%)              | n (%)               | n (%)                     | n (%)              | n (%)               | n (%)                     | n (%)                | n (%)                 | n (%)                     |                                                                |
| J00-J99 Diseases of the respiratory system                                  | 4020 (47)          | 1367 (17)           | 48 (2)                    | 2150 (45)          | 810 (17)            | 19 (2)                    | 20 856 (53)          | 6570 (23)             | 118 (2)                   |                                                                |
| M00-M99 Diseases of the musculoskeletal system and connective tissue        | 1545 (18)          | 3678 (45)           | 1248 (47)                 | 1028 (22)          | 2042 (47)           | 483 (47)                  | 5585 (14)            | 9820 (35)             | 1982 (31)                 |                                                                |
| S00-T98 Injury, poisoning and certain other consequences of external causes | 463 (5)            | 1045 (13)           | 366 (14)                  | 221 (5)            | 461 (11)            | 136 (13)                  | 2100 (5)             | 4640 (16)             | 1471 (23)                 |                                                                |
| F00-F99 Mental and behavioural disorders                                    | 281 (3)            | 809 (10)            | 439 (17)                  | 165 (4)            | 353 (8)             | 164 (16)                  | 829 (2)              | 2171 (8)              | 948 (15)                  |                                                                |
| A00-B99 Certain infectious and parasitic diseases                           | 603 (7)            | 145 (2)             | 4 (0)                     | 255 (5)            | 52 (1)              | 4 (0)                     | 2749 (7)             | 792 (3)               | 35 (1)                    |                                                                |
| Others                                                                      | 1685 (20)          | 1217 (15)           | 543 (21)                  | 913 (19)           | 639 (15)            | 222 (22)                  | 7447 (19)            | 42 500 (15)           | 1813 (28)                 |                                                                |

attender 10%, FA10)

1yFA = Patients that were in the top decile of attenders in 2014

pFA = Patients that were in the top decile in all three study years (2014, 2015 and 2016)

non-FA = Patients that were never in the top decile were considered as a reference group, non-frequent attenders

In the table are presented the five largest diagnostic groups that had the most sickness absence certificates written through the study years, arranged according to the number of certificates in each category

1  
2  
3 In the fully adjusted multinomial logistic regression model there was no significant difference between short absences  
4 between the groups (table 4). In the first year, pFA and 1yFA did not differ significantly in their risk of any length  
5 sickness absence. However, in the following years pFA had higher odds (OR 3.73, 95% CI 2.49–5.60 in 2016) of a long  
6 sickness absence than 1yFA. These groups did not differ in their risk for intermediate length absences. Throughout the  
7 study years both 1yFA (OR 1.44, 95% CI 1.23–1.69 in 2016) and pFA (OR 2.08, 95% CI 1.39–3.10 in 2016) had higher  
8 risk for intermediate length absences than non-FA. This association was enhanced when studying long absences. In  
9 2016 1yFA had higher odds (OR 2.95, 95% CI 2.50–3.49) for having a 15 or more days' absence than non-FA, as did pFA  
10 (OR 11.0, 95% CI 7.54–16.06).

11  
12 One day of sickness absence in any of the study years increases the likelihood of being occasional or persistent FA only  
13 slightly and the results are insignificant when comparing 1yFA with pFA (table 5). In table 6 can be seen characteristics  
14 associated with frequent attender status in sickness absences over 15 days. Female sex and morbidity (measured by  
15 number of different diagnoses given by a physician) were associated with frequent attender status in sickness  
16 absences over 15 days.

Table 4. Lengths of sickness absences associated with frequent attender status in multinomial logistic regression (adjusted for sex, age, field of industry, cancer dg (C00-C97) and number of different ICD10-diagnoses given by physicians), n = 24 772 – 41 241

|                                 | 1yFA vs. non-FA |               | pFA vs. non-FA |               | pFA vs. 1yFA |             |
|---------------------------------|-----------------|---------------|----------------|---------------|--------------|-------------|
|                                 | OR              | 95 % CI       | OR             | 95 % CI       | OR           | 95 % CI     |
| <b>Sickness absences (2014)</b> |                 |               |                |               |              |             |
| no sickness absence (0 days)    | 1.0             |               | 1.0            |               | 1.0          |             |
| short (1-3 days)                | 1.15            | 0.91 - 1.45   | 1.06           | 0.61 - 1.85   | 0.93         | 0.52 - 1.67 |
| intermediate length (4-14 days) | 2.34            | 1.96 - 2.80   | 2.33           | 1.55 - 3.51   | 1.00         | 0.65 - 1.53 |
| long (15 or more days)          | 13.10           | 11.07 - 15.50 | 18.27          | 12.54 - 26.60 | 1.39         | 0.94 - 2.07 |
| <b>Sickness absences (2015)</b> |                 |               |                |               |              |             |
| no sickness absence (0 days)    | 1.0             |               | 1.0            |               | 1.0          |             |
| short (1-3 days)                | 1.20            | 1.01 - 1.42   | 1.32           | 0.72 - 2.40   | 1.09         | 0.59 - 2.04 |
| intermediate length (4-14 days) | 1.89            | 1.64 - 2.17   | 2.92           | 1.87 - 4.57   | 1.55         | 0.97 - 2.46 |
| long (15 or more days)          | 4.48            | 3.88 - 5.16   | 17.96          | 11.83 - 27.25 | 4.01         | 2.60 - 6.18 |
| <b>Sickness absences (2016)</b> |                 |               |                |               |              |             |
| no sickness absence (0 days)    | 1.0             |               | 1.0            |               | 1.0          |             |
| short (1-3 days)                | 1.08            | 0.89 - 1.29   | 0.93           | 0.54 - 1.59   | 0.86         | 0.49 - 1.52 |
| intermediate length (4-14 days) | 1.44            | 1.23 - 1.69   | 2.08           | 1.39 - 3.10   | 1.44         | 0.94 - 2.20 |
| long (15 or more days)          | 2.95            | 2.50 - 3.49   | 11.00          | 7.54 - 16.06  | 3.73         | 2.49 - 5.60 |

OR = Odds ratio, CI = Confidence interval, 1.0 = reference group

FA status was defined as the top decile of attenders (frequent attender 10%, FA10)

1yFA = Patients that were in the top decile of attenders in 2014

pFA = Patients that were in the top decile in all three study years (2014, 2015 and 2016)

non-FA = Patients that were never in the top decile were considered as a reference group, non-frequent attenders.

1  
2  
3  
4  
5  
6  
7  
8  
9  
10  
11  
12  
13  
14  
15  
16  
17  
18  
19  
20  
21  
22  
23  
24  
25  
26  
27  
28  
29  
30  
31  
32  
33  
34  
35  
36  
37  
38  
39  
40  
41  
42  
43  
44  
45  
46  
47  
48  
49  
50  
51  
52  
53  
54  
55  
56  
57  
58  
59  
60

Table 5. Sickness absence associated with frequent attender status in multinomial logistic regression (adjusted for sex, age, field of industry, cancer dg (C00-C97) and number of different ICD10-diagnoses given by physicians), n = 24 772–41241

|                                       | 1yFA vs. non-FA |             | pFA vs. non-FA |             | pFA vs. 1yFA |             |
|---------------------------------------|-----------------|-------------|----------------|-------------|--------------|-------------|
|                                       | OR              | 95 % CI     | OR             | 95 % CI     | OR           | 95 % CI     |
| <b>Sickness absences (2014)</b>       |                 |             |                |             |              |             |
| A single sickness absence day in 2014 | 1.02            | 1.02 - 1.02 | 1.02           | 1.02 - 1.02 | 1.00         | 0.99 - 1.00 |
| <b>Sickness absences (2015)</b>       |                 |             |                |             |              |             |
| A single sickness absence day in 2015 | 1.01            | 1.01 - 1.01 | 1.01           | 1.01 - 1.02 | 1.00         | 1.00 - 1.00 |
| <b>Sickness absences (2016)</b>       |                 |             |                |             |              |             |
| A single sickness absence day in 2016 | 1.01            | 1.01 - 1.01 | 1.02           | 1.02 - 1.02 | 1.01         | 1.01 - 1.01 |

OR = Odds ratio, CI = Confidence interval

FA status was defined as the top decile of attenders (frequent attender 10%, FA10)

1yFA = Patients that were in the top decile of attenders in 2014

pFA = Patients that were in the top decile in all three study years (2014, 2015 and 2016)

non-FA = Patients that were never in the top decile were considered as a reference group, non-frequent attenders.

Table 6. Sickness absences >15 days associated with frequent attender status in multinomial logistic regression model (adjusted for age, field of industry and cancer dg (C00-C97) and number of different ICD10- diagnoses given by physicians), n = 24 772–41 241

|                                                         | 1yFA vs. non-FA |             | pFA vs. non-FA |             | pFA vs. 1yFA |             |
|---------------------------------------------------------|-----------------|-------------|----------------|-------------|--------------|-------------|
|                                                         | OR              | 95 % CI     | OR             | 95 % CI     | OR           | 95 % CI     |
| <b>Sickness absences (2014)</b>                         |                 |             |                |             |              |             |
| Sex                                                     |                 |             |                |             |              |             |
| Male                                                    | 1.0             |             | 1.0            |             | 1.0          |             |
| Female                                                  | 1.52            | 1.28 - 1.82 | 1.76           | 1.33 - 2.31 | 1.15         | 0.88 - 1.50 |
| Number of different ICD10-diagnoses given by physicians | 2.22            | 2.08 - 2.36 | 2.84           | 2.60 - 3.10 | 1.28         | 1.19 - 1.38 |
| <b>Sickness absences (2015)</b>                         |                 |             |                |             |              |             |
| Sex                                                     |                 |             |                |             |              |             |
| Male                                                    | 1.0             |             | 1.0            |             | 1.0          |             |
| Female                                                  | 1.48            | 1.21 - 1.81 | 1.47           | 1.12 - 1.93 | 0.99         | 0.74 - 1.33 |
| Number of different ICD10-diagnoses given by physicians | 1.71            | 1.58 - 1.84 | 2.93           | 2.67 - 3.22 | 1.71         | 1.57 - 1.88 |
| <b>Sickness absences (2016)</b>                         |                 |             |                |             |              |             |
| Sex                                                     |                 |             |                |             |              |             |
| Male                                                    | 1.0             |             | 1.0            |             | 1.0          |             |
| Female                                                  | 1.18            | 0.91 - 1.53 | 1.59           | 1.19 - 2.12 | 1.34         | 0.95 - 1.91 |
| Number of different ICD10-diagnoses given by physicians | 1.76            | 1.63 - 1.91 | 2.82           | 2.58 - 3.09 | 1.60         | 1.45 - 1.77 |

OR = Odds ratio, CI = Confidence interval, 1.0 = reference group

FA status was defined as the top decile of attenders (frequent attender 10%, FA10)

1yFA = Patients that were in the top decile of attenders in 2014

pFA = Patients that were in the top decile in all three study years (2014, 2015 and 2016)

non-FA = Patients that were never in the top decile were considered as a reference group, non-frequent attenders.

## DISCUSSION

Our results indicate that persistent frequent attenders have more and longer sickness absence episodes than other users of OH primary care. However, occasional frequent attenders also have more and longer sickness absences than non-frequent attenders, not only in their year of frequent attendance, but also in the following two years. Both frequent attender groups are also associated with increased risk of long sickness absences. These findings are novel and allow for better understanding of the risk for work disability associated with frequent attendance.

In a Finnish study on municipal employees sickness absence longer than 15 days was highly predictive of future disability pension and a Danish study showed that the longer the absence the higher the risk for disability pension in private sector employees. [27,34] In our study approximately 70% of persistent frequent attenders had a sickness absence >15 days yearly while for non-frequent attenders the proportion was a maximum of 10% through the study years. In 2014 almost two thirds of occasional frequent attenders had >15 days sickness absence and after two years follow up one third of occasional FA had >15 days of absence. Our results indicate that both persistent and occasional FA have more and longer sickness absences than an average user and thus might be at an increased risk of retirement due to disability.

Most long sickness absences were caused by diseases of the musculoskeletal system in all groups, but the proportions were higher for occasional and persistent FA than non-FA. The second largest group causing long absences was mental disorders for both occasional and persistent FA. Previous research indicates that musculoskeletal and mental disorders in particular cause recurrent sickness absences and that consultations for a specific illness tend to predict future consultations for the same illness group. [35,36] Detection of these individuals for follow up and necessary rehabilitative measures is important to maintain work ability. Additionally, in particular sick-leaves based on psychiatric and musculoskeletal reasons show increased risk in future for illness based retirement.[37,38] As our study shows that these diagnostic groups are associated with sickness absences of both occasional and persistent frequent attenders, both groups should be of special interest in OHS and GP setting treating working age patients.

Sickness absences predict future disability and retirement due to ill-health and these individuals should be identified for rehabilitation. This study indicates that both persistent and occasional frequent attenders are at risk of long sickness absences that in turn are associated with risk of disability pension. Vast use of services could be used as an early indicator for interventions to protect work ability. Also, as frequent attendance is mostly a self-limiting-condition

1  
2  
3 it has been argued whether occasional frequent attenders should be a target group for interventions at all.[39]

4  
5 However, our results indicate that occasional frequent attenders' sickness absences are higher than average users'  
6  
7 even after the consultation rates have reduced indicating that they are also in need of rehabilitative evaluation  
8  
9 bearing in mind work ability. In addition to occasional frequent attenders' risk of future absences, also persistent  
10  
11 frequent attenders need attention. Persistent frequent attenders appear to be a group of patients whose needs have  
12  
13 not been met. Both these patient groups should be identified and careful diagnostic evaluation should be conducted  
14  
15 to enable meeting their needs and reducing absences.  
16

17  
18 So far effective interventions on frequent attenders have been those based on in depth analysis of patient's reasons  
19  
20 for attendance and accordingly selected actions.[40] The measured outcomes have been mostly consultation  
21  
22 frequency or morbidity, but in the future, sickness absences and change in their frequency or length could be  
23  
24 measured as well. Early detection of individuals at risk of work disability based on readily available markers is crucial  
25  
26 for the implementation of timely interventions and rehabilitative measures to sustain patient's work ability.[38] Work  
27  
28 ability/disability and work relatedness could be also worth considering when discussing frequent attenders.  
29  
30 Determining how sickness absences are associated with frequent attendance is important due to the cost of  
31  
32 absenteeism on employers and society but also because of the effects on the individual – medically certified sickness  
33  
34 absences are also associated with mortality.[41,42]  
35

### 36 37 **Strengths and limitations**

38  
39  
40 The strengths of this study are the large study population from an OHS provider including wide range of industries and  
41  
42 company sizes from both rural and urban areas. The employees are representative of the working population in  
43  
44 Finland including all ages, employment lengths and status, which allows generalization outside this particular service  
45  
46 provider. The results can be generalized to OHS sector in Finland where variety of industries are present, and cautious  
47  
48 interpretations can be made concerning the working population in general. As no sampling was done, there should  
49  
50 not be selection bias in the frequent attender groups. Also, the use of medical records to define frequency of visits  
51  
52 removes inaccuracy related to self-reported utilization.[43] The novel longitudinal study design employed in this study  
53  
54 allows for examining sickness absences also after frequent attendance, which gives unique information on risks  
55  
56 associated with frequent attendance. To support this aim we chose to use FAs in 2014 only to represent occasional FA  
57  
58 allowing to examine sickness absences after consultation rates have diminished and to allow equal follow-up time  
59  
60

1  
2  
3 with the persistent FAs. Although there might be limitations to primary care services in OH, visits to nurses and  
4  
5 physicians are not restricted. In Finland the use of GPs in primary care by the working population appears to be scarce  
6  
7 compared to use of OHS primary care. [15,31,32] Thus, we assume that these results received from the OHS primary  
8  
9 care in Finland can be to some extent generalized to the working population using GP services in other countries.

10  
11  
12 However, this study is limited by lack of information on occupational status and education since they are not available  
13  
14 from medical records. In addition, loss to follow up in OHS may be larger than in the GP setting since patients can be  
15  
16 lost due to an employment relationship that ends. We did not have access to medical record data of other service  
17  
18 providers, thus the sample might include individuals that use other service sectors widely and this could not be  
19  
20 accounted for. However, there is evidence that when OH primary care is available, it is often used as the sole primary  
21  
22 care provider.[15] Also, we cannot track the service use of the patients lost for follow-up. This might add inaccuracy to  
23  
24 categorization of different frequent attender groups. However, we conducted confirmatory analyses on the subgroup  
25  
26 of 1391 occasional FAs whose service use was known for the entire study time, and the results did not differ  
27  
28 substantially. We have conducted also confirmatory analyses to ensure that we have sufficient data also on 1–3 days'  
29  
30 length sick-leaves. All sick-leave certificates of one of the largest employers on the Pihlajalinna client lists are entered  
31  
32 onto the Pihlajalinna sick-leave register. When comparing the proportions of different length absence episodes  
33  
34 between this employer and all the data the results did not differ to a great degree. We defined frequent attenders  
35  
36 according to attendance rates across the study population since we wanted to study the working population as a  
37  
38 whole. Our study population includes only the working, which narrows the differences between different age groups.  
39  
40 In our previous study [22] we analyzed the risk of being FA in different age groups and we found no significant  
41  
42 association of age with FA-status in our study population when adjusted for confounding. We used visits to all  
43  
44 healthcare professional in the OHS to categorize FA's. This should be taken into consideration when comparing  
45  
46 internationally although we made secondary analysis including only physician visits and the results did not alter.

## 47 48 49 **CONCLUSIONS**

50  
51 Both occasional and persistent frequent attenders have higher odds for long and intermediate length absences, which  
52  
53 suggests an elevated risk of future retirement due to disability. Frequent attenders should be identified in the working  
54  
55 age population and sickness absences should be taken into account when planning frequent attender rehabilitation  
56  
57 and interventions.  
58  
59  
60



1  
2  
3 In future, a longer follow-up of sickness absences would be useful to see whether sickness absence rate eventually  
4  
5 equalizes with the non-FA group. More understanding is needed of how frequent attendance is associated with  
6  
7 disability and retirement due to ill-health.  
8  
9  
10  
11  
12  
13  
14  
15  
16  
17  
18  
19  
20  
21  
22  
23  
24  
25  
26  
27  
28  
29  
30  
31  
32  
33  
34  
35  
36  
37  
38  
39  
40  
41  
42  
43  
44  
45  
46  
47  
48  
49  
50  
51  
52  
53  
54  
55  
56  
57  
58  
59  
60

For peer review only

1  
2  
3  
4  
5  
6  
7  
8  
9  
10  
11  
12  
13  
14  
15  
16  
17  
18  
19  
20  
21  
22  
23  
24  
25  
26  
27  
28  
29  
30  
31  
32  
33  
34  
35  
36  
37  
38  
39  
40  
41  
42  
43  
44  
45  
46  
47  
48  
49  
50  
51  
52  
53  
54  
55  
56  
57  
58  
59  
60

### **FUNDING**

This study is part of the “Effectiveness and Indicators of Occupational Health Services” supported by the European Social Fund [reference number S20659].

### **COMPETING INTERESTS**

The Authors declare that there is no conflict of interest.

### **ACKNOWLEDGEMENTS**

The authors acknowledge the participation of the occupational health staff in the study and all the individual clients who are part of this study.

### **AUTHOR’S CONTRIBUTIONS**

The study was conceptualized by JU and the study design was planned by all the authors (TR, SA, NT, MS, MV and JU). Planning of data collection and analysis was done by all authors (TR, SA, NT, MS, MV and JU). NT analyzed the data. TR wrote the first draft and all authors (TR, SA, NT, MS, MV and JU) contributed to the final version by revising and commenting on the draft. All authors approved the final version.

### **AVAILABILITY OF DATA AND MATERIAL**

The data that support the findings of this study are available from Pihlajalinna Työterveys but restrictions apply to the availability of these data, which were used under license for the current study, and so are not publicly available. Data are however available from the authors upon reasonable request and with permission of Pihlajalinna Työterveys.

## REFERENCES

- 1 Gill D, Dawes M, Sharpe M, *et al.* GP frequent consulters: Their prevalence, natural history, and contribution to rising workload. *Br J Gen Pract* 1998;**48**:1856–7.
- 2 Smits FT, Brouwer HJ, ter Riet G, *et al.* Epidemiology of frequent attenders: a 3-year historic cohort study comparing attendance, morbidity and prescriptions of one-year and persistent frequent attenders. *BMC Public Health* 2009;**9**. doi:10.1186/1471-2458-9-36
- 3 Patel S, Kai J, Atha C, *et al.* Clinical characteristics of persistent frequent attenders in primary care: Case-control study. *Fam Pract* 2015;**32**:624–30. doi:10.1093/fampra/cmz076
- 4 Droomers M, Westert GP. Do lower socioeconomic groups use more health services, because they suffer from more illnesses? *Eur J Public Health* 2004;**14**:311–3.
- 5 Bergh H, Baigi A, Marklund B. Consultations for injuries by frequent attenders are found to be medically appropriate from general practitioners' perspective. *Scand J Public Health* 2005;**33**:228–32. doi:10.1080/14034940510005761
- 6 Pymont C, Butterworth P. Longitudinal cohort study describing persistent frequent attenders in Australian primary healthcare. *BMJ Open* 2015;**5**:e008975. doi:10.1136/bmjopen-2015-008975
- 7 Smits FT, Brouwer HJ, Zwinderman AH, *et al.* Why do they keep coming back? Psychosocial etiology of persistence of frequent attendance in primary care: A prospective cohort study. *J Psychosom Res* 2014;**77**:492–503. doi:10.1016/j.jpsychores.2014.08.003
- 8 Vedsted P, Christensen MB. Frequent attenders in general practice care: A literature review with special reference to methodological considerations. *Public Health* 2005;**119**:118–37. doi:10.1016/j.puhe.2004.03.007
- 9 Scaife B, Gill P, Heywood P, *et al.* Socio-economic characteristics of adult frequent attenders in general practice: secondary analysis of data. *Fam Pract* 2000;**17**:298–304. doi:10.1093/fampra/17.4.298
- 10 Al-Windi A, Elmfeldt D, Svärdsudd K. The influence of sociodemographic characteristics on health care utilisation in a Swedish municipality. *Ups J Med Sci* 2004;**109**:33–42. doi:10.3109/2000-1967-108
- 11 Karlsson H, Lehtinen V, Joukamaa M. Frequent Attenders of Finnish Public Primary Health-Care -

1  
2  
3  
4  
5  
6  
7  
8  
9  
10  
11  
12  
13  
14  
15  
16  
17  
18  
19  
20  
21  
22  
23  
24  
25  
26  
27  
28  
29  
30  
31  
32  
33  
34  
35  
36  
37  
38  
39  
40  
41  
42  
43  
44  
45  
46  
47  
48  
49  
50  
51  
52  
53  
54  
55  
56  
57  
58  
59  
60

Sociodemographic Characteristics and Physical Morbidity. *Fam Pract* 1994;**11**:424–30.

doi:10.1093/fampra/11.4.424

- 12 Bergh H, Baigi A, Månsson J, *et al.* Predictive factors for long-term sick leave and disability pension among frequent and normal attenders in primary health care over 5 years. *Public Health* 2007;**121**:25–33.

doi:10.1016/j.puhe.2006.08.018

- 13 Jyväsjärvi S, Keinänen-Kiukaanniemi S, Väisänen E, *et al.* Frequent attenders in a Finnish health centre: morbidity and reasons for encounter. *Scand J Prim Health Care* 1998;**16**:141–8.

doi:10.1080/028134398750003089

- 14 Luciano J V, Fernández A, Pinto-Meza A, *et al.* Frequent attendance in primary care: comparison and implications of different definitions. *Br J Gen Pract* 2010;**60**:e49-55. doi:10.3399/bjgp10X483139

- 15 Ikonen A, Räsänen K, Manninen P, *et al.* Use of health services by Finnish employees in regard to health-related factors: The population-based Health 2000 study. *Int Arch Occup Environ Health* 2013;**86**:451–62.

doi:10.1007/s00420-012-0778-0

- 16 Lappalainen K, Aminoff M, Hakulinen H, *et al.* *Työterveyshuolto Suomessa vuonna 2015 [Occupational healthcare in Finland 2015 Report] (In Finnish with english summary)*. Työterveyslaitos 2016.

- 17 Laaksonen M, Rantala J, Järnefelt N, *et al.* *Työkyvyttömyyden vuoksi menetetty työura. [Loss of working career due to illness based retirement] (In Finnish with english summary)*. Finnish Centre for Pensions (Eläketurvakeskus) 2016.

- 18 Henderson M, Glozier N, Elliot KH. Editorials: Long term sickness absence. *BMJ Br Med J* 2005;**330**:802–3.

doi:10.1136/bmj.330.7499.1087-a

- 19 Pekkala J, Blomgren J, Pietiläinen O, *et al.* Occupational class differences in diagnostic-specific sickness absence: a register-based study in the Finnish population. *BMC Public Health* 2017;**17**. doi:10.1186/s12889-017-4674-0

- 20 Bergh H, Marklund B. Characteristics of frequent attenders in different age and sex groups in primary health care. *Scand J Prim Health Care* 2003;**21**:171–7. doi:10.1080/02813430310001149

- 1  
2  
3 21 Karlsson H, Lehtinen V, Joukamaa M. Psychiatric morbidity among frequent attender patients in primary care.  
4  
5 *Gen Hosp Psychiatry* 1995;**17**:19–25. doi:10.1016/0163-8343(94)00059-M  
6  
7  
8 22 Reho T, Atkins S, Talola N, *et al.* Frequent attenders in occupational health primary care – a cross-sectional  
9  
10 study. *Scand J Public Health* Published Online First: 2018. doi:10.1177/1403494818777436  
11  
12  
13 23 Kimanen A, Rautio M, Manninen P, *et al.* Primary care visits to occupational health physicians and nurses in  
14  
15 Finland. *Scand J Public Health* 2011;**39**:525–32. doi:10.1177/1403494811399651  
16  
17  
18 24 Ikonen A, Räsänen K, Manninen P, *et al.* Work-Related Primary Care in Occupational Health Physician's  
19  
20 Practice. *J Occup Rehabil* 2012;**22**:88–96. doi:10.1007/s10926-011-9325-1  
21  
22  
23 25 Hultin H, Lindholm C, Möller J, *et al.* Is There an Association between Long-Term Sick Leave and Disability  
24  
25 Pension and Unemployment beyond the Effect of Health Status? – A Cohort Study. *PLoS One* 2012;**7**:e35614.  
26  
27 doi:10.1371/journal.pone.0035614  
28  
29 26 Hultin H, Lindholm C, Malfert M, *et al.* Short-term sick leave and future risk of sickness absence and  
30  
31 unemployment - the impact of health status. *BMC Public Health* 2012;**12**:861. doi:10.1186/1471-2458-12-861  
32  
33  
34 27 Lund T, Kivimäki M, Labriola M, *et al.* Using administrative sickness absence data as a marker of future  
35  
36 disability pension: The prospective DREAM study of Danish private sector employees. *Occup Environ Med*  
37  
38 2008;**65**:28–31. doi:10.1136/oem.2006.031393  
39  
40  
41 28 Van Oostrom S, Driessen M, de Vet H, *et al.* Workplace interventions for preventing work disability (Review).  
42  
43 *Cochrane Database Syst Rev* 2009:1–67.  
44  
45  
46 29 Taimela S, Justen S, Aronen P, *et al.* An occupational health intervention programme for workers at high risk  
47  
48 for sickness absence. Cost effectiveness analysis based on a randomised controlled trial. *Occup Env Med*  
49  
50 2008;**65**:242–8.  
51  
52  
53 30 Kant I, Jansen NWH, van Amelsvoort LGPM, *et al.* Structured early consultation with the occupational  
54  
55 physician reduces sickness absence among office workers at high risk for long-term sickness absence: A  
56  
57 randomized controlled trial. *J Occup Rehabil* 2008;**18**:79–86. doi:10.1007/s10926-007-9114-z  
58  
59  
60 31 Virtanen P, Mattila K. Työterveyslääkärin potilas käy myös terveyskeskuksessa, tosin harvoin [Patients of

1  
2  
3  
4  
5  
6  
7  
8  
9  
10  
11  
12  
13  
14  
15  
16  
17  
18  
19  
20  
21  
22  
23  
24  
25  
26  
27  
28  
29  
30  
31  
32  
33  
34  
35  
36  
37  
38  
39  
40  
41  
42  
43  
44  
45  
46  
47  
48  
49  
50  
51  
52  
53  
54  
55  
56  
57  
58  
59  
60

occupational health physicians also visit health centre GPs, albeit seldom] (In Finnish with English summary).  
*Suom Lääkäril* 2011;**47**:3583–6.

32 Vaarama M, Moisio P, Karvonen S. Suomalaisten hyvinvointi 2010 [Finnish well-being 2010] (In Finnish).  
Helsinki: 2010.

33 Laaksonen M, He L, Pitkäniemi J. The durations of past sickness absences predict future absence episodes. *J Occup Environ Med* 2013;**55**:87–92. doi:10.1097/JOM.0b013e318270d724

34 Kivimäki M, Forma P, Wikström J, *et al.* Sickness absence as a risk marker of future disability pension: the 10-town study. *J Epidemiol Community Health* 2004;**58**:710–1. doi:10.1136/jech.2003.015842

35 Roelen C, Koopmans P, Anema J, *et al.* Recurrence of Medically Certified Sickness Absence According to Diagnosis: A Sickness Absence Register Study. *J Occupational Rehabil* 2010;**20**:113–21. doi:10.1007/s10926-009-9226-8

36 Jordan K, Ong BN, Croft P. Previous consultation and self reported health status as predictors of future demand for primary care. *J Epidemiol Community Health* 2003;**57**:109–13.

37 Kivimäki M, Ferrie JE, Hagberg J, *et al.* Diagnosis-specific sick leave as a risk marker for disability pension in a Swedish population. *J Epidemiol Community Health* 2007;**61**:915–20. doi:10.1136/jech.2006.055426

38 Alexanderson K, Kivimäki M, Ferrie JE, *et al.* Diagnosis-specific sick leave as a long-term predictor of disability pension: A 13-year follow-up of the GAZEL cohort study. *J Epidemiol Community Health* 2012;**66**:155–9. doi:10.1136/jech.2010.126789

39 Smits FTM, Brouwer HJ, van Weert HCP, *et al.* Predictability of persistent frequent attendance: A historic 3-year cohort study. *Br J Gen Pract* 2009;**59**:114–9. doi:10.3399/bjgp09X395120

40 Haroun D, Smits F, van Etten-Jamaludin F, *et al.* The effects of interventions on quality of life, morbidity and consultation frequency in frequent attenders in primary care: A systematic review. *Eur J Gen Pract* 2016;**22**:71–82. doi:10.3109/13814788.2016.1161751

41 Kivimäki M, Head J, Ferrie JE, *et al.* Sickness absence as a global measure of health: evidence from mortality in the Whitehall II prospective cohort study. *BMJ* 2003;**327**. doi:10.1136/bmj.327.7411.364

1  
2  
3 42 Anema JR, van der Beek AJ. Medically certified sickness absence. *BMJ* 2008;**337**:a1174.  
4  
5 doi:10.1136/BMJ.A1174  
6

7  
8 43 Bellón JÁ, Lardelli P, De J, *et al.* Validity of self reported utilisation of primary health care services in an urban  
9  
10 population in Spain. *J Epidemiol Community Heal* 2000;**54**:544–51.  
11  
12  
13  
14  
15  
16  
17  
18  
19  
20  
21  
22  
23  
24  
25  
26  
27  
28  
29  
30  
31  
32  
33  
34  
35  
36  
37  
38  
39  
40  
41  
42  
43  
44  
45  
46  
47  
48  
49  
50  
51  
52  
53  
54  
55  
56  
57  
58  
59  
60

For peer review only

1  
2  
3  
4  
5  
6  
7  
8  
9  
10  
11  
12  
13  
14  
15  
16  
17  
18  
19  
20  
21  
22  
23  
24  
25  
26  
27  
28  
29  
30  
31  
32  
33  
34  
35  
36  
37  
38  
39  
40  
41  
42  
43  
44  
45  
46  
47  
48  
49  
50  
51  
52  
53  
54  
55  
56  
57  
58  
59  
60

**FIGURES**

Figure 1. Flow of the study population

For peer review only





Figure 1. Flow of the study population  
 1yFA = Patients that were in the top decile of attenders in 2014  
 pFA = Patients that were in the top decile in all three study years (2014, 2015 and 2016)  
 non-FA = Patients that were never in the top decile were considered as a reference group, non-frequent attenders

90x90mm (300 x 300 DPI)

STROBE Statement—checklist of items that should be included in reports of observational studies

|                           | Item No. | Recommendation                                                                                                                                                                                                                                                                                                                                                                                                                                                         | Page No. |
|---------------------------|----------|------------------------------------------------------------------------------------------------------------------------------------------------------------------------------------------------------------------------------------------------------------------------------------------------------------------------------------------------------------------------------------------------------------------------------------------------------------------------|----------|
| <b>Title and abstract</b> | 1        | (a) Indicate the study’s design with a commonly used term in the title or the abstract                                                                                                                                                                                                                                                                                                                                                                                 | 2        |
|                           |          | (b) Provide in the abstract an informative and balanced summary of what was done and what was found                                                                                                                                                                                                                                                                                                                                                                    | 2        |
| <b>Introduction</b>       |          |                                                                                                                                                                                                                                                                                                                                                                                                                                                                        |          |
| Background/rationale      | 2        | Explain the scientific background and rationale for the investigation being reported                                                                                                                                                                                                                                                                                                                                                                                   | 3-4      |
| Objectives                | 3        | State specific objectives, including any prespecified hypotheses                                                                                                                                                                                                                                                                                                                                                                                                       | 4        |
| <b>Methods</b>            |          |                                                                                                                                                                                                                                                                                                                                                                                                                                                                        |          |
| Study design              | 4        | Present key elements of study design early in the paper                                                                                                                                                                                                                                                                                                                                                                                                                | 5        |
| Setting                   | 5        | Describe the setting, locations, and relevant dates, including periods of recruitment, exposure, follow-up, and data collection                                                                                                                                                                                                                                                                                                                                        | 5-6      |
| Participants              | 6        | (a) <i>Cohort study</i> —Give the eligibility criteria, and the sources and methods of selection of participants. Describe methods of follow-up<br><i>Case-control study</i> —Give the eligibility criteria, and the sources and methods of case ascertainment and control selection. Give the rationale for the choice of cases and controls<br><i>Cross-sectional study</i> —Give the eligibility criteria, and the sources and methods of selection of participants | 5-6      |
|                           |          | (b) <i>Cohort study</i> —For matched studies, give matching criteria and number of exposed and unexposed<br><i>Case-control study</i> —For matched studies, give matching criteria and the number of controls per case                                                                                                                                                                                                                                                 | 5-6      |
| Variables                 | 7        | Clearly define all outcomes, exposures, predictors, potential confounders, and effect modifiers. Give diagnostic criteria, if applicable                                                                                                                                                                                                                                                                                                                               | 6        |
| Data sources/ measurement | 8*       | For each variable of interest, give sources of data and details of methods of assessment (measurement). Describe comparability of assessment methods if there is more than one group                                                                                                                                                                                                                                                                                   | 5-6      |
| Bias                      | 9        | Describe any efforts to address potential sources of bias                                                                                                                                                                                                                                                                                                                                                                                                              | 5-6, 16  |
| Study size                | 10       | Explain how the study size was arrived at                                                                                                                                                                                                                                                                                                                                                                                                                              | 5        |

Continued on next page

|                        |     |                                                                                                                                                                                                                    |                |
|------------------------|-----|--------------------------------------------------------------------------------------------------------------------------------------------------------------------------------------------------------------------|----------------|
| Quantitative variables | 11  | Explain how quantitative variables were handled in the analyses. If applicable, describe which groupings were chosen and why                                                                                       | 5-6            |
| Statistical methods    | 12  | (a) Describe all statistical methods, including those used to control for confounding                                                                                                                              | 6              |
|                        |     | (b) Describe any methods used to examine subgroups and interactions                                                                                                                                                | 6              |
|                        |     | (c) Explain how missing data were addressed                                                                                                                                                                        | 16-17          |
|                        |     | (d) <i>Cohort study</i> —If applicable, explain how loss to follow-up was addressed                                                                                                                                | 16-17          |
|                        |     | <i>Case-control study</i> —If applicable, explain how matching of cases and controls was addressed<br><i>Cross-sectional study</i> —If applicable, describe analytical methods taking account of sampling strategy |                |
|                        |     | (e) Describe any sensitivity analyses                                                                                                                                                                              | 5, 16-17       |
| <b>Results</b>         |     |                                                                                                                                                                                                                    |                |
| Participants           | 13* | (a) Report numbers of individuals at each stage of study—eg numbers potentially eligible, examined for eligibility, confirmed eligible, included in the study, completing follow-up, and analysed                  | 5, 7, figure 1 |
|                        |     | (b) Give reasons for non-participation at each stage                                                                                                                                                               | 5, 7, figure 1 |
|                        |     | (c) Consider use of a flow diagram                                                                                                                                                                                 | 7, figure 1    |
| Descriptive data       | 14* | (a) Give characteristics of study participants (eg demographic, clinical, social) and information on exposures and potential confounders                                                                           | 7-8, 12        |
|                        |     | (b) Indicate number of participants with missing data for each variable of interest                                                                                                                                | 5              |
|                        |     | (c) <i>Cohort study</i> —Summarise follow-up time (eg, average and total amount)                                                                                                                                   | 7              |
| Outcome data           | 15* | <i>Cohort study</i> —Report numbers of outcome events or summary measures over time                                                                                                                                | 7-9            |
|                        |     | <i>Case-control study</i> —Report numbers in each exposure category, or summary measures of exposure                                                                                                               |                |
|                        |     | <i>Cross-sectional study</i> —Report numbers of outcome events or summary measures                                                                                                                                 |                |
| Main results           | 16  | (a) Give unadjusted estimates and, if applicable, confounder-adjusted estimates and their precision (eg, 95% confidence interval). Make clear which confounders were adjusted for and why they were included       | 13-14          |
|                        |     | (b) Report category boundaries when continuous variables were categorized                                                                                                                                          | 6              |
|                        |     | (c) If relevant, consider translating estimates of relative risk into absolute risk for a meaningful time period                                                                                                   | N/A            |

Continued on next page

|                          |    |                                                                                                                                                                            |       |
|--------------------------|----|----------------------------------------------------------------------------------------------------------------------------------------------------------------------------|-------|
| Other analyses           | 17 | Report other analyses done—eg analyses of subgroups and interactions, and sensitivity analyses                                                                             | 9-10  |
| <b>Discussion</b>        |    |                                                                                                                                                                            |       |
| Key results              | 18 | Summarise key results with reference to study objectives                                                                                                                   | 15    |
| Limitations              | 19 | Discuss limitations of the study, taking into account sources of potential bias or imprecision. Discuss both direction and magnitude of any potential bias                 | 16-17 |
| Interpretation           | 20 | Give a cautious overall interpretation of results considering objectives, limitations, multiplicity of analyses, results from similar studies, and other relevant evidence | 16-17 |
| Generalisability         | 21 | Discuss the generalisability (external validity) of the study results                                                                                                      | 17    |
| <b>Other information</b> |    |                                                                                                                                                                            |       |
| Funding                  | 22 | Give the source of funding and the role of the funders for the present study and, if applicable, for the original study on which the present article is based              | 17    |

\*Give information separately for cases and controls in case-control studies and, if applicable, for exposed and unexposed groups in cohort and cross-sectional studies.

**Note:** An Explanation and Elaboration article discusses each checklist item and gives methodological background and published examples of transparent reporting. The STROBE checklist is best used in conjunction with this article (freely available on the Web sites of PLoS Medicine at <http://www.plosmedicine.org/>, Annals of Internal Medicine at <http://www.annals.org/>, and Epidemiology at <http://www.epidem.com/>). Information on the STROBE Initiative is available at [www.strobe-statement.org](http://www.strobe-statement.org).

# BMJ Open

## Occasional and persistent frequent attenders and sickness absences in occupational health primary care – a longitudinal study in Finland

|                                 |                                                                                                                                                                                                                                                                                                                                                                                                                                                                                                                                                                                                                                                                                                 |
|---------------------------------|-------------------------------------------------------------------------------------------------------------------------------------------------------------------------------------------------------------------------------------------------------------------------------------------------------------------------------------------------------------------------------------------------------------------------------------------------------------------------------------------------------------------------------------------------------------------------------------------------------------------------------------------------------------------------------------------------|
| Journal:                        | <i>BMJ Open</i>                                                                                                                                                                                                                                                                                                                                                                                                                                                                                                                                                                                                                                                                                 |
| Manuscript ID                   | bmjopen-2018-024980.R3                                                                                                                                                                                                                                                                                                                                                                                                                                                                                                                                                                                                                                                                          |
| Article Type:                   | Research                                                                                                                                                                                                                                                                                                                                                                                                                                                                                                                                                                                                                                                                                        |
| Date Submitted by the Author:   | 20-Dec-2018                                                                                                                                                                                                                                                                                                                                                                                                                                                                                                                                                                                                                                                                                     |
| Complete List of Authors:       | Reho, Tiia; Tampereen yliopisto Laaketieteen yksikko, Faculty of Medicine and Life Sciences; Pihlajalinna, Työterveys<br>Atkins, Salla; Tampereen yliopisto Laaketieteen yksikko, New Social Research and Faculty of Social Sciences; Karolinska Institutet, Department of Public Health Sciences<br>Talola, Nina; Tampereen yliopisto Laaketieteen yksikko, Faculty of Medicine and Life Sciences<br>Sumanen, Markku; Tampereen yliopisto Laaketieteen yksikko, Faculty of Medicine and Life Sciences<br>Viljamaa, Mervi; Pihlajalinna, Työterveys<br>Uitti, Jukka; Tampereen yliopisto Laaketieteen yksikko, Faculty of Medicine and Life Sciences; Työterveyslaitos Tampereen aluetoimipiste |
| <b>Primary Subject Heading</b>: | Public health                                                                                                                                                                                                                                                                                                                                                                                                                                                                                                                                                                                                                                                                                   |
| Secondary Subject Heading:      | Occupational and environmental medicine                                                                                                                                                                                                                                                                                                                                                                                                                                                                                                                                                                                                                                                         |
| Keywords:                       | sickness absence, occupational health, PRIMARY CARE, longitudinal studies, PUBLIC HEALTH, health care utilisation                                                                                                                                                                                                                                                                                                                                                                                                                                                                                                                                                                               |
|                                 |                                                                                                                                                                                                                                                                                                                                                                                                                                                                                                                                                                                                                                                                                                 |

SCHOLARONE™  
Manuscripts

1  
2  
3  
4  
5  
6  
7  
8  
9  
10  
11  
12  
13  
14  
15  
16  
17  
18  
19  
20  
21  
22  
23  
24  
25  
26  
27  
28  
29  
30  
31  
32  
33  
34  
35  
36  
37  
38  
39  
40  
41  
42  
43  
44  
45  
46  
47  
48  
49  
50  
51  
52  
53  
54  
55  
56  
57  
58  
59  
60

Research article

Corresponding author

Tiia TM Reho

Tampere University, Faculty of Medicine and Health Technology

PB 100

FI-33014 UNIVERSITY OF TAMPERE

FINLAND

Email: [tiia.reho@gmail.com](mailto:tiia.reho@gmail.com)

+358504512123

## Occasional and persistent frequent attenders and sickness absences in occupational health primary care – a longitudinal study in Finland

Tiia TM Reho <sup>1,2</sup> MD

Salla A Atkins <sup>3,4</sup> PhD

Nina Talola <sup>1</sup> Msc

Markku PT Sumanen<sup>1</sup> MD, PhD

Mervi Viljamaa <sup>2</sup> MD, PhD

Jukka Uitti <sup>1,5,6</sup> MD, PhD

1 Tampere University, Faculty of Medicine and Health Technology, Tampere, Finland

2 Pihlajalinna Työterveys, Tampere, Finland

3 Tampere University, New Social Research and Faculty of Social Sciences, Tampere, Finland

4 Karolinska Institutet, Department of Public Health Sciences, Stockholm, Sweden

5 Finnish Institute of Occupational Health, Tampere, Finland

6 Clinic of Occupational Medicine, Tampere University Hospital, Tampere, Finland

*Key words:* sickness absence; occupational health; primary health care; longitudinal studies; public health; access to health care

## ABSTRACT

*Objectives* Frequent attenders create a substantial portion of primary care workload but little is known about frequent attenders' sickness absences. The aim of the study is to investigate how occasional and persistent frequent attendance is associated with sickness absences among the working population in occupational health (OH) primary care.

*Setting and participants* This is a longitudinal study using medical record data (2014–2016) from an OH care provider in Finland. In total, 59 676 patients were included and categorized into occasional and persistent frequent attenders (FA) or non-frequent attenders (non-FA). Sick-leave episodes and their lengths were collected along with associated diagnostic codes. Logistic regression was used to analyze associations between FA status and sick-leaves of different lengths (1-3, 4-14 and 15 or more days).

*Results* Both occasional and persistent FA had more and longer duration of sick-leave than non-FA through the study years. Persistent frequent attenders had consistently high absence rates. Occasional FA had elevated absence rates even two years after their frequent attendance period. Persistent FAs (OR=11 95% CI 7.54-16.06 in 2016) and occasional-FAs (OR=2.95 95% CI 2.50-3.49 in 2016) were associated with long (15 or more days) sickness absence when compared with non-FA. Both groups of FA's had an increased risk of long term sick-leave indicating a risk of disability pension.

*Conclusion* Both occasional and persistent frequent attenders should be identified in primary care units caring for working age patients. As frequent attendance is associated with long sickness absences and possibly disability pensions, rehabilitation should be directed at this group to prevent work disability.

## STRENGTHS AND LIMITATIONS OF THIS STUDY

- The study relies on large nationwide data including employees from rural and urban areas and public and private employers
- The longitudinal study design allows for examining sickness absences also after consultation rates reduce
- The use of medical records to define frequency of visits and sickness absences removes inaccuracy related to self-reporting

1  
2  
3  
4  
5  
6  
7  
8  
9  
10  
11  
12  
13  
14  
15  
16  
17  
18  
19  
20  
21  
22  
23  
24  
25  
26  
27  
28  
29  
30  
31  
32  
33  
34  
35  
36  
37  
38  
39  
40  
41  
42  
43  
44  
45  
46  
47  
48  
49  
50  
51  
52  
53  
54  
55  
56  
57  
58  
59  
60

- The study lacks information on occupational status, education and use of other service providers as these are not available from occupational health medical records
- Loss to follow up in OHS is larger than in the GP setting since patients can be lost due to an employment relationship that ends

For peer review only



## INTRODUCTION

Frequent attendance is a costly and burdensome phenomenon for healthcare providers, society and patients.

Patients, often referred to as frequent attenders (FA), visit healthcare units repeatedly and constitute a substantial portion of both physician's time and healthcare costs.[1,2] On the other hand, FAs appear to be a vulnerable group of patients that suffer from multimorbidity, medically unexplained symptoms and low quality of life.[3–5] For most patients frequent attendance is transient while a group of persistent FAs continue recurrent visits for extended periods of time.[2,6] Research indicates that persistent FAs often suffer from some combination of somatic, psychological and social problems and are prone to anxiety and worry more than transient FAs are.[3,6,7]

Frequent attenders in general practice (GP) are often unemployed or (disability)pensioners but to date there is little known about the relationship between frequent attendance and sickness absences among the working population. [8–11] The available research indicates that chronic disease and negative life events are predictive of long term sickness absence among one year FAs.[12] A Swedish study in GP setting showed that 19% of FA's versus 6% of non-FA's received a long term sickness absence or disability pension over 5 years' follow-up.[12] Also being on sick-leave or on disability pension increased the mean number of visits in GP setting and was associated with being a frequent attender.[10,13,14] However, there are no data available on how occasional and persistent FAs differ in terms of sick-leave and if frequent attendance is predictive of future sickness absences. Little is also known about the diagnostic groups associated with FAs' sickness absences and whether these patterns are similar for occasional and persistent frequent attenders. There is little research on working age patients alone, and most research concerning working age patients is conducted in GP setting. OH primary care in Finland is an ideal place to study working age patients solely as OHs primary care is available to 90% of the working population and often used as the sole primary care provider. [15,16]

In Finland the proportion of time spent on disability pension is increasingly due to mental disorders, in particular depression.[17] In turn, musculoskeletal and mental disorders are the most common causes for long term sickness absences.[18,19] Both diagnostic groups are also associated with frequent attendance in the Nordic countries in a GP setting and in occupational health (OH) primary care. [20–22] Research shows that chronic illnesses that diminish work ability and symptoms related to work are associated with visiting OH primary care.[23] In the same setting, in almost half of the visits caused by mental reasons and in one third of visits due to musculoskeletal reasons, a sickness absence certificate was given.[24] These associations suggest that FAs could be a potential risk group for sickness

1  
2  
3 absences and work disability. To grasp the full picture of frequent attendance and the impact on society and  
4  
5 individuals we need to know if and how sickness absenteeism is associated with high use of services.  
6  
7

8 Understanding the association of frequent attendance with sickness absenteeism is vital to enable healthcare  
9  
10 providers to use frequent attendance as an early marker for necessary rehabilitation. It has been shown that short  
11  
12 term sick-leaves are associated with long sickness absences and long sick-leaves in turn predict disability.[25–27] If  
13  
14 frequent attendance is predictive of future absences this could be used to trigger early supportive measures possibly  
15  
16 even before the next occurrence of sickness absence. We need to define whether both occasional and persistent FAs  
17  
18 are at equal risk of sickness absences to define appropriate groups for OH interventions where the aim is to prevent  
19  
20 sickness absences and disability. Workplace interventions and OH intervention programs on individuals at risk of  
21  
22 sickness absences indicate both cost effectiveness and reduction in sickness absence days.[28–30] However, current  
23  
24 interventions are often designed around sickness absences and do not take into account patterns of frequent use.  
25  
26 Interventions should be aimed at the group of FAs who are also at risk of long term sickness absences to ensure both  
27  
28 resource management and disability prevention.  
29  
30

31 We aim to determine how sickness absences of different lengths are associated with occasional and persistent  
32  
33 frequent attendance.  
34  
35  
36  
37  
38  
39  
40  
41  
42  
43  
44  
45  
46  
47  
48  
49  
50  
51  
52  
53  
54  
55  
56  
57  
58  
59  
60

## MATERIAL AND METHODS

### Study setting and design

In Finland, OH is an important primary care provider for the working population that functions in parallel with municipal and private primary care services. Occupational health services (OHS) are divided into obligatory preventive services and voluntary primary care services of which the latter is, however, well used and covers up to 90% of employees [16]. OHS primary care is paid by the employers for the most part and is free of charge for the employees. In the Finnish OH primary care, in addition to work-related issues and issues related to work ability, acute and chronic illnesses and typical primary care issues are treated. In primary care issues a patient can choose where to attend but three out four patients having visited OHS named their OHS unit as their main primary care provider [31]. OHS primary care is often used as the sole primary care provider for the working population.[15] The role of the OHS units in primary care has increased in the past years [32] and primary care is used to support the preventive functions of the OHS by identifying individuals at risk of lowered work ability from the primary care appointments. Most professionals in OHS are specialized in occupational health. Physiotherapists and psychologists can be consulted after a referral from a nurse or a physician.

This study is conducted using data from Pihlajalinna Työterveys – a large nationwide private OHS provider. The clientele of Pihlajalinna includes employees from both municipal and private employers, with representation from different company sizes and industries. The study is a longitudinal register study using electronic medical record data of Pihlajalinna covering years 2014–2016.

### Data collection

Data used for the study included all visits to healthcare professionals and diagnostic codes (International Classification of Diseases, 10<sup>th</sup> edition, ICD-10) registered for the visit through the study years 2014–2016. The data also included sickness absences, employee sex and age and employers' industry and size. Pihlajalinna collected the data and the data was sent in pseudonymized format to the University of Tampere for analysis. There were no missing data.

The data initially comprised 78 507 patients. No sampling was done during data collection. The study population was limited to employees who had visited the OH unit during the study years and were aged 18–68 years. Only face-to-face contacts were included and occupational safety check-ups and other mandatory check-ups not initiated by the patient were excluded based on invoice codes. Patients who had no employer provided primary care service plan

1  
2  
3 were also excluded from the study. After these exclusions the study population comprised 59 676 patients. Diagnostic  
4 codes, using ICD-10, are mandatory for visits to a physician. We used the first (i.e. the main) ICD-10 diagnosis  
5 registered for each visit in this study. Most employers had all employees' sickness absence certificates are entered  
6 into the medical records through a portal, even though they were certified outside the OHS.  
7  
8  
9  
10

## 11 **Statistical analysis**

12 We defined FA as the top decile of attenders.[2,14] We used visits to physicians, nurses, physiotherapists and  
13 psychologists to define frequent attenders and with our definition FA visited OH units 8 or more times yearly.[22] The  
14 general characteristics of FAs in OHS is described previously and we also made a secondary analysis of frequent  
15 attenders using only visits to the physician, which did not alter the results.[22] Patients being in the top decile in 2014  
16 but not in any other study year were categorized as 1-year-FA (1yFA) representing occasional FA. Patients who were in  
17 the top decile during all three study years (2014–2016) were categorized as persistent-FA (pFA). Patients who were  
18 not in the top decile in any of the study years but who had at least once contact with the OHS during the study years  
19 were used as a reference group (non-frequent attenders, non-FA). To avoid confounding, patients who were FA in  
20 2015 or 2016 but not during all three study years were excluded as they might have entered the practice during the  
21 study period, and without knowledge of their previous service use, they might have been wrongly categorized.  
22  
23  
24  
25  
26  
27  
28  
29  
30  
31  
32  
33  
34

35 We divided the study population by sex and into four age categories (18–34, 35–44, 45–54, 55–68) for  
36 characterization. Employer industries were categorized according to Statistics Finland /Statistical Classification of  
37 economic activities in the European Community (TOL2008/Nace Rev.2). We analyzed sickness absences with different  
38 categorizations. First we divided sickness absence episodes into groups according to the length: no absence, short  
39 (1–3 d), intermediate (4–14 d) and long (15 d or more) absence.[33] In addition, we looked at the total number of  
40 sickness absence days per year with two different categorizations (0, 1–15 or more than 15 days per year and short  
41 (1–3 d) intermediate (4–14 d) and long (15 d or more)). [34] Additional analysis using sickness absences as a  
42 continuous variable were conducted. When examining sickness absences yearly we included self-certified and nurse-  
43 certified sick-leaves. In the analysis of diagnostic codes associated with sickness absenteeism, only physician certified  
44 sick-leaves were used.  
45  
46  
47  
48  
49  
50  
51  
52  
53  
54  
55

56 Chi square and Kruskal-Wallis –tests were used to test for significant differences between groups. Multinomial logistic  
57 regression was used to analyze associations of the dependent variable FA-status (1yFA, pFA and non-FA) with the  
58  
59  
60

1  
2  
3 independent variable (occurrence of a sick-leave episode and number of sickness absence days yearly). The results  
4  
5 were adjusted for sex, age, industry, number of ICD-10 diagnoses and existence of cancer diagnosis (C00-C97). Odds  
6  
7 ratios (OR) with 95% confidence intervals (CI) were determined. Statistical analyses were conducted in University of  
8  
9 Tampere using IBM SPSS Statistics version 23. In all analyses P values less than 0.05 were considered statistically  
10  
11 significant.  
12  
13

### 14 **Ethical considerations**

15  
16 The National Institute of Health and Welfare (THL/556/5.05.OO/2016) and the ethics committee of Pirkanmaa  
17  
18 Hospital District (ETL R16041) approved the study. According to Finnish legislation (Personal Data Act, Finland,  
19  
20 22.4.1999) individual consent was not needed as this is a large-scale register-based study where no single participant  
21  
22 can be recognized.  
23  
24  
25  
26

### 27 **PATIENT AND PUBLIC INVOLVEMENT**

28  
29 As it is a study of medical records, patients were not involved.  
30  
31  
32  
33  
34  
35  
36  
37  
38  
39  
40  
41  
42  
43  
44  
45  
46  
47  
48  
49  
50  
51  
52  
53  
54  
55  
56  
57  
58  
59  
60

## RESULTS

Our study population constituted 59 676 individuals during the study years (2014–2016). The population included 592 pFA and 2468 1yFA in 2014. The latter group diminished due to loss for follow-up as time went on so that in 2015 there were 1986 individuals and in 2016 1391 individuals in 1yFA group. Figure 1 shows the flow of the study population. Table 1 below shows descriptive statistics of 1yFA, pFA and non-FA during the study years. There were more women than men in both 1yFA and pFA throughout the study years. Over 90% of the pFA group received a sick-leave certificate from a physician every year and 90% of the 1yFA group received one in the first year. Thereafter of the 1yFA group, 70% or more received a sick-leave certificate from a physician during the study. In 2016 almost 70% of pFA and 30% of 1yFA had a sick-leave longer than 15 days while only 9% of non-FA had such a long absence.

*[Insert Figure 1. Flow of the study population]*

Table 1. Characteristics of by status (1yFA, pFA and non-FA) yearly (2014–2016), n = 59 676

|                                         | 2014, n = 24772  |                |                     | 2015, n = 27116  |                |                     | 2016, n = 41241  |                |                     |
|-----------------------------------------|------------------|----------------|---------------------|------------------|----------------|---------------------|------------------|----------------|---------------------|
|                                         | 1yFA<br>n = 2468 | pFA<br>n = 592 | non-FA<br>n = 21712 | 1yFA<br>n = 1986 | pFA<br>n = 592 | non-FA<br>n = 24538 | 1yFA<br>n = 1391 | pFA<br>n = 592 | non-FA<br>n = 39258 |
|                                         | n (%)            | n (%)          | n (%)               | n (%)            | n (%)          | n (%)               | n (%)            | n (%)          | n (%)               |
| <b>Sex</b>                              |                  |                |                     |                  |                |                     |                  |                |                     |
| Male                                    | 1 134 (46)       | 262 (44)       | 12 783 (59)         | 924 (46)         | 262 (44)       | 14 628 (60)         | 679 (49)         | 262 (44)       | 22 277 (57)         |
| Female                                  | 1 334 (54)       | 330 (56)       | 8 929 (41)          | 1 062 (54)       | 330 (56)       | 9 910 (40)          | 712 (51)         | 330 (56)       | 16 981 (43)         |
| <b>Age</b>                              |                  |                |                     |                  |                |                     |                  |                |                     |
| 18–34                                   | 704 (29)         | 130 (22)       | 6 751 (31)          | 501 (25)         | 121 (20)       | 7 434 (30)          | 264 (19)         | 108 (18)       | 12 106 (31)         |
| 35–44                                   | 552 (22)         | 145 (25)       | 5 135 (24)          | 465 (24)         | 137 (23)       | 5 841 (24)          | 319 (23)         | 132 (22)       | 9 467 (24)          |
| 45–54                                   | 638 (26)         | 186 (31)       | 5 673 (26)          | 521 (26)         | 190 (32)       | 6 532 (27)          | 413 (30)         | 188 (32)       | 10 139 (26)         |
| 55–68                                   | 574 (23)         | 131 (22)       | 4 153 (19)          | 499 (25)         | 144 (25)       | 4 731 (19)          | 395 (28)         | 164 (28)       | 7 546 (19)          |
| <b>Absences</b>                         |                  |                |                     |                  |                |                     |                  |                |                     |
| Sickness absence certified by physician | 2 219 (90)       | 551 (93)       | 10 309 (47)         | 1 511 (76)       | 556 (94)       | 11 642 (47)         | 978 (70)         | 547 (92)       | 18 350 (47)         |
| 0 days /year                            | 207 (8)          | 33 (6)         | 9 554 (44)          | 377 (19)         | 26 (4)         | 10 374 (42)         | 315 (23)         | 34 (6)         | 16 873 (43)         |
| 1–15 days /year                         | 768 (31)         | 147 (25)       | 10 026 (46)         | 873 (44)         | 127 (22)       | 11 722 (48)         | 653 (47)         | 150 (25)       | 18 906 (48)         |
| >15 days /year                          | 1493 (61)        | 412 (69)       | 2 132 (10)          | 739 (37)         | 439 (74)       | 2 442 (10)          | 423 (30)         | 408 (69)       | 3 479 (9)           |

Statistically significant results with Chi square -tests,  $p < 0.001$

FA status was defined as the top decile of attenders (frequent attender 10%, FA10)

1yFA = Patients that were in the top decile of attenders in 2014

pFA = Patients that were in the top decile in all three study years (2014, 2015 and 2016)

non-FA = Patients that were never in the top decile were considered as a reference group, non-frequent attenders

1  
2  
3 As a whole the pFA group had a median of 16 absence episodes during the three study years, the 1yFA group had 7  
4 episodes and the non-FA group had a median of 2 episodes, all certified by a physician (table 2). The pFA group had a  
5 constant median 5 to 6 sickness absence episodes yearly whereas the 1yFA group had a median of 4 sickness absence  
6 episodes in 2014, after which the frequency of episodes diminished. However, the frequency of sickness episodes  
7 remained higher among the 1yFA group than in the non-FA group two years after the 1yFA group's frequent  
8 attendance ended.  
9  
10  
11  
12  
13  
14  
15

16 The lengths of sickness absence episodes are shown in table 2. The average length of a sickness absence episode is  
17 consistently high for the pFA group. It is equally high for 1yFA in the first study year, their year of frequent attendance,  
18 but the mean and median length of sickness absence reduces slowly, while remaining higher through the study years  
19 compared with the non-FA group. The median lengths of single absence episodes are equal between the groups. The  
20 median length of single sickness absence episode due to mental and behavioural disorders (F00–F99) was 9, 7 and 7  
21 days for 1yFA, pFA and non-FA respectively. The median lengths for musculoskeletal disorders (M00–M99) among  
22 1yFA, pFA and non-FA were 7, 5 and 5 days respectively (data not shown).  
23  
24  
25  
26  
27  
28  
29  
30  
31  
32  
33  
34  
35  
36  
37  
38  
39  
40  
41  
42  
43  
44  
45  
46  
47  
48  
49  
50  
51  
52  
53  
54  
55  
56  
57  
58  
59  
60



Table 2. Median and average lengths of sickness absence episodes, median and average number of absence days yearly and median and average number of written sickness absence certificates yearly (2014–2016) by frequent attender status, n = 33 592 (patients with a sickness absence certified by a physician)

|                                    | Total length of sickness absences per year |    | Average length of a single sickness absence episode |    | Number of written sickness absence certificates |    |
|------------------------------------|--------------------------------------------|----|-----------------------------------------------------|----|-------------------------------------------------|----|
|                                    | av.                                        | md | av.                                                 | md | av.                                             | md |
| <b>2014</b><br>(n = 23 232)        | ***                                        |    | ***                                                 |    | ***                                             |    |
| 1yFA                               | 46.1                                       | 23 | 9.2                                                 | 4  | 5.0                                             | 4  |
| pFA                                | 42.6                                       | 25 | 7.1                                                 | 4  | 6.0                                             | 5  |
| non-FA                             | 14.4                                       | 6  | 7.7                                                 | 3  | 1.9                                             | 1  |
| <b>2015</b><br>(n = 25 151)        | ***                                        |    | ***                                                 |    | ***                                             |    |
| 1yFA                               | 41.2                                       | 14 | 11.7                                                | 4  | 3.5                                             | 3  |
| pFA                                | 51.4                                       | 29 | 8.0                                                 | 4  | 6.4                                             | 6  |
| non-FA                             | 14.0                                       | 5  | 7.5                                                 | 3  | 1.9                                             | 1  |
| <b>2016</b><br>(n = 38 054)        | ***                                        |    | ***                                                 |    | ***                                             |    |
| 1yFA                               | 28.0                                       | 10 | 9.1                                                 | 4  | 3.1                                             | 2  |
| pFA                                | 51.6                                       | 24 | 8.8                                                 | 4  | 5.9                                             | 5  |
| non-FA                             | 12.5                                       | 5  | 6.9                                                 | 3  | 1.8                                             | 1  |
| <b>2014 – 2016</b><br>(n = 56 042) | ***                                        |    | ***                                                 |    | ***                                             |    |
| 1yFA                               | 82.5                                       | 41 | 9.8                                                 | 4  | 8.4                                             | 7  |
| pFA                                | 138.4                                      | 96 | 7.9                                                 | 4  | 17.4                                            | 16 |
| non-FA                             | 17.7                                       | 7  | 7.3                                                 | 3  | 2.4                                             | 2  |

Kruskal-Wallis Test, \*\*\* =  $p < 0.001$

av. = average, md = median

FA status was defined as the top decile of attenders (frequent attender 10%, FA10)

1yFA = Patients that were in the top decile of attenders in 2014

pFA = Patients that were in the top decile in all three study years (2014, 2015 and 2016)

non-FA = Patients that were never in the top decile were considered as a reference group, non-frequent attenders.

1  
2  
3  
4  
5  
6  
7  
8  
9  
10  
11  
12  
13  
14  
15  
16  
17  
18  
19  
20  
21  
22  
23  
24  
25  
26  
27  
28  
29  
30  
31  
32  
33  
34  
35  
36  
37  
38  
39  
40  
41  
42  
43  
44  
45  
46  
47  
48  
49  
50  
51  
52  
53  
54  
55  
56  
57  
58  
59  
60

Throughout the study years long sickness absences (15 or more days yearly) were mostly due to musculoskeletal disorders (table 3). Injuries were the second largest diagnostic group for non-FA causing long absences while for 1yFA and pFA long absences were caused by mental and behavioural disorders. Musculoskeletal and mental disorders caused 64% of long sick-leave episodes for 1yFA and 63% for pFA, while for the non-FA group the proportion was 46%.

For peer review only

Table 3. Diagnostic codes associated with sickness absences of different lengths (for sickness absence certificates given by a physician), 2014 – 2016, n = number of sickness absence certificates

|                                                                             | 1yFA, n = 19 506      |                        |                                 | pFA, n = 10 117       |                        |                                 | non-FA, n = 74 176      |                          |                                 |
|-----------------------------------------------------------------------------|-----------------------|------------------------|---------------------------------|-----------------------|------------------------|---------------------------------|-------------------------|--------------------------|---------------------------------|
|                                                                             | 1-3 days,<br>n = 8597 | 4-14 days,<br>n = 8261 | 15 or more<br>days,<br>n = 2648 | 1-3 days,<br>n = 4732 | 4-14 days,<br>n = 4357 | 15 or more<br>days,<br>n = 1028 | 1-3 days,<br>n = 39 566 | 4-14 days,<br>n = 28 243 | 15 or more<br>days,<br>n = 6367 |
| <b>ICD-10</b>                                                               | n (%)                 | n (%)                  | n (%)                           | n (%)                 | n (%)                  | n (%)                           | n (%)                   | n (%)                    | n (%)                           |
| J00-J99 Diseases of the respiratory system                                  | 4020 (47)             | 1367 (17)              | 48 (2)                          | 2150 (45)             | 810 (17)               | 19 (2)                          | 20 856 (53)             | 6570 (23)                | 118 (2)                         |
| M00-M99 Diseases of the musculoskeletal system and connective tissue        | 1545 (18)             | 3678 (45)              | 1248 (47)                       | 1028 (22)             | 2042 (47)              | 483 (47)                        | 5585 (14)               | 9820 (35)                | 1982 (31)                       |
| S00-T98 Injury, poisoning and certain other consequences of external causes | 463 (5)               | 1045 (13)              | 366 (14)                        | 221 (5)               | 461 (11)               | 136 (13)                        | 2100 (5)                | 4640 (16)                | 1471 (23)                       |
| F00-F99 Mental and behavioural disorders                                    | 281 (3)               | 809 (10)               | 439 (17)                        | 165 (4)               | 353 (8)                | 164 (16)                        | 829 (2)                 | 2171 (8)                 | 948 (15)                        |
| A00-B99 Certain infectious and parasitic diseases                           | 603 (7)               | 145 (2)                | 4 (0)                           | 255 (5)               | 52 (1)                 | 4 (0)                           | 2749 (7)                | 792 (3)                  | 35 (1)                          |
| Others                                                                      | 1685 (20)             | 1217 (15)              | 543 (21)                        | 913 (19)              | 639 (15)               | 222 (22)                        | 7447 (19)               | 42 500 (15)              | 1813 (28)                       |

ICD-10 = International Classification of Diseases, 10<sup>th</sup> edition

FA status was defined as the top decile of attenders (frequent attender 10%, FA10)

1yFA = Patients that were in the top decile of attenders in 2014

pFA = Patients that were in the top decile in all three study years (2014, 2015 and 2016)

non-FA = Patients that were never in the top decile were considered as a reference group, non-frequent attenders

In the table are presented the five largest diagnostic groups that had the most sickness absence certificates written through the study years, arranged according to the number of certificates in each category

1  
2  
3 In the fully adjusted multinomial logistic regression model there was no significant difference between short absences  
4 between the groups (table 4). In the first year, pFA and 1yFA did not differ significantly in their risk of any length  
5 sickness absence. However, in the following years pFA had higher odds (OR 3.73, 95% CI 2.49–5.60 in 2016) of a long  
6 sickness absence than 1yFA. These groups did not differ in their risk for intermediate length absences. Throughout the  
7 study years both 1yFA (OR 1.44, 95% CI 1.23–1.69 in 2016) and pFA (OR 2.08, 95% CI 1.39–3.10 in 2016) had higher  
8 risk for intermediate length absences than non-FA. This association was enhanced when studying long absences. In  
9 2016 1yFA had higher odds (OR 2.95, 95% CI 2.50–3.49) for having a 15 or more days' absence than non-FA, as did pFA  
10 (OR 11.0, 95% CI 7.54–16.06).

11  
12 One day of sickness absence in any of the study years increases the likelihood of being occasional or persistent FA only  
13 slightly and the results are insignificant when comparing 1yFA with pFA (table 5). As the number of sickness absence  
14 days increases, the association with FA status grows stronger. In table 6 can be seen characteristics associated with  
15 frequent attender status in sickness absences over 15 days. Female sex and morbidity (measured by number of  
16 different diagnoses given by a physician) were associated with frequent attender status in sickness absences over 15  
17 days.

Table 4. Lengths of sickness absences associated with frequent attender status in multinomial logistic regression (adjusted for sex, age, field of industry, cancer dg (C00-C97) and number of different ICD10-diagnoses given by physicians), n = 24 772 – 41 241

|                                 | 1yFA vs. non-FA |               | pFA vs. non-FA |               | pFA vs. 1yFA |             |
|---------------------------------|-----------------|---------------|----------------|---------------|--------------|-------------|
|                                 | OR              | 95 % CI       | OR             | 95 % CI       | OR           | 95 % CI     |
| <b>Sickness absences (2014)</b> |                 |               |                |               |              |             |
| no sickness absence (0 days)    | 1.0             |               | 1.0            |               | 1.0          |             |
| short (1-3 days)                | 1.15            | 0.91 - 1.45   | 1.06           | 0.61 - 1.85   | 0.93         | 0.52 - 1.67 |
| intermediate length (4-14 days) | 2.34            | 1.96 - 2.80   | 2.33           | 1.55 - 3.51   | 1.00         | 0.65 - 1.53 |
| long (15 or more days)          | 13.10           | 11.07 - 15.50 | 18.27          | 12.54 - 26.60 | 1.39         | 0.94 - 2.07 |
| <b>Sickness absences (2015)</b> |                 |               |                |               |              |             |
| no sickness absence (0 days)    | 1.0             |               | 1.0            |               | 1.0          |             |
| short (1-3 days)                | 1.20            | 1.01 - 1.42   | 1.32           | 0.72 - 2.40   | 1.09         | 0.59 - 2.04 |
| intermediate length (4-14 days) | 1.89            | 1.64 - 2.17   | 2.92           | 1.87 - 4.57   | 1.55         | 0.97 - 2.46 |
| long (15 or more days)          | 4.48            | 3.88 - 5.16   | 17.96          | 11.83 - 27.25 | 4.01         | 2.60 - 6.18 |
| <b>Sickness absences (2016)</b> |                 |               |                |               |              |             |
| no sickness absence (0 days)    | 1.0             |               | 1.0            |               | 1.0          |             |
| short (1-3 days)                | 1.08            | 0.89 - 1.29   | 0.93           | 0.54 - 1.59   | 0.86         | 0.49 - 1.52 |
| intermediate length (4-14 days) | 1.44            | 1.23 - 1.69   | 2.08           | 1.39 - 3.10   | 1.44         | 0.94 - 2.20 |
| long (15 or more days)          | 2.95            | 2.50 - 3.49   | 11.00          | 7.54 - 16.06  | 3.73         | 2.49 - 5.60 |

OR = Odds ratio, CI = Confidence interval, 1.0 = reference group

ICD-10 = International Classification of Diseases, 10<sup>th</sup> edition

FA status was defined as the top decile of attenders (frequent attender 10%, FA10)

1yFA = Patients that were in the top decile of attenders in 2014

pFA = Patients that were in the top decile in all three study years (2014, 2015 and 2016)

non-FA = Patients that were never in the top decile were considered as a reference group, non-frequent attenders.

1  
2  
3  
4  
5  
6  
7  
8  
9  
10  
11  
12  
13  
14  
15  
16  
17  
18  
19  
20  
21  
22  
23  
24  
25  
26  
27  
28  
29  
30  
31  
32  
33  
34  
35  
36  
37  
38  
39  
40  
41  
42  
43  
44  
45  
46  
47  
48  
49  
50  
51  
52  
53  
54  
55  
56  
57  
58  
59  
60

Table 5. Sickness absence associated with frequent attender status in multinomial logistic regression (adjusted for sex, age, field of industry, cancer dg (C00-C97) and number of different ICD10-diagnoses given by physicians), n = 24 772–41241

|                                       | 1yFA vs. non-FA |             | pFA vs. non-FA |             | pFA vs. 1yFA |             |
|---------------------------------------|-----------------|-------------|----------------|-------------|--------------|-------------|
|                                       | OR              | 95 % CI     | OR             | 95 % CI     | OR           | 95 % CI     |
| <b>Sickness absences (2014)</b>       |                 |             |                |             |              |             |
| A single sickness absence day in 2014 | 1.02            | 1.02 - 1.02 | 1.02           | 1.02 - 1.02 | 1.00         | 0.99 - 1.00 |
| <b>Sickness absences (2015)</b>       |                 |             |                |             |              |             |
| A single sickness absence day in 2015 | 1.01            | 1.01 - 1.01 | 1.01           | 1.01 - 1.02 | 1.00         | 1.00 - 1.00 |
| <b>Sickness absences (2016)</b>       |                 |             |                |             |              |             |
| A single sickness absence day in 2016 | 1.01            | 1.01 - 1.01 | 1.02           | 1.02 - 1.02 | 1.01         | 1.01 - 1.01 |

OR = Odds ratio, CI = Confidence interval

ICD-10 = International Classification of Diseases, 10<sup>th</sup> edition

FA status was defined as the top decile of attenders (frequent attender 10%, FA10)

1yFA = Patients that were in the top decile of attenders in 2014

pFA = Patients that were in the top decile in all three study years (2014, 2015 and 2016)

non-FA = Patients that were never in the top decile were considered as a reference group, non-frequent attenders.

Table 6. Sickness absences >15 days associated with frequent attender status in multinomial logistic regression model (adjusted for age, field of industry and cancer dg (C00-C97) and number of different ICD10- diagnoses given by physicians), n = 24 772–41 241

|                                                         | 1yFA vs. non-FA |             | pFA vs. non-FA |             | pFA vs. 1yFA |             |
|---------------------------------------------------------|-----------------|-------------|----------------|-------------|--------------|-------------|
|                                                         | OR              | 95 % CI     | OR             | 95 % CI     | OR           | 95 % CI     |
| <b>Sickness absences (2014)</b>                         |                 |             |                |             |              |             |
| Sex                                                     |                 |             |                |             |              |             |
| Male                                                    | 1.0             |             | 1.0            |             | 1.0          |             |
| Female                                                  | 1.52            | 1.28 - 1.82 | 1.76           | 1.33 - 2.31 | 1.15         | 0.88 - 1.50 |
| Number of different ICD10-diagnoses given by physicians | 2.22            | 2.08 - 2.36 | 2.84           | 2.60 - 3.10 | 1.28         | 1.19 - 1.38 |
| <b>Sickness absences (2015)</b>                         |                 |             |                |             |              |             |
| Sex                                                     |                 |             |                |             |              |             |
| Male                                                    | 1.0             |             | 1.0            |             | 1.0          |             |
| Female                                                  | 1.48            | 1.21 - 1.81 | 1.47           | 1.12 - 1.93 | 0.99         | 0.74 - 1.33 |
| Number of different ICD10-diagnoses given by physicians | 1.71            | 1.58 - 1.84 | 2.93           | 2.67 - 3.22 | 1.71         | 1.57 - 1.88 |
| <b>Sickness absences (2016)</b>                         |                 |             |                |             |              |             |
| Sex                                                     |                 |             |                |             |              |             |
| Male                                                    | 1.0             |             | 1.0            |             | 1.0          |             |
| Female                                                  | 1.18            | 0.91 - 1.53 | 1.59           | 1.19 - 2.12 | 1.34         | 0.95 - 1.91 |
| Number of different ICD10-diagnoses given by physicians | 1.76            | 1.63 - 1.91 | 2.82           | 2.58 - 3.09 | 1.60         | 1.45 - 1.77 |

OR = Odds ratio, CI = Confidence interval, 1.0 = reference group

ICD-10 = International Classification of Diseases, 10<sup>th</sup> edition

FA status was defined as the top decile of attenders (frequent attender 10%, FA10)

1yFA = Patients that were in the top decile of attenders in 2014

pFA = Patients that were in the top decile in all three study years (2014, 2015 and 2016)

non-FA = Patients that were never in the top decile were considered as a reference group, non-frequent attenders.

## DISCUSSION

Our results indicate that persistent frequent attenders have more and longer sickness absence episodes than other users of OH primary care. However, occasional frequent attenders also have more and longer sickness absences than non-frequent attenders, not only in their year of frequent attendance, but also in the following two years. Both frequent attender groups are also associated with increased risk of long sickness absences. These findings are novel and allow for better understanding of the risk for work disability associated with frequent attendance.

In a Finnish study on municipal employees sickness absence longer than 15 days was highly predictive of future disability pension and a Danish study showed that the longer the absence the higher the risk for disability pension in private sector employees. [27,34] In our study approximately 70% of persistent frequent attenders had a sickness absence >15 days yearly while for non-frequent attenders the proportion was a maximum of 10% through the study years. In 2014 almost two thirds of occasional frequent attenders had >15 days sickness absence and after two years follow up one third of occasional FA had >15 days of absence. Our results indicate that both persistent and occasional FA have more and longer sickness absences than an average user and thus might be at an increased risk of retirement due to disability.

Most long sickness absences were caused by diseases of the musculoskeletal system in all groups, but the proportions were higher for occasional and persistent FA than non-FA. The second largest group causing long absences was mental disorders for both occasional and persistent FA. Previous research indicates that musculoskeletal and mental disorders in particular cause recurrent sickness absences and that consultations for a specific illness tend to predict future consultations for the same illness group. [35,36] Detection of these individuals for follow up and necessary rehabilitative measures is important to maintain work ability. Additionally, in particular sick-leaves based on psychiatric and musculoskeletal reasons show increased risk in future for illness based retirement.[37,38] As our study shows that these diagnostic groups are associated with sickness absences of both occasional and persistent frequent attenders, both groups should be of special interest in OHS and GP setting treating working age patients.

Sickness absences predict future disability and retirement due to ill-health and these individuals should be identified for rehabilitation. This study indicates that both persistent and occasional frequent attenders are at risk of long sickness absences that in turn are associated with risk of disability pension. Vast use of services could be used as an early indicator for interventions to protect work ability. Also, as frequent attendance is mostly a self-limiting-condition



1  
2  
3 it has been argued whether occasional frequent attenders should be a target group for interventions at all.[39]

4  
5 However, our results indicate that occasional frequent attenders' sickness absences are higher than average users'  
6  
7 even after the consultation rates have reduced indicating that they are also in need of rehabilitative evaluation  
8  
9 bearing in mind work ability. In addition to occasional frequent attenders' risk of future absences, also persistent  
10  
11 frequent attenders need attention. Persistent frequent attenders appear to be a group of patients whose needs have  
12  
13 not been met. Both these patient groups should be identified and careful diagnostic evaluation should be conducted  
14  
15 to enable meeting their needs and reducing absences.  
16

17  
18 So far effective interventions on frequent attenders have been those based on in depth analysis of patient's reasons  
19  
20 for attendance and accordingly selected actions.[40] The measured outcomes have been mostly consultation  
21  
22 frequency or morbidity, but in the future, sickness absences and change in their frequency or length could be  
23  
24 measured as well. Early detection of individuals at risk of work disability based on readily available markers is crucial  
25  
26 for the implementation of timely interventions and rehabilitative measures to sustain patient's work ability.[38] Work  
27  
28 ability/disability and work relatedness could be also worth considering when discussing frequent attenders.  
29  
30 Determining how sickness absences are associated with frequent attendance is important due to the cost of  
31  
32 absenteeism on employers and society but also because of the effects on the individual – medically certified sickness  
33  
34 absences are also associated with mortality.[41,42]  
35

### 36 37 **Strengths and limitations**

38  
39  
40 The strengths of this study are the large study population from an OHS provider including wide range of industries and  
41  
42 company sizes from both rural and urban areas. The employees are representative of the working population in  
43  
44 Finland including all ages, employment lengths and status, which allows generalization outside this particular service  
45  
46 provider. The results can be generalized to OHS sector in Finland where variety of industries are present, and cautious  
47  
48 interpretations can be made concerning the working population in general. As no sampling was done, there should  
49  
50 not be selection bias in the frequent attender groups. Also, the use of medical records to define frequency of visits  
51  
52 removes inaccuracy related to self-reported utilization.[43] The novel longitudinal study design employed in this study  
53  
54 allows for examining sickness absences also after frequent attendance, which gives unique information on risks  
55  
56 associated with frequent attendance. To support this aim we chose to use FAs in 2014 only to represent occasional FA  
57  
58 allowing to examine sickness absences after consultation rates have diminished and to allow equal follow-up time  
59  
60

1  
2  
3 with the persistent FAs. Although there might be limitations to primary care services in OH, visits to nurses and  
4 physicians are not restricted. In Finland the use of GPs in primary care by the working population appears to be scarce  
5 compared to use of OHS primary care. [15,31,32] Thus, we assume that these results received from the OHS primary  
6 care in Finland can be to some extent generalized to the working population using GP services in other countries.  
7  
8

9  
10  
11 However, this study is limited by lack of information on occupational status and education since they are not available  
12 from medical records. In addition, loss to follow up in OHS may be larger than in the GP setting since patients can be  
13 lost due to an employment relationship that ends. We did not have access to medical record data of other service  
14 providers, thus the sample might include individuals that use other service sectors widely and this could not be  
15 accounted for. However, there is evidence that when OH primary care is available, it is often used as the sole primary  
16 care provider.[15] Also, we cannot track the service use of the patients lost for follow-up. This might add inaccuracy to  
17 categorization of different frequent attender groups. However, we conducted confirmatory analyses on the subgroup  
18 of 1391 occasional FAs whose service use was known for the entire study time, and the results did not differ  
19 substantially. We have conducted also confirmatory analyses to ensure that we have sufficient data also on 1–3 days'  
20 length sick-leaves. All sick-leave certificates of one of the largest employers on the Pihlajalinna client lists are entered  
21 onto the Pihlajalinna sick-leave register. When comparing the proportions of different length absence episodes  
22 between this employer and all the data the results did not differ to a great degree. We defined frequent attenders  
23 according to attendance rates across the study population since we wanted to study the working population as a  
24 whole. Our study population includes only the working, which narrows the differences between different age groups.  
25 In our previous study [22] we analyzed the risk of being FA in different age groups and we found no significant  
26 association of age with FA-status in our study population when adjusted for confounding. We used visits to all  
27 healthcare professional in the OHS to categorize FA's. This should be taken into consideration when comparing  
28 internationally although we made secondary analysis including only physician visits and the results did not alter.  
29  
30  
31  
32  
33  
34  
35  
36  
37  
38  
39  
40  
41  
42  
43  
44  
45  
46  
47  
48

## 49 **CONCLUSIONS**

50 Both occasional and persistent frequent attenders have higher odds for long and intermediate length absences, which  
51 suggests an elevated risk of future retirement due to disability. Frequent attenders should be identified in the working  
52 age population and sickness absences should be taken into account when planning frequent attender rehabilitation  
53 and interventions.  
54  
55  
56  
57  
58  
59  
60

1  
2  
3 In future, a longer follow-up of sickness absences would be useful to see whether sickness absence rate eventually  
4  
5 equalizes with the non-FA group. More understanding is needed of how frequent attendance is associated with  
6  
7 disability and retirement due to ill-health.  
8  
9  
10  
11  
12  
13  
14  
15  
16  
17  
18  
19  
20  
21  
22  
23  
24  
25  
26  
27  
28  
29  
30  
31  
32  
33  
34  
35  
36  
37  
38  
39  
40  
41  
42  
43  
44  
45  
46  
47  
48  
49  
50  
51  
52  
53  
54  
55  
56  
57  
58  
59  
60

For peer review only

1  
2  
3  
4  
5  
6  
7  
8  
9  
10  
11  
12  
13  
14  
15  
16  
17  
18  
19  
20  
21  
22  
23  
24  
25  
26  
27  
28  
29  
30  
31  
32  
33  
34  
35  
36  
37  
38  
39  
40  
41  
42  
43  
44  
45  
46  
47  
48  
49  
50  
51  
52  
53  
54  
55  
56  
57  
58  
59  
60

### **FUNDING**

This study is part of the “Effectiveness and Indicators of Occupational Health Services” supported by the European Social Fund [reference number S20659].

### **COMPETING INTERESTS**

The Authors declare that there is no conflict of interest.

### **ACKNOWLEDGEMENTS**

The authors acknowledge the participation of the occupational health staff in the study and all the individual clients who are part of this study.

### **AUTHOR’S CONTRIBUTIONS**

The study was conceptualized by JU and the study design was planned by all the authors (TR, SA, NT, MS, MV and JU). Planning of data collection and analysis was done by all authors (TR, SA, NT, MS, MV and JU). NT analyzed the data. TR wrote the first draft and all authors (TR, SA, NT, MS, MV and JU) contributed to the final version by revising and commenting on the draft. All authors approved the final version.

### **AVAILABILITY OF DATA AND MATERIAL**

The data that support the findings of this study are available from Pihlajalinna Työterveys but restrictions apply to the availability of these data, which were used under license for the current study, and so are not publicly available. Data are however available from the authors upon reasonable request and with permission of Pihlajalinna Työterveys.

## REFERENCES

- 1 Gill D, Dawes M, Sharpe M, *et al.* GP frequent consulters: Their prevalence, natural history, and contribution to rising workload. *Br J Gen Pract* 1998;**48**:1856–7.
- 2 Smits FT, Brouwer HJ, ter Riet G, *et al.* Epidemiology of frequent attenders: a 3-year historic cohort study comparing attendance, morbidity and prescriptions of one-year and persistent frequent attenders. *BMC Public Health* 2009;**9**. doi:10.1186/1471-2458-9-36
- 3 Patel S, Kai J, Atha C, *et al.* Clinical characteristics of persistent frequent attenders in primary care: Case-control study. *Fam Pract* 2015;**32**:624–30. doi:10.1093/fampra/cmz076
- 4 Droomers M, Westert GP. Do lower socioeconomic groups use more health services, because they suffer from more illnesses? *Eur J Public Health* 2004;**14**:311–3.
- 5 Bergh H, Baigi A, Marklund B. Consultations for injuries by frequent attenders are found to be medically appropriate from general practitioners' perspective. *Scand J Public Health* 2005;**33**:228–32. doi:10.1080/14034940510005761
- 6 Pymont C, Butterworth P. Longitudinal cohort study describing persistent frequent attenders in Australian primary healthcare. *BMJ Open* 2015;**5**:e008975. doi:10.1136/bmjopen-2015-008975
- 7 Smits FT, Brouwer HJ, Zwinderman AH, *et al.* Why do they keep coming back? Psychosocial etiology of persistence of frequent attendance in primary care: A prospective cohort study. *J Psychosom Res* 2014;**77**:492–503. doi:10.1016/j.jpsychores.2014.08.003
- 8 Vedsted P, Christensen MB. Frequent attenders in general practice care: A literature review with special reference to methodological considerations. *Public Health* 2005;**119**:118–37. doi:10.1016/j.puhe.2004.03.007
- 9 Scaife B, Gill P, Heywood P, *et al.* Socio-economic characteristics of adult frequent attenders in general practice: secondary analysis of data. *Fam Pract* 2000;**17**:298–304. doi:10.1093/fampra/17.4.298
- 10 Al-Windi A, Elmfeldt D, Svärdsudd K. The influence of sociodemographic characteristics on health care utilisation in a Swedish municipality. *Ups J Med Sci* 2004;**109**:33–42. doi:10.3109/2000-1967-108
- 11 Karlsson H, Lehtinen V, Joukamaa M. Frequent Attenders of Finnish Public Primary Health-Care -

1  
2  
3  
4  
5  
6  
7  
8  
9  
10  
11  
12  
13  
14  
15  
16  
17  
18  
19  
20  
21  
22  
23  
24  
25  
26  
27  
28  
29  
30  
31  
32  
33  
34  
35  
36  
37  
38  
39  
40  
41  
42  
43  
44  
45  
46  
47  
48  
49  
50  
51  
52  
53  
54  
55  
56  
57  
58  
59  
60

Sociodemographic Characteristics and Physical Morbidity. *Fam Pract* 1994;**11**:424–30.

doi:10.1093/fampra/11.4.424

- 12 Bergh H, Baigi A, Månsson J, *et al.* Predictive factors for long-term sick leave and disability pension among frequent and normal attenders in primary health care over 5 years. *Public Health* 2007;**121**:25–33.

doi:10.1016/j.puhe.2006.08.018

- 13 Jyväsjärvi S, Keinänen-Kiukaanniemi S, Väisänen E, *et al.* Frequent attenders in a Finnish health centre: morbidity and reasons for encounter. *Scand J Prim Health Care* 1998;**16**:141–8.

doi:10.1080/028134398750003089

- 14 Luciano J V, Fernández A, Pinto-Meza A, *et al.* Frequent attendance in primary care: comparison and implications of different definitions. *Br J Gen Pract* 2010;**60**:e49-55. doi:10.3399/bjgp10X483139

- 15 Ikonen A, Räsänen K, Manninen P, *et al.* Use of health services by Finnish employees in regard to health-related factors: The population-based Health 2000 study. *Int Arch Occup Environ Health* 2013;**86**:451–62.

doi:10.1007/s00420-012-0778-0

- 16 Lappalainen K, Aminoff M, Hakulinen H, *et al.* *Työterveyshuolto Suomessa vuonna 2015 [Occupational healthcare in Finland 2015 Report] (In Finnish with english summary)*. Työterveyslaitos 2016.

- 17 Laaksonen M, Rantala J, Järnefelt N, *et al.* *Työkyvyttömyyden vuoksi menetetty työura. [Loss of working career due to illness based retirement] (In Finnish with english summary)*. Finnish Centre for Pensions (Eläketurvakeskus) 2016.

- 18 Henderson M, Glozier N, Elliot KH. Editorials: Long term sickness absence. *BMJ Br Med J* 2005;**330**:802–3.

doi:10.1136/bmj.330.7499.1087-a

- 19 Pekkala J, Blomgren J, Pietiläinen O, *et al.* Occupational class differences in diagnostic-specific sickness absence: a register-based study in the Finnish population. *BMC Public Health* 2017;**17**. doi:10.1186/s12889-017-4674-0

017-4674-0

- 20 Bergh H, Marklund B. Characteristics of frequent attenders in different age and sex groups in primary health care. *Scand J Prim Health Care* 2003;**21**:171–7. doi:10.1080/02813430310001149

- 1  
2  
3 21 Karlsson H, Lehtinen V, Joukamaa M. Psychiatric morbidity among frequent attender patients in primary care.  
4  
5 *Gen Hosp Psychiatry* 1995;**17**:19–25. doi:10.1016/0163-8343(94)00059-M  
6  
7  
8 22 Reho T, Atkins S, Talola N, *et al.* Frequent attenders in occupational health primary care – a cross-sectional  
9  
10 study. *Scand J Public Health* Published Online First: 2018. doi:10.1177/1403494818777436  
11  
12  
13 23 Kimanen A, Rautio M, Manninen P, *et al.* Primary care visits to occupational health physicians and nurses in  
14  
15 Finland. *Scand J Public Health* 2011;**39**:525–32. doi:10.1177/1403494811399651  
16  
17  
18 24 Ikonen A, Räsänen K, Manninen P, *et al.* Work-Related Primary Care in Occupational Health Physician's  
19  
20 Practice. *J Occup Rehabil* 2012;**22**:88–96. doi:10.1007/s10926-011-9325-1  
21  
22  
23 25 Hultin H, Lindholm C, Möller J, *et al.* Is There an Association between Long-Term Sick Leave and Disability  
24  
25 Pension and Unemployment beyond the Effect of Health Status? – A Cohort Study. *PLoS One* 2012;**7**:e35614.  
26  
27 doi:10.1371/journal.pone.0035614  
28  
29 26 Hultin H, Lindholm C, Malfert M, *et al.* Short-term sick leave and future risk of sickness absence and  
30  
31 unemployment - the impact of health status. *BMC Public Health* 2012;**12**:861. doi:10.1186/1471-2458-12-861  
32  
33  
34 27 Lund T, Kivimäki M, Labriola M, *et al.* Using administrative sickness absence data as a marker of future  
35  
36 disability pension: The prospective DREAM study of Danish private sector employees. *Occup Environ Med*  
37  
38 2008;**65**:28–31. doi:10.1136/oem.2006.031393  
39  
40  
41 28 Van Oostrom S, Driessen M, de Vet H, *et al.* Workplace interventions for preventing work disability (Review).  
42  
43 *Cochrane Database Syst Rev* 2009:1–67.  
44  
45  
46 29 Taimela S, Justen S, Aronen P, *et al.* An occupational health intervention programme for workers at high risk  
47  
48 for sickness absence. Cost effectiveness analysis based on a randomised controlled trial. *Occup Env Med*  
49  
50 2008;**65**:242–8.  
51  
52  
53 30 Kant I, Jansen NWH, van Amelsvoort LGPM, *et al.* Structured early consultation with the occupational  
54  
55 physician reduces sickness absence among office workers at high risk for long-term sickness absence: A  
56  
57 randomized controlled trial. *J Occup Rehabil* 2008;**18**:79–86. doi:10.1007/s10926-007-9114-z  
58  
59  
60 31 Virtanen P, Mattila K. Työterveyslääkärin potilas käy myös terveyskeskuksessa, tosin harvoin [Patients of

1  
2  
3  
4  
5  
6  
7  
8  
9  
10  
11  
12  
13  
14  
15  
16  
17  
18  
19  
20  
21  
22  
23  
24  
25  
26  
27  
28  
29  
30  
31  
32  
33  
34  
35  
36  
37  
38  
39  
40  
41  
42  
43  
44  
45  
46  
47  
48  
49  
50  
51  
52  
53  
54  
55  
56  
57  
58  
59  
60

occupational health physicians also visit health centre GPs, albeit seldom] (In Finnish with English summary).  
*Suom Lääkäril* 2011;**47**:3583–6.

32 Vaarama M, Moisio P, Karvonen S. Suomalaisten hyvinvointi 2010 [Finnish well-being 2010] (In Finnish).  
Helsinki: 2010.

33 Laaksonen M, He L, Pitkäniemi J. The durations of past sickness absences predict future absence episodes. *J  
Occup Environ Med* 2013;**55**:87–92. doi:10.1097/JOM.0b013e318270d724

34 Kivimäki M, Forma P, Wikström J, *et al.* Sickness absence as a risk marker of future disability pension: the 10-  
town study. *J Epidemiol Community Health* 2004;**58**:710–1. doi:10.1136/jech.2003.015842

35 Roelen C, Koopmans P, Anema J, *et al.* Recurrence of Medically Certified Sickness Absence According to  
Diagnosis: A Sickness Absence Register Study. *J occupational Rehabil* 2010;**20**:113–21. doi:10.1007/s10926-  
009-9226-8

36 Jordan K, Ong BN, Croft P. Previous consultation and self reported health status as predictors of future  
demand for primary care. *J Epidemiol Community Health* 2003;**57**:109–13.

37 Kivimäki M, Ferrie JE, Hagberg J, *et al.* Diagnosis-specific sick leave as a risk marker for disability pension in a  
Swedish population. *J Epidemiol Community Health* 2007;**61**:915–20. doi:10.1136/jech.2006.055426

38 Alexanderson K, Kivimäki M, Ferrie JE, *et al.* Diagnosis-specific sick leave as a long-term predictor of disability  
pension: A 13-year follow-up of the GAZEL cohort study. *J Epidemiol Community Health* 2012;**66**:155–9.  
doi:10.1136/jech.2010.126789

39 Smits FTM, Brouwer HJ, van Weert HCP, *et al.* Predictability of persistent frequent attendance: A historic 3-  
year cohort study. *Br J Gen Pract* 2009;**59**:114–9. doi:10.3399/bjgp09X395120

40 Haroun D, Smits F, van Etten-Jamaludin F, *et al.* The effects of interventions on quality of life, morbidity and  
consultation frequency in frequent attenders in primary care: A systematic review. *Eur J Gen Pract*  
2016;**22**:71–82. doi:10.3109/13814788.2016.1161751

41 Kivimäki M, Head J, Ferrie JE, *et al.* Sickness absence as a global measure of health: evidence from mortality in  
the Whitehall II prospective cohort study. *BMJ* 2003;**327**. doi:10.1136/bmj.327.7411.364



1  
2  
3 42 Anema JR, van der Beek AJ. Medically certified sickness absence. *BMJ* 2008;**337**:a1174.  
4  
5 doi:10.1136/BMJ.A1174  
6

7  
8 43 Bellón JÁ, Lardelli P, De J, *et al.* Validity of self reported utilisation of primary health care services in an urban  
9  
10 population in Spain. *J Epidemiol Community Heal* 2000;**54**:544–51.  
11  
12  
13  
14  
15  
16  
17  
18  
19  
20  
21  
22  
23  
24  
25  
26  
27  
28  
29  
30  
31  
32  
33  
34  
35  
36  
37  
38  
39  
40  
41  
42  
43  
44  
45  
46  
47  
48  
49  
50  
51  
52  
53  
54  
55  
56  
57  
58  
59  
60

For peer review only

1  
2  
3  
4  
5  
6  
7  
8  
9  
10  
11  
12  
13  
14  
15  
16  
17  
18  
19  
20  
21  
22  
23  
24  
25  
26  
27  
28  
29  
30  
31  
32  
33  
34  
35  
36  
37  
38  
39  
40  
41  
42  
43  
44  
45  
46  
47  
48  
49  
50  
51  
52  
53  
54  
55  
56  
57  
58  
59  
60

**FIGURES**

Figure 1. Flow of the study population

For peer review only



Figure 1. Flow of the study population  
 1yFA = Patients that were in the top decile of attenders in 2014  
 pFA = Patients that were in the top decile in all three study years (2014, 2015 and 2016)  
 non-FA = Patients that were never in the top decile were considered as a reference group, non-frequent attenders

90x90mm (300 x 300 DPI)

STROBE Statement—checklist of items that should be included in reports of observational studies

|                           | Item No. | Recommendation                                                                                                                                                                                                                                                                                                                                                                                                                                                         | Page No. |
|---------------------------|----------|------------------------------------------------------------------------------------------------------------------------------------------------------------------------------------------------------------------------------------------------------------------------------------------------------------------------------------------------------------------------------------------------------------------------------------------------------------------------|----------|
| <b>Title and abstract</b> | 1        | (a) Indicate the study’s design with a commonly used term in the title or the abstract                                                                                                                                                                                                                                                                                                                                                                                 | 2        |
|                           |          | (b) Provide in the abstract an informative and balanced summary of what was done and what was found                                                                                                                                                                                                                                                                                                                                                                    | 2        |
| <b>Introduction</b>       |          |                                                                                                                                                                                                                                                                                                                                                                                                                                                                        |          |
| Background/rationale      | 2        | Explain the scientific background and rationale for the investigation being reported                                                                                                                                                                                                                                                                                                                                                                                   | 3-4      |
| Objectives                | 3        | State specific objectives, including any prespecified hypotheses                                                                                                                                                                                                                                                                                                                                                                                                       | 4        |
| <b>Methods</b>            |          |                                                                                                                                                                                                                                                                                                                                                                                                                                                                        |          |
| Study design              | 4        | Present key elements of study design early in the paper                                                                                                                                                                                                                                                                                                                                                                                                                | 5        |
| Setting                   | 5        | Describe the setting, locations, and relevant dates, including periods of recruitment, exposure, follow-up, and data collection                                                                                                                                                                                                                                                                                                                                        | 5-6      |
| Participants              | 6        | (a) <i>Cohort study</i> —Give the eligibility criteria, and the sources and methods of selection of participants. Describe methods of follow-up<br><i>Case-control study</i> —Give the eligibility criteria, and the sources and methods of case ascertainment and control selection. Give the rationale for the choice of cases and controls<br><i>Cross-sectional study</i> —Give the eligibility criteria, and the sources and methods of selection of participants | 5-6      |
|                           |          | (b) <i>Cohort study</i> —For matched studies, give matching criteria and number of exposed and unexposed<br><i>Case-control study</i> —For matched studies, give matching criteria and the number of controls per case                                                                                                                                                                                                                                                 | 5-6      |
| Variables                 | 7        | Clearly define all outcomes, exposures, predictors, potential confounders, and effect modifiers. Give diagnostic criteria, if applicable                                                                                                                                                                                                                                                                                                                               | 6        |
| Data sources/ measurement | 8*       | For each variable of interest, give sources of data and details of methods of assessment (measurement). Describe comparability of assessment methods if there is more than one group                                                                                                                                                                                                                                                                                   | 5-6      |
| Bias                      | 9        | Describe any efforts to address potential sources of bias                                                                                                                                                                                                                                                                                                                                                                                                              | 5-6, 16  |
| Study size                | 10       | Explain how the study size was arrived at                                                                                                                                                                                                                                                                                                                                                                                                                              | 5        |

Continued on next page

|                        |     |                                                                                                                                                                                                                    |                |
|------------------------|-----|--------------------------------------------------------------------------------------------------------------------------------------------------------------------------------------------------------------------|----------------|
| Quantitative variables | 11  | Explain how quantitative variables were handled in the analyses. If applicable, describe which groupings were chosen and why                                                                                       | 5-6            |
| Statistical methods    | 12  | (a) Describe all statistical methods, including those used to control for confounding                                                                                                                              | 6              |
|                        |     | (b) Describe any methods used to examine subgroups and interactions                                                                                                                                                | 6              |
|                        |     | (c) Explain how missing data were addressed                                                                                                                                                                        | 16-17          |
|                        |     | (d) <i>Cohort study</i> —If applicable, explain how loss to follow-up was addressed                                                                                                                                | 16-17          |
|                        |     | <i>Case-control study</i> —If applicable, explain how matching of cases and controls was addressed<br><i>Cross-sectional study</i> —If applicable, describe analytical methods taking account of sampling strategy |                |
|                        |     | (e) Describe any sensitivity analyses                                                                                                                                                                              | 5, 16-17       |
| <b>Results</b>         |     |                                                                                                                                                                                                                    |                |
| Participants           | 13* | (a) Report numbers of individuals at each stage of study—eg numbers potentially eligible, examined for eligibility, confirmed eligible, included in the study, completing follow-up, and analysed                  | 5, 7, figure 1 |
|                        |     | (b) Give reasons for non-participation at each stage                                                                                                                                                               | 5, 7, figure 1 |
|                        |     | (c) Consider use of a flow diagram                                                                                                                                                                                 | 7, figure 1    |
| Descriptive data       | 14* | (a) Give characteristics of study participants (eg demographic, clinical, social) and information on exposures and potential confounders                                                                           | 7-8, 12        |
|                        |     | (b) Indicate number of participants with missing data for each variable of interest                                                                                                                                | 5              |
|                        |     | (c) <i>Cohort study</i> —Summarise follow-up time (eg, average and total amount)                                                                                                                                   | 7              |
| Outcome data           | 15* | <i>Cohort study</i> —Report numbers of outcome events or summary measures over time                                                                                                                                | 7-9            |
|                        |     | <i>Case-control study</i> —Report numbers in each exposure category, or summary measures of exposure                                                                                                               |                |
|                        |     | <i>Cross-sectional study</i> —Report numbers of outcome events or summary measures                                                                                                                                 |                |
| Main results           | 16  | (a) Give unadjusted estimates and, if applicable, confounder-adjusted estimates and their precision (eg, 95% confidence interval). Make clear which confounders were adjusted for and why they were included       | 13-14          |
|                        |     | (b) Report category boundaries when continuous variables were categorized                                                                                                                                          | 6              |
|                        |     | (c) If relevant, consider translating estimates of relative risk into absolute risk for a meaningful time period                                                                                                   | N/A            |

Continued on next page

|                          |    |                                                                                                                                                                            |       |
|--------------------------|----|----------------------------------------------------------------------------------------------------------------------------------------------------------------------------|-------|
| Other analyses           | 17 | Report other analyses done—eg analyses of subgroups and interactions, and sensitivity analyses                                                                             | 9-10  |
| <b>Discussion</b>        |    |                                                                                                                                                                            |       |
| Key results              | 18 | Summarise key results with reference to study objectives                                                                                                                   | 15    |
| Limitations              | 19 | Discuss limitations of the study, taking into account sources of potential bias or imprecision. Discuss both direction and magnitude of any potential bias                 | 16-17 |
| Interpretation           | 20 | Give a cautious overall interpretation of results considering objectives, limitations, multiplicity of analyses, results from similar studies, and other relevant evidence | 16-17 |
| Generalisability         | 21 | Discuss the generalisability (external validity) of the study results                                                                                                      | 17    |
| <b>Other information</b> |    |                                                                                                                                                                            |       |
| Funding                  | 22 | Give the source of funding and the role of the funders for the present study and, if applicable, for the original study on which the present article is based              | 17    |

\*Give information separately for cases and controls in case-control studies and, if applicable, for exposed and unexposed groups in cohort and cross-sectional studies.

**Note:** An Explanation and Elaboration article discusses each checklist item and gives methodological background and published examples of transparent reporting. The STROBE checklist is best used in conjunction with this article (freely available on the Web sites of PLoS Medicine at <http://www.plosmedicine.org/>, Annals of Internal Medicine at <http://www.annals.org/>, and Epidemiology at <http://www.epidem.com/>). Information on the STROBE Initiative is available at [www.strobe-statement.org](http://www.strobe-statement.org).
